# Supplementary material
Source: Royal Society of Chemistry journal article supplement (doi:10.1039/d6an00140h)
Supplement: d6an00140h1.xlsx [file d6an00140h1.xlsx]

## Sheet: Guidance
Metabolomics in the Wild: Research opportunities, challenges, and regulatory potential for effects-based environmental monitoring.
Georgia M. Sinclaira, Sarah L. Greena,b, Ryan Lestera,c, Katherine J. Jepped, Steven D. Melvinc, Sara M. Longe, Oliver A.H. Jonesf, David J. Bealea,†
Supplementary Material Tabs: 1. Guidance: 2. Thematic summary: Detail summary:
Supplementary Material
Tabs:
1. Guidance: Quick orientation to the supplementary workbook (what each tab is, how to navigate, and any key notes/definitions).
2. Thematic summary: High-level synthesis of the dataset (counts, percentages, thematic/category breakdowns, and charts for fast interpretation).
3. Detail summary: The full study-by-study extraction table (all variables captured from each included paper, with filled/standardized section labels).

## Sheet: Summary
📌 Summary of Studies (Table S1)
Metric	Count	% of studies		Paper Type	Count	%		Metabolomics type (derived)	Count	% of studies		📅 Publication Years				📍 Study Locations (from GPS/notes)
Total studies	119			Book	1	0.00840336		Both (targeted + untargeted)	68	0.571429		Publication Year	Count	% of studies		Location (derived)	Count	% of studies
GPS coordinates provided (Yes)	4	0.0336134		Book Chapter	3	0.0252101		Targeted only	23	0.193277		2007	2	0.0168067		Not applicable / n/a	48	0.403361
Data available (Yes)	22	0.184874		Book chapter / guidance (ERA theory & practice)	1	0.00840336		Untargeted only	0	0		2009	1	0.00840336		Other / unclear	13	0.109244
MSI Standard cited (Yes)	25	0.210084		Book chapter / guidance synthesis	1	0.00840336		Not applicable / n/a	22	0.184874		2010	1	0.00840336		Coordinates provided (country not parsed)	13	0.109244
Secondary data sources noted (nonblank)	90	0.756303		Commentary	1	0.00840336		Other / unclear	6	0.0504202		2012	2	0.0168067		Australia	10	0.0840336
				Database / resource article	2	0.0168067						2014	2	0.0168067		No location reported	9	0.0756303
				Discussion / policy / guidance	1	0.00840336						2015	5	0.0420168		Provided (see supplementary/map)	7	0.0588235
				Editorial	1	0.00840336						2016	3	0.0252101		USA	6	0.0504202
				Guidelines	1	0.00840336						2017	8	0.0672269		China	4	0.0336134
				Method / Protocol	1	0.00840336						2018	16	0.134454		Not stated	3	0.0252101
				Methods	2	0.0168067						2019	4	0.0336134		Germany	3	0.0252101
				Methods	3	0.0252101						2020	9	0.0756303		UK	2	0.0168067
				Methods / technical article	1	0.00840336						2021	8	0.0672269		France	1	0.00840336
				Poster	1	0.00840336						2022	12	0.10084
				Primary research	74	0.621849						2023	12	0.10084
				Review	15	0.12605						2024	19	0.159664
				Review	8	0.0672269						2025	14	0.117647
				Standards / Reporting guideline	1	0.00840336						2026	1	0.00840336
				Standards review	1	0.00840336
🧩 Papers per Manuscript Section
Manuscript section	Papers	% of studies	Cumulative %
Metabolomics in Ecotoxicology and Environmental Science	35	0.294118	0.294118
Data analysis and reporting	18	0.151261	0.445378
Caged Field Metabolomics	16	0.134454	0.579832
Strengths and weeknesses	16	0.134454	0.714286
Wild Caught samples	10	0.0840336	0.798319
Lab reared organisms exposed to field samples (mesocosms)	10	0.0840336	0.882353
Field Samples collected and used for experiments in a laboratory	9	0.0756303	0.957983
Wildlife‑derived cell lines	5	0.0420168	1

## Sheet: Detail (Table S1)
Table S1: Summary of included environmental metabolomics studies and extracted variables from the published scientific literature used in thie critical review paper.
Section in Manuscript	Paper Type	Title	Citation and Year	DOI Link	Overview	Species	GPS coordinantes	Sample replicates	No. of Sites	Tissue / serum analysed	Targeted or untargeted	Metabolomics Analytical approach	Contaminants measured	Water/sediment/soil analysed	Variables addressed / controlled	QC measures	Significant responses determined – were standards used	Multiple stressor scenarios -Synergistic and antagonistic effects in field settings.	Limitations expressed in the study	Data available	MSI Standard cited	Secondary data sources (data from third party)	Section (filled)	Section (standardized)
Metabolomics in Ecotoxicology and Environmental Science	Review	A metabolomics perspective on the effect of environmental micro and nanoplastics on living organisms:	Zhang et al. 2024	https://doi.org/10.1016/j.scitotenv.2024.172915	This review provides a comprehensive review of the impact of micro- and nanoplastics (MNPs) on living organisms across different environmental interfaces, including the hydrosphere, lithosphere, phytosphere, and anthroposphere. Authors state that metabolomics is a valuable tool to elucidate the metabolic impact of MNPs exposure on living organisms. In aquatic organisms metabolomics identifies the…	multiple	not in the review paper, some of the individual papers cited may have coordinates	n/a - review paper	n/a - review paper	n/a - review paper	n/a - review paper	n/a - review paper	n/a - review paper	n/a - review paper	n/a - review paper	n/a - review paper	n/a - review paper	n/a - review paper	n/a - review paper	n/a - review paper	n/a - review paper		Metabolomics in Ecotoxicology and Environmental Science	Metabolomics in Ecotoxicology and Environmental Science
	Primary research	Exposure to PFAS contaminated urban wetland water causes similar metabolic alterations to laboratory-based exposures in the freshwater amphipod Austrochiltonia subtenuis.	Sinclair et al. 2024	https://doi.org/10.1016/j.etap.2024.104494	The paper investigates the effects of exposure to per- and polyfluoroalkyl substances (PFAS) contaminated urban wetland water on the freshwater amphipod Austrochiltonia subtenuis. The water was tested and found to contain PFOS at 0.58 μg/L and trace levels of pesticides, including metolachlor, diuron, atrazine, simazine and carbaryl. Exposure to wetland water did not significantly affect amphipod…	The freshwater amphipod Austrochiltonia subtenuis.	Yes Amphipods were originally collected from a wild populationin deep creek (S 37° 37.9191.57' E 144° 47.995837'). Since that time, they have been cultured in-house at the RMIT University Bundoora campus	Yes, the control and each treatment had 10 replicates and there were 30 amphipods per sample	1 (lab based populations from a single site)	whole organisms	untargeted	GC-MS (metabolomics), LC-MS (PFAS)	Compounds found were Metolachlor, Diuron, Atrazine, Simazine and Carbaryl and PFOS, PFHxS, PFHxA, PFOA. The full list of compounds tested for is extensieve and is in the supplementary information (https://www.sciencedirect.com/science/article/pii/S1382668924001340#sec0100)	water tested	age of organisms, all experimental parameters such as water temp, duration of exposure etc	Yes, A pooled biological quality control (PBQC) was prepared by pooling 7.5 µL of each sample extract, mixing thoroughly and then aliquoting into 5 equal replicates. Laboratory blanks and PBQCs were analysed along with the samples (one every five samples) throughout the entire run to assess repeatability, instrument drift and quality control	Three metabolites were significantly changed: myo-inositol and mannose increased, while isopropyl propionate decreased. Pathway analysis indicated disruption of galactose metabolism, inositol metabolism, and phosphatidylinositol phosphate metabolism - pathways previously linked to PFAS exposure Mass spectra were recorded at 1.5 scans/s over an m/z range of 35 –550. Metabolites were putatively ann…	Yes, the water used came from a wetland that was know to contain both multiple PFAS and pesticides	Authors noted that the wetland water samples contained pesticides and PFAS, and this could have led to a synergistic mixture response, even though the measured concentrations of pesticides in the site water were below levels reported to cause responses in aquatic biota. The study also notes that environmental water bodies may vary in factors such as temperature, DOC, etc., parameters that may alt…	Data is available on request.	Yes		Metabolomics in Ecotoxicology and Environmental Science	Metabolomics in Ecotoxicology and Environmental Science
	Primary research	Derivation of metabolic point of departure using high-throughput in vitro metabolomics: investigating the importance of sampling time points on benchmark concentration values in the HepaRG cell line.	Malinowska et al. 2023	http://doi.org/10.1007/s00204-022-03439-3	In vitro toxicometabolomics study deriving points-of-departure (PODs) via benchmark concentration (BMC) modelling in HepaRG cells exposed to four chemicals across seven concentrations and five timepoints; compares POD derivation strategies (1st-ranked unannotated feature, 1st-ranked annotated feature, 25th-ranked feature) and evaluates time dependence of BMCs; demonstrates mechanistic anchoring t…	Human-derived HepaRG liver cell line (in vitro)	Not applicable	Exposure: 4 chemicals (aflatoxin B1, benzo[a]pyrene, cyclosporin A, rotenone) at 7 concentrations; 5 time points (2,6,12,24,48 h). Replicates: 3 biological x 3 technical per treated condition per timepoint (9 total); controls: 9 technical and 3 biological per timepoint (27 total).	Not applicable	Cellular extracts: polar metabolites (positive/negative nESI-DIMS) and lipids (positive nESI-DIMS); also UHPLC-MS/MS used to build HepaRG-specific metabolite/lipid library.	Untargeted high-throughput metabolomics/lipidomics (nESI-DIMS) with putative annotation via a curated library; library generation uses UHPLC–MS/MS.	High-throughput 96-well workflow with automated extraction (methanol:water for polar with tryptophan-d5 IS; lipid extraction with deuterated internal standard and chloroform); nESI-DIMS on Orbitrap Elite with NanoMate; three assays (polar+ , polar- , lipid+). Data processing in DIMSpy/Galaxy; drift correction, QC filtering (RSD<30 in QCs), batch correction; BMC modelling in BMDExpress (models exp…	Chemical stressors: aflatoxin B1, benzo[a]pyrene, cyclosporin A, rotenone (exposure concentrations in µM range).	Not applicable	Sampling timepoints; multiple POD derivation strategies; assay polarity; inclusion criteria for features; extrapolation lower limit (1/3 lowest dose) considered; mechanistic anchoring via AOP.	Intra-study QCs, extraction blanks, system suitability metabolite mix; internal standards (tryptophan-d5; dodecylphosphorylcholine-d38) for extraction; removal of outliers based on IS intensity; drift and batch correction; RSD filtering in QCs.	BMC modelling identifies concentration-response features; significance through model fit criteria and BMR thresholds; standards used for internal standards and for UHPLC-MS/MS spectral matching (mzCloud/LipidSearch) in library creation.	Not field; single-chemical exposures in vitro; discusses application to regulatory toxicology and AOP integration.	Metabolite identification confidence limited (DIMS lacks chromatography); curated library not exhaustive; PODs less mechanistically anchored when relying on unannotated features; sampling time strongly affects BMCs; need improved ID for regulatory use.	Datasets available from corresponding author upon request.	Yes: refers to MSI level 2 annotations and cites Sumner et al. reporting standards.	Uses mzCloud, LipidSearch, HMDB; MTox700+ biomarker list; National Toxicology Program extrapolation guidance; AOP literature for steatosis.	Metabolomics in Ecotoxicology and Environmental Science	Metabolomics in Ecotoxicology and Environmental Science
	Review	Human metabolism: metabolic pathways and clinical aspects.	Castro-Guarda and Evans 2025	https://doi.org/10.1016/j.mpsur.2024.10.009	Educational review/primer describing carbohydrate, lipid and amino acid metabolism, key regulatory hormones (insulin/glucagon), pathway integration (TCA, Randle cycle), and clinical contexts (diabetes, cancer, sepsis/trauma).	Human (general mammalian metabolism)	Not applicable	Not applicable (review)	Not applicable	Not applicable (review; discusses organ roles e.g., liver, pancreas, muscle, adipose)	Not applicable (not a metabolomics paper)	Not applicable; conceptual biochemical pathways and clinical biochemistry concepts.	None	Not applicable	Discusses regulation by insulin, glucagon, catecholamines, cortisol; substrate availability; redox state and energy charge as regulators.	Not applicable	Not applicable	Not applicable	Not focused on experimental limitations; broad overview.	Not applicable	Not applicable	Cites foundational literature and textbooks in further reading.	Metabolomics in Ecotoxicology and Environmental Science	Metabolomics in Ecotoxicology and Environmental Science
	Book	Applied Environmental Metabolomics Community Insights and Guidance from the Field. first ed.;	Beale et al. 2022	This is a book so no DOI but the eBook ISBN is 9780128164617 It can be seen at https://shop.elsevier.com/books/applied-environmental-metabolomics/beale/978-0-12-816460-0	Applied Environmental Metabolomics: Community Insights and Guidance from the Field brings together contributions from global experts who have helped to define and develop the exciting and rapid advances that are taking place in the field of environmental metabolomics. This book is aimed at expert users, students, researchers, and academics in metabolomics and systems biology. It not only demonstr…	Multiple, see individual chapters for details	Yes, in some cases, see individual chapters for details	Yes, in some cases, see individual chapters for details	see individual chapters for details	see individual chapters for details	see individual chapters for details	multiple, see individual chapters for details	multiple, see individual chapters for details	see individual chapters for details	yes, see individual chapters for details	yes, see individual chapters for details	yes, see individual chapters for details	see individual chapters for details	see individual chapters for details	see individual chapters for details but most chapters are based on papers where the data is available.			Metabolomics in Ecotoxicology and Environmental Science	Metabolomics in Ecotoxicology and Environmental Science
	Review	Environmental metabolomics: a critical review and future perspectives	Bundy et al. 2009	https://doi.org/10.1007/s11306-008-0152-0	This seminal review defines environmental metabolomics as the application of metabolomic profiling to understand how organisms interact with their environment, demonstrating its value for linking molecular phenotypes to ecophysiology, ecotoxicology, disease, and biotic interactions across aquatic and terrestrial systems. It critically highlights key challenges—baseline metabolic variability, limi…	n/a - review paper	n/a - review paper	n/a - review paper	n/a - review paper	n/a - review paper	n/a - review paper	n/a - review paper	n/a - review paper	n/a - review paper	n/a - review paper	n/a - review paper	n/a - review paper	n/a - review paper	n/a - review paper	n/a - review paper	n/a - review paper	n/a - review paper	Metabolomics in Ecotoxicology and Environmental Science	Metabolomics in Ecotoxicology and Environmental Science
	Review	Metabolomics: a promising tool for deciphering metabolic impairment in heavy metal toxicities	Akash et al. 2023	https://doi.org/10.3389/fmolb.2023.1218497	The paper reviews how metabolomics can be used to understand the biological effects of heavy metal exposure, showing that metals such as lead, arsenic, cadmium, and mercury disrupt lipid, amino‑acid, and energy metabolism across humans, animals, and cell models. It emphasizes oxidative stress as the central mechanism driving metabolic damage and argues that metabolomics is a powerful tool for ide…	n/a - review paper	n/a - review paper	n/a - review paper	n/a - review paper	n/a - review paper	n/a - review paper	n/a - review paper	n/a - review paper	n/a - review paper	n/a - review paper	n/a - review paper	n/a - review paper	n/a - review paper	n/a - review paper	n/a - review paper	n/a - review paper	n/a - review paper	Metabolomics in Ecotoxicology and Environmental Science	Metabolomics in Ecotoxicology and Environmental Science
	Editorial	Environmental Chemical Exposomics and Metabolomics in Toxicology: The Latest Updates	Chen 2024	https://doi.org/10.3390/toxics12090647	The paper is an editorial overview of a special issue that highlights how environmental chemical exposomics combined with metabolomics can be used to identify harmful chemical exposures and unravel their metabolic signatures and toxicity mechanisms. It summarizes recent advances showing that integrating metabolomics with exposome measurements and other omics reveals how diverse pollutants—such as…																		Metabolomics in Ecotoxicology and Environmental Science	Metabolomics in Ecotoxicology and Environmental Science
	Primary research	Widely targeted metabolomics reveals differences in metabolites of Paeonia lactiflora cultivars	Li et al. 2024	https://doi.org/10.1371/journal.pone.0298194	The roots of Paeonia lactiflora cultivars were studied via metabolomics. A total of 1237 compounds were detected, and the results revealed significant differences. Phenolic acids and flavonoids composed the largest and most diverse category of metabolites, and their contents varied greatly. Twelve proanthocyanidin metabolites likely determined the differences in colour among the three varieties.	Paeonia lactiflora	No, samples were sourced from "The National Peony and Peony Germplasm Bank" in Henan, China.	Three biological replicates were performed for each variety for independent analysis. Five tuberous roots from five mature P. lactiflora plants were collected and thoroughly mixed into each replicate.	n/a	plant roots	untargeted	ultrahigh-performance liquid chromatography-electrospray ionization-tandem mass spectrometry (UPLC-ESIMS/MS) - AB Sciex TripleTOF6600	none, just metabolites	no	study just looked at the plant metabolic profile	not detailed	Standards do not seem to have been used. Paper states that mass spectrometry data were analyzed using the MWDB self-built database (MetWare Biotechnology Co., Ltd., Wuhan, China). Public metabolite databases, such as MassBank (http://www.massbank.jp/), KNAPSAcK (http://kanaya.naist.jp/KNApSAcK/), and ChemBank (http://chembank.med.harvard.edu/compounds), were utilized for structural analysis of th…	n/a	None stated but no standards were run even though over 1000 compounds were identified.	yes	no		Metabolomics in Ecotoxicology and Environmental Science	Metabolomics in Ecotoxicology and Environmental Science
	Review	Simultaneous Quantitation and Discovery (SQUAD) Analysis: Combining the Best of Targeted and Untargeted Mass Spectrometry-Based Metabolomics	Amer et al. 2023	https://doi.org/10.3390/metabo13050648	Review proposing/defining SQUAD as a single-injection workflow combining targeted quantitation (using standards/IS) with untargeted discovery via HRAM MS data retro-mining; discusses workflow structures, nomenclature, QA/QC, opportunities and barriers.	Not applicable (methods review)	Not applicable	Not applicable (review)	Not applicable	Not applicable (review; discusses biofluids, cells, tissues generally)	Hybrid (targeted + untargeted in one injection; SQUAD)	Conceptual workflow: targeted quantitation (MRM/SRM on QQQ or PRM on HRMS; calibration curves; isotopically labelled IS where feasible) plus untargeted acquisition (full-scan MS1 with DDA/DIA; HRAM Orbitrap/TOF) enabling retro-mining; suggests Tribrid Orbitrap for alternating quantitation/discovery; stresses QA/QC with pooled QC samples, blanks, system suitability.	Not applicable (general metabolomics methodology; examples include xenobiotics/biomarkers but no single study analytes)	Not applicable	Discusses experimental design, extraction/separation choices, ionization modes, scan speed/resolution trade-offs, and quantitation levels (absolute vs relative) as key methodological controls.	Defines QA vs QC; recommends pooled QCs, system suitability standards and blanks, internal standards and/or reference materials, and monitoring drift/robustness.	Describes absolute quantitation with authentic standards + isotopically labeled IS as highest accuracy; alternatives include standards-only calibration and one-point (semi/relative) quantitation.	Discusses ability to detect physiological responses to mixtures and retro-mine for unexpected changes (e.g., low-dose cocktails), but not an empirical field synergy study.	Barriers include limited availability/cost of authentic and labelled standards; need for high-quality HRAM data and robust software for retro-mining and pathway analysis; limited applicability on low-resolution instruments.	Not applicable (review)	Discusses MSI identification levels indirectly via standards; does not cite MSI explicitly in excerpt.	Relies on published literature and databases (e.g., mzCloud, KEGG, NIST, HMDB, etc.) as described.	Metabolomics in Ecotoxicology and Environmental Science	Metabolomics in Ecotoxicology and Environmental Science
	Review	The Application of Omics Data to the Development of AOPs, in A Systems Biology Approach to Advancing Adverse Outcome Pathways for Risk Assessment	McBride et al. 2018	https://doi.org/10.1007/978-3-319-66084-4_9	Review chapter describing how genomics, transcriptomics, proteomics, and metabolomics can support development and refinement of Adverse Outcome Pathways (AOPs), including identification of molecular initiating events, key events, key event relationships, biomarkers, and quantitative AOPs; focuses on systems biology and regulatory relevance.	Not species-specific (multi-species applicability discussed)	Not applicable	Not applicable	Not applicable	Not applicable	Both (conceptual discussion of targeted and untargeted approaches)	Descriptive discussion of common metabolomics platforms (e.g. LC-MS, GC-MS, NMR); no original metabolomics analyses performed	Not applicable	Not applicable	Discusses experimental design considerations including dose–response, time-course, pathway coverage, data integration, and biological relevance	Emphasises need for standardisation, reproducibility, QA/QC, and bioinformatic validation; no original QC reported	Not applicable	Conceptual discussion only; highlights future potential for omics–AOP approaches to address complex and multiple-stressor scenarios	Challenges include data complexity, interpretation uncertainty, lack of standardisation, difficulties in multi-omics integration, and slow regulatory acceptance	No new datasets generated	Not explicitly cited	Yes – synthesises published toxicogenomics and systems biology studies	Metabolomics in Ecotoxicology and Environmental Science	Metabolomics in Ecotoxicology and Environmental Science
	Primary research	Is substrate choice an overlooked variable in ecotoxicology experiments?	Sinclair et al. 2023	https://doi.org/10.1007/s10661-023-10935-1	This study looked at the use of different materials (gauze, toilet paper, or natural leaves) as artificial substrates in ecotoxicology studies to see if the substrate used could alter an organism's metabolic profile and thus, affecting experimental outcomes and potentially leading to misleading toxicity assessments. The results show that substrate should be controlled as carefully as other factor…	Austrochiltonia subtenuis	Samples were originally collected from a wild population in Deep Creek, Bulla Rd, Bulla, Victoria, Australia (S 37° 37.919157' E 144° 47.995837') at varying life-stages and then cultured in-house at RMIT University	For the substrate experiments, five replicate beakers were used per control and each treatment; each beaker had 10 individuals. For the copper exposure there were Five replicates were used per treatment with 40 individuals in each.	1 (lab based populations from a single site)	whole organisms	untargeted	GC-MS (metabolomics)	copper	water and substrate were both tested for copper	experiments only varied the copper concentration and/or the substrate used.	Replication, A pooled biological quality control (PBQC) analysed along with the samples to assess repeatability, instrument drift and quality control.	Metabolites were putatively annotated as level 2 compounds according to the chemical reporting standards in Sumner et al. (2007) (based upon spectral similarity with public/commercial spectral libraries) where possible, using the NIST library metabolite standards as part of an in-house database for identification. The remaining compounds were either identified to level 3 or 4. Level 3 IDs were ba…	yes the study looked at both copper exposure and what type of substrate was used	not all compounds were identified, lab based study so responce in field may differ	Data available in supplementary material. Raw data/ additional data available upon request from the corresponding author.	yes		Metabolomics in Ecotoxicology and Environmental Science	Metabolomics in Ecotoxicology and Environmental Science
	Primary research	Is there any biological insight (or respite) for insects exposed to plastics? Measuring the impact on an insects central carbon metabolism when exposed to a plastic feed substrate.	Beale et al. 2022	https://doi.org/10.1016/j.scitotenv.2022.154840	Short communication; lab exposure of three insect larvae to different plastics as primary carbon source for 5 days; targeted central carbon metabolism (CCM) metabolomics to infer metabolic pathway responses and potential plastic biotransformation.	Hermetia illucens (Black soldier fly larvae); Tenebrio molitor (Mealworm larvae); Galleria mellonella (Wax moth larvae)	Not applicable (laboratory study; insects reared in CSIRO insect lab, Dutton Park QLD)	10 larvae per treatment jar; 14 jars per insect (control + 6 plastics, each with/without molasses supplement)	Not applicable (lab experiment)	Whole larvae biomass (freeze-dried) for metabolomics; frass/plastic remnants for plastic loss assessment	Targeted metabolomics (CCM panel via dynamic/tMRM)	Targeted LC–QqQ–MS (tMRM) for 171 CCM metabolites; Drosophila KEGG used for pathway mapping	Plastic substrates: PET, PE (two forms incl. expanded foam), PS, PP, PLA; with/without molasses supplement	None (organism exposure in jars)	Plastic type; supplement (molasses); exposure duration ~5 days; larval age standardized; biomass normalization	Internal standards (succinic acid 13C2; L-phenylalanine 13C); procedural blanks (n=6); pooled biological QC (n=6); log-transform and scaling; removal of features with >50% missing	Yes; significant metabolites defined by fold change ≥1.5 and p≤0.05; pathway impact/enrichment in MetaboAnalyst; internal standards used for normalization	Two-factor design (plastic type × supplement). Not a field synergy/antagonism study; interpreted combined effects of plastic and supplement on metabolic pathways.	Larval biomass variance; unreliable plastic mass-loss measurement (errors >15% for some plastics); limited assessment of micro/nanoplastics in frass; need multi-omics and microbiome work; short exposure duration.	Supplementary data via journal/DOI (noted in paper)	Yes (mentions Metabolomics Standard Initiative minimum reporting standards for replicates)	None reported	Metabolomics in Ecotoxicology and Environmental Science	Metabolomics in Ecotoxicology and Environmental Science
	Primary research	Functional analysis of pristine estuarine marine sediments	Shah et al. 2021	https://doi.org/10.1016/j.scitotenv.2021.146526	This study establishes microbial blueprints for pristine estuarine sediments using omics-based approaches. Researchers collected 50 surface sediment samples from four pristine estuaries in Western Cape York Peninsula, Australia, analysing them through 16S rRNA sequencing and metabolomics .	A total of 16,066 phylotypes (97% OTUs) across all four estuaries were obtained.	Provided in the supplementary information	not specified in detail	50	No	Targeted and untargeted	LC–QqQ-MS	range of metals and pesticides	Yes, sediment was tested	Range of metals and pesticides were tested for bue the idea was to get baseline data from 'pristine' environments	Biological blanks and pooled biological quality controls, replicate samples	Microbial blueprints of essential carbon metabolism and amino acid biosynthesis were positively correlated with community metabolic function outputs. An increase in the 125 KEGG genes related to metal homeostasis and metal resistance was observed, although none of the detected metabolites related to these specific genes were observed upon integration. There was a correlation between metal abundan…	No, idea was to get baseline data from 'pristine' environments	Study did not look at planktonic bacterial populations or look at seasonal variene in populations	Yes	Yes		Metabolomics in Ecotoxicology and Environmental Science	Metabolomics in Ecotoxicology and Environmental Science
	Primary research	Multi-omics eco-surveillance of bacterial community function in legacy contaminated estuary sediments.	Hillyer et al. 2023	https://doi.org/10.1016/j.envpol.2022.120857	This study applies multi‑omics eco‑surveillance (genomics, metabolomics, and lipidomics) to reveal how legacy metal contamination reshapes bacterial community structure, metabolic function, and adaptive responses in estuarine sediments. By linking genetically inferred functions with realised metabolic phenotypes, the authors show that high metal exposure—especially mercury—is associated with alte…	Sediment-associated bacterial communities (16S rRNA); community-level metabolites and lipids	Derwent Estuary, Tasmania, Australia (site map provided; individual coordinates not stated in extracted text)	Sediment cores: n=6 per site; top 1 cm sections; metabolomics aliquots (3 cores frozen for metabolites; 3 pooled for sequencing/chemistry)	9	Sediment (microbial community metabolites and lipids); DNA for bacterial surveys	Metabolomics: combined targeted + untargeted; Lipidomics: untargeted; Genomics: 16S amplicon	Modified QuEChERS extraction; LC–MS workflows (details in supplementary); internal standards L-phenylalanine 13C and succinic acid 13C2; ChemRICH, MetaboAnalyst, SIMCA; pathway analysis using Bacillus subtilis library	Sediment metals/metalloids (Zn, Hg, As, Cd, Cu, Pb) and indications of hydrocarbons/sulphuric acid metabolites at highly contaminated sites	Sediment; matched water quality metadata from monitoring program	Estuary zone/site; particle size; organic content; environmental predictors (Hg, sand fractions, TOC, 16S copies) via BEST/BIOENV and DistLM/dbRDA; outlier site removed	Biological blanks; pooled biological QC (PBQC); internal standards; log/UV scaling; CV-ANOVA validation for PLS-DA models; compositional filtering of 16S data	Differential patterns via validated PLS-DA, ChemRICH enrichment, pathway analysis with FDR; internal standards used in extraction/normalisation	Field setting with complex legacy contamination (metals + hydrocarbons/sulphur) assessed; synergy/antagonism not formally tested but co-occurrence discussed	Outlier site removed; inferred function vs realised phenotype limitations; limited to single sampling campaign; reliance on databases for pathway mapping	Genomic data at NCBI Bioproject PRJNA611638; other data on request	Not stated in extracted text	Derwent Estuary Program water quality monitoring data used for site selection/context	Metabolomics in Ecotoxicology and Environmental Science	Metabolomics in Ecotoxicology and Environmental Science
	Primary research	A multi-omics based ecological analysis of coastal marine sediments from Gladstone, in Australia's Central Queensland, and Heron Island, a nearby fringing platform reef.	Beale et al. 2017	https://doi.org/10.1016/j.scitotenv.2017.07.184	This study applies a multi‑omics approach (metagenomics, metabolomics, and chemical profiling) to assess how anthropogenic contamination in and around Gladstone Harbour influences sediment microbial communities and ecosystem health, compared with offshore reef systems. By integrating microbial community composition with metabolic and chemical signals, the work demonstrates that metals, nutrients,…	Sediment-associated microbial communities (bacteria; 16S rRNA sequencing)	Not reported as explicit lat/long in captured text; sites shown on map (Fig. 1) and described by named locations.	Metabolomics: sediments analysed in triplicate; metals extraction in triplicate; includes multiple core depth horizons (0,10,20,30 cm where available).	9 sampling sites across ecosystems; cores sectioned by depth (up to 4 horizons).	Sediment (no animal tissue).	Untargeted GC–MS community metabolomics; metagenomics (16S); chemical analyses targeted for specific contaminants.	Untargeted GC–MS metabolomics using methanol:water extraction, bead-beating, derivatisation (methoxyamine + BSTFA/TMCS); metabolites identified with NIST/Fiehn/Golm libraries + Kovats indices; MSI framework cited.	Trace metals; ECCs (e.g., estrogens incl. 17α-ethynylestradiol) and sterols; PAHs (measured but largely below detection).	Sediment plus surface water physico-chemical and discrete nutrients (used as contextual variables; surface water excluded in some multivariate merges).	Controls/adjustments include TOC/particle size characterisation; organic pollutants normalized to 1% TOC; depth horizons; multivariate integration with SIMCA; rarefaction of sequence reads to equal depth per sample.	Procedural blanks (metabolomics); internal standard adonitol RSD (~8.3%); DModX outlier screening; spiked recoveries reported for organic pollutant method; sequencing quality filtering and chimera removal; rarefaction.	Significant metabolites via ANOVA with Benjamini–Hochberg adjustment; metabolite IDs via reference libraries and retention indices; internal standards used (adonitol; alkane series for RI).	Multiple stressors discussed (metals, ECCs, geomorphology, potential thermal/photo stress); primarily a correlative field assessment rather than explicit synergism/antagonism testing.	Notes some models weak predictive capability (e.g., depth analysis) due to sampling distribution/bias; need more work to confirm sources (e.g., offshore estrogen signals).	Metagenomics raw reads deposited in NCBI SRA BioProject SRP105345	Yes – cites Metabolomics Standards Initiative (Fiehn et al., 2007) for identification standards.	Uses guideline frameworks (ANZG water/sediment guidelines); land use overlay shown on map; otherwise no major third-party dataset in captured text.	Metabolomics in Ecotoxicology and Environmental Science	Metabolomics in Ecotoxicology and Environmental Science
	Primary research	Seasonal metabolic analysis of marine sediments collected from Moreton Bay in South East Queensland, Australia, using a multi-omics-based approach	Beale et al. 2018	https://doi.org/10.1016/j.scitotenv.2018.03.106	Wet vs dry season field sampling of Moreton Bay sediments; integrates 16S metagenomics and untargeted GC–MS community metabolomics with physicochemical data and third-party monitoring to separate seasonal drivers from pollutant stress.	Sediment microbial communities (bacteria; 16S rRNA) and community metabolite profiles	Moreton Bay, SE Queensland, Australia; site coordinates not provided in extracted text (site map with numbered sites)	Sediment metabolomics in triplicate; metals in triplicate; wet season samples missing for sites 8–9; multiple sites pooled for seasonal comparisons	9	Sediment	Metabolomics: untargeted GC–MS; pollutants screened by untargeted LC–MS using PCDL; Genomics: 16S amplicon	Untargeted GC–MS metabolomics with adonitol internal standard; MetaboAnalyst for pathway analysis; METAGENassist for metagenomics feature tests; SIMCA for multivariate; LC–MS screening with PCDL and internal standards	Trace metals and organic pollutants screened; all below guideline trigger/effect thresholds; emphasis that nutrients/organic matter/light are primary stressors	Water (physico-chem and nutrients) and sediment (TOC, grain size, metals, metagenomics, metabolomics)	Season (wet/dry); habitat type; auxiliary monitoring data to control non-rainfall stressors; TOC normalization; sequence rarefaction	Procedural blanks (n=7); internal standard RSD; DModX outlier screening; sequencing QC and chimera removal; rarefaction; spiked recoveries for LC–MS standards	Yes; volcano plots with BH-adjusted p-values; pathway topology analysis; internal standards used; library/RI identification	Multiple interacting drivers (seasonality, nutrients, light, minor pollutants) assessed; synergy/antagonism not explicitly quantified	Single sampling event per season; wet season not collected for 2 sites; some site clustering unclear without supervision	16S data deposited to NCBI SRA BioProject SRP105345	Yes (MSI referenced for metabolomics identification/standards)	Healthy Land and Water (EHMP) monitoring data used as auxiliary dataset	Metabolomics in Ecotoxicology and Environmental Science	Metabolomics in Ecotoxicology and Environmental Science
	Primary research	Multi-omics eco-surveillance of complex legacy contamination with a locally adapted estuarine invertebrate.	Hillyer et al. 2023	https://doi.org/10.1016/j.envpol.2022.120993	This study applies multi‑omics eco‑surveillance (metabolomics, lipidomics, and proteomics) to a locally adapted estuarine invertebrate (sipunculid/peanut worm) to resolve mechanisms of toxicity, bioavailability, and adaptation under complex legacy contamination by metals and PAHs. It reveals that functional phenotypes varied non‑linearly with exposure, with the strongest oxidative stress, sulphur…	Sipunculid peanut worms (Sipuncula; Annelida)	Derwent Estuary, Hobart, Tasmania, Australia; general coordinate 42.8000, 147.3000; site-specific GPS not provided in extracted text	Sipunculids: NTB5 n=5, NTB13 n=5 in metabolomics/lipidomics; sediment cores n=3 pooled per site for sediment quality; multiple grabs per site (≥5) for organisms	9 sampled; sipunculids present at 5	Whole organism tissue for multi-omics; sediment for quality	Untargeted metabolomics/lipidomics/proteomics (as multi-omics eco-surveillance; tissue metals not measured here)	MetaboAnalyst v5 + SIMCA v17; ChemRICH enrichment; pathway analysis with KEGG matches using C. elegans library; PRIMER/PERMANOVA with BEST and DistLM/dbRDA	Sediment metals (Zn, Hg, Cd, Pb, Cu, As) and PAHs (naphthalene highlighted)	Sediment; water quality context from monitoring	Exposure ranking by site; environmental predictors (Cu, Hg, clay/silt, DO); size/weight differences considered as potential confounder	Zero treatment (1/5 min); scaling/transform; outlier removal; model validation with CV-ANOVA; proteomics volcano thresholds	Significance via CV-ANOVA validated multivariate models, ChemRICH, pathway analysis with FDR; protein significance thresholds (P<0.05 and |log2FC|); standards for MS not detailed in extracted text	Complex field co-exposure (metals + PAHs) discussed; synergy/antagonism not explicitly tested but combined oxidative stress responses interpreted	Limited replication and opportunistic sampling; no spare biomass for tissue metals; size/age/sex confounding cannot be resolved	Data available on request	Not stated in extracted text	Derwent Estuary Program monitoring data used for site selection/context	Metabolomics in Ecotoxicology and Environmental Science	Metabolomics in Ecotoxicology and Environmental Science
	Review	Omics-based ecosurveillance for the assessment of ecosystem function, health, and resilience.	Beale et al. 2022	https://doi.org/10.1042/ETLS20210261	This review argues that traditional, target‑based environmental monitoring is inadequate for capturing the complexity of environmental stressors and their biological effects, particularly under chronic and mixed contaminant exposure. It introduces omics‑based ecosurveillance as a systems‑level approach that integrates untargeted chemical analysis with molecular indicators of organism and ecosyste…	n/a - review paper	n/a - review paper	n/a - review paper	n/a - review paper	n/a - review paper	n/a - review paper	n/a - review paper	n/a - review paper	n/a - review paper	n/a - review paper	n/a - review paper	n/a - review paper	n/a - review paper	n/a - review paper	n/a - review paper	n/a - review paper	n/a - review paper	Metabolomics in Ecotoxicology and Environmental Science	Metabolomics in Ecotoxicology and Environmental Science
	Review	Bioaccumulation/bioconcentration of pharmaceutical active compounds in aquatic organisms: Assessment and factors database.	Gómez-Regalado et al. 2023	https://doi.org/10.1016/j.scitotenv.2022.160638	his review synthesizes global evidence on the bioaccumulation and bioconcentration of pharmaceutical active compounds (PhACs) in aquatic organisms, showing that uptake is highly species‑, organ‑, and compound‑specific and strongly influenced by environmental and experimental factors such as temperature, pH, and exposure route. It demonstrates that field‑derived bioaccumulation factors (BAFs) are …	n/a - review paper	n/a - review paper	n/a - review paper	n/a - review paper	n/a - review paper	n/a - review paper	n/a - review paper	n/a - review paper	n/a - review paper	n/a - review paper	n/a - review paper	n/a - review paper	n/a - review paper	n/a - review paper	n/a - review paper	n/a - review paper	n/a - review paper	Metabolomics in Ecotoxicology and Environmental Science	Metabolomics in Ecotoxicology and Environmental Science
	Primary research	Partitioning of PFAS to serum, tissues, eggs, and hatchlings of an Australian freshwater turtle.	Vardy et al. 2024	https://doi.org/10.1016/j.jhazmat.2024.133885	Field biomonitoring study assessing PFAS in water and in Emydura macquarii macquarii turtles across impact/control/reference sites; quantifies serum PFAS in males and females, tissue partitioning in females, and maternal transfer into eggs and hatchlings; calculates tissue-to-blood ratios and bioaccumulation factors.	Freshwater turtle Emydura macquarii macquarii (males and females; eggs and hatchlings)	Sites not explicitly provided; impact site in coal-mined/industrial area; control ~4.5 km away hydrologically separated; reference ~95 km away agricultural area same catchment/elevation.	Water: impact site triplicate at Aug 2018 and May 2021 (+ single Sep 2021); control triplicate May 2021 (+ single Sep 2021); reference single Sep 2021. Serum: female impact n=4 (July) + n=5 (Sep); male impact n=5 (Dec); control females n=1 (June) and n=3 (Sep); control males n=3 (Dec); reference males n=5, females n=5 (Dec/Sept as described). Tissue (female Sep): n=5 for heart/kidney/ovary/liver/…	3	Surface water; serum (male/female); female tissues (heart, kidney, ovary, liver, muscle, fat); feces; yolk/albumin/shell; hatchlings	Targeted PFAS only (serum 43 PFAS; water Σ28/Σ30; tissues/eggs/hatchlings open-scope PFAS method)	No metabolomics; analytical chemistry focus on PFAS partitioning, TBR and BAF calculations; statistical tests include MANOVA, t-test, Mann-Whitney.	PFAS classes in water and biota: PFSAs, PFCAs, FASAs, FTSs; PFOS dominant in turtles (~90% of total); PFHxA dominant in water but not in tissues/serum; includes 8Cl-PFOS in serum; reports FBSA/FHxSA/FOSA in serum.	Water only (PFAS); no sediment/soil analyses reported in main methods.	Site (impact/control/reference); sex; reproductive status (oviducal eggs vs none); tissue type; blood content adjustment for tissues; chain length classifications; uses average May+Sep 2021 water for BAF calculation.	Water PFAS by two NATA-accredited labs (ALS primary, Eurofins secondary) with interlaboratory QC; field blanks, blind duplicates; serum PFAS by QAEHS using isotope dilution and LOQs from 7 replicates; tissues/eggs/hatchlings PFAS by QLD Health FSS (NATA) with LOR from 10 spikes; blood-adjustment using literature blood fractions.	Yes: isotope dilution quantification; statistical significance via MANOVA/t-tests/Mann-Whitney; nondetect handling uses half LOR for averages.	Primarily PFAS mixtures in field; notes limitations of water-only monitoring and presence of PFAS not detected in water but in turtles, implying mixture complexity.	Small sample sizes; whole-body PFAS estimates underestimates (not all tissues sampled); BAF uncertainty due to exposure history and low water detection; blood-content confounding addressed via adjustment; some analytes not in water suite (e.g., FBSA/FHxSA/8Cl-PFOS).	Data will be made available on request.	Not applicable (not metabolomics); uses EPA MDL procedure for LOR/LOQ.	Blood content fractions from Stecyk et al. for blood adjustment; serum:water ratio from literature; two external labs for water PFAS; QLD Health FSS for tissue PFAS.	Metabolomics in Ecotoxicology and Environmental Science	Metabolomics in Ecotoxicology and Environmental Science
	Review	Bioaccumulation and bioelimination of per-and polyfluoroalkyl substances in aquatic organisms: a review.	Yu et al. 2025	https://doi.org/10.1016/j.jwpe.2025.108065	This review synthesizes global evidence showing that PFAS bioaccumulation in aquatic organisms is strongly governed by chemical structure, with longer‑chain compounds, sulfonic acid head groups, and ether linkages generally exhibiting higher bioconcentration and longer biological half‑lives in tissues such as liver, brain, and gonads. It further demonstrates that bioelimination and biotransformat…	n/a - review paper	n/a - review paper	n/a - review paper	n/a - review paper	n/a - review paper	n/a - review paper	n/a - review paper	n/a - review paper	n/a - review paper	n/a - review paper	n/a - review paper	n/a - review paper	n/a - review paper	n/a - review paper	n/a - review paper	n/a - review paper	n/a - review paper	Metabolomics in Ecotoxicology and Environmental Science	Metabolomics in Ecotoxicology and Environmental Science
	Review	Co-exposure of mercury and microplastics in aquatic food webs: A review of sources, bioaccumulation, and ecotoxicological risks.	Wang et al. 2026	https://doi.org/10.1016/j.marpolbul.2025.118882	This review synthesises evidence from 92 studies showing that microplastics can act as vectors for mercury, enhancing its bioavailability, bioaccumulation, and toxicity across aquatic food webs, particularly through synergistic rather than additive effects. Co‑exposure is associated with higher mercury burdens in fish, oxidative stress, neurodevelopmental and reproductive impacts, and elevated hu…	n/a - review paper	n/a - review paper	n/a - review paper	n/a - review paper	n/a - review paper	n/a - review paper	n/a - review paper	n/a - review paper	n/a - review paper	n/a - review paper	n/a - review paper	n/a - review paper	n/a - review paper	n/a - review paper	n/a - review paper	n/a - review paper	n/a - review paper	Metabolomics in Ecotoxicology and Environmental Science	Metabolomics in Ecotoxicology and Environmental Science
	Primary research	Forever chemicals don't make hero mutant ninja turtles: Elevated PFAS levels linked to unusual scute development in newly emerged freshwater turtle hatchlings (Emydura macquarii macquarii) and a reduction in turtle populations	Beale et al. 2024	https://doi.org/10.1016/j.scitotenv.2024.176313	This study investigates how PFAS (per- and polyfluoroalkyl substances) contamination affects Australian freshwater turtles (Emydura macquarii macquarii) across three sites with varying PFAS concentrations The PFAS-impacted site showed a dramatic lack of juvenile turtles (1.8% vs 17% at reference site), indicating reduced recruitment and potential population decline	Freshwater turtle, Emydura macquarii macquarii	No, site is part of an investigation so could not be disclosed	13 turtles used for part 1 (assessment of adult turtles) and 15 used for part 2 (assessment of eggs)	1	Muscle, heart, kidney, overy, liver, brain and eggs	Targeted and untargeted	LC–QqQ-MS	range of metals and PFAS	Yes	Paper focussed on PFAS concentrations	Blanks, pooled QC samples and amino acid and organic acid standard mixtures were prepared as samples and run at the beginning and after every 10 samples within the analytical sequence.	PFAS-exposed turtles exhibited significant metabolic disruptions affecting amino acid and lipid metabolism, energy production, and oxidative stress responses. Protein biomarkers indicated early disease progression despite no visible abnormalities Gravid females from contaminated sites had altered egg composition, particularly magnesium-to-calcium ratios, potentially affecting eggshell strength Hi…	Paper focussed on PFAS concentrations	None directly, authors do note that omics is a new technique that has not been used to inform regulatory monitoring and decision-making before. Also, the emerged hatchlings were significantly larger in terms of length at the PFAS impacted site compared to the reference site (mean difference 0.13 ± 0.03 cm; p-value ≤0.001) and control site (mean difference 0.40 ± 0.02 cm; p-value ≤0.001) hatchling…	Data is available on request.	no		Metabolomics in Ecotoxicology and Environmental Science	Metabolomics in Ecotoxicology and Environmental Science
	Primary research	Metabolic disruptions and impaired reproductive fitness in wild-caught freshwater turtles (Emydura macquarii macquarii) exposed to elevated per- and polyfluoroalkyl substances (PFAS).	Beale et al. 2024	https://doi.org/10.1016/j.scitotenv.2024.171743	Field biomonitoring and omics-based ecosurveillance of freshwater turtles from PFAS-impacted, control, and reference sites in Queensland; integrates serum PFAS, clinical biochemistry, hormones, and multi-omics (metabolomics, lipidomics, proteomics) to assess metabolic disruption and reproductive fitness impacts.	Eastern short-necked turtle (Emydura macquarii macquarii) as primary model (other species present)	Impacted site location not disclosed; control site 4.9 km from impacted (hydrologically disconnected); reference site 94 km from impacted; all within same climatic zone in Queensland	Target 5F+5M per site; achieved: Impacted (5F,5M), Reference (5F,5M), Control (3F,3M). Two sampling events in 2021 (Sept females; Nov males).	3	Blood-derived matrices: serum (PFAS, hormones, metabolomics/lipidomics/proteomics), plasma/whole blood for clinical biochemistry; plus water and sediment sampled for PFAS and non-targeted screening	PFAS targeted (47 PFAS). Metabolomics: targeted CCM (dMRM) + untargeted polar metabolomics. Lipidomics: untargeted. Proteomics: SWATH-MS (DIA). Additional non-targeted contaminant screening (LC–HRMS/GC–MS).	One-pot extraction from 100 µL serum with Captiva EMR; internal standards 13C-phenylalanine and 13C2-succinic acid. Targeted CCM via Agilent 6470 LC–QqQ dMRM. Untargeted polar metabolites and lipids via Agilent 6546 LC–QToF with curated PCDLs (AutoMS/MS on pooled PBQC), METLIN PCDLs and in-house PCDLs (score threshold 0.8). Proteomics via Sciex 6600 QTOF SWATH-MS; DIA-NN processing; proteins anno…	Serum PFAS (47 PFAS; PFOS dominant). Surface water PFAS at sites. Non-targeted screening of water/sediment also identified herbicides/pesticides and low-level PAHs/PCBs (appendix).	Water and sediment at impacted/control sites for non-targeted screening; surface water PFAS metrics; sediments screened for PCBs/PAHs/TOC.	Site classification (impacted/control/reference). Sex analysed separately due to different sampling times; GLMMs for PFAS vs physiology/biochemistry/hormones with site/sex random effects; multivariate SIMCA + MetaboAnalyst; missing-value filtering (>50% removed) and imputation (1/5 min).	PFAS quantification by isotope dilution; QC samples incl. SRM NIST 1957, pooled serum, duplicates, procedural blanks; method detection limits and recoveries reported. Hormone analysis uses heavy-labelled hydrocortisone-d4 ISTD (RSD 2.9%). Omics internal standards RSDs reported; pooled PBQC for AutoMS/MS; proteomics FDR 1%.	Yes: Omics significance by fold-change ≥2 and BH-adjusted p≤0.05; pathway enrichment via MetaboAnalyst + Paintomics; PFAS and hormones use internal standards; PFAS recoveries and FDR controls; proteomics uses FDR and statistical tests.	Yes, addresses chronic PFAS mixtures and discusses cumulative multiple sublethal stressors; non-targeted screening suggests few other chemicals of concern at PFAS sites; highlights guideline limitations for mixtures and higher trophic consumers.	Impacted site cannot be disclosed; small sample sizes (especially control); male/female sampled at different times (potential seasonal bias); need more sites/time points and more animals; non-model functional annotation limits systems interpretation; environmental ‘noise’ in field omics.	Data available on request; turtle draft genome available (BioProject PRJNA879275; accession JAOCMD000000000) and referenced.	Yes (MSI replicates guidance cited; also mentions environmental metabolomics reporting context requirements)	Clinical biochemistry by IDEXX Pathology; non-target screening by Queensland Health Forensic and Scientific Services (QHFSS); site selection definitions from QLD Govt manuals; impacted site water PFAS history referenced from reports/submissions.	Metabolomics in Ecotoxicology and Environmental Science	Metabolomics in Ecotoxicology and Environmental Science
	Primary research	Bioaccumulation and metabolic impact of environmental PFAS residue on wild-caught urban wetland tiger snakes (Notechis scutatus).	Lettoof et al. 2023	https://doi.org/10.1016/j.scitotenv.2023.165260	Field ecosurveillance study linking PFAS exposure (water) and bioaccumulation (liver) to whole-organism health and multi-omics responses (metabolomics + lipidomics) in a wetland top predator (tiger snake) across an urban contamination gradient (4 Perth wetlands).	Western tiger snake (Notechis scutatus occidentalis / Notechis scutatus)	Herdsman Lake (31°55′12″S, 115°48′19″E); Bibra Lake (32°05′32″S, 115°49′27″E); Lake Joondalup (31°45′34″S, 115°47′33″E); Loch McNess/Yanchep NP (31°32′44″S, 115°40′50″E)	Snakes: 35 total (18 male, 17 female) from 4 wetlands; target 5M+5F per site except Yanchep (3M+2F). Water: 2 opposite sides per lake (Bibra 1 side), with field blanks at 3 locations and field replicates at 3 locations.	4 wetlands	Liver (PFAS + fat content); muscle, adipose (fat pad), gonads (omics); surface water for PFAS	PFAS: targeted quantification; Metabolomics: targeted (CCM) + untargeted polar metabolomics; Lipidomics: untargeted	Targeted CCM via Agilent 6470 LC–QqQ–MS (Agilent dMRM database; ion-pair RP with TBA). Untargeted polar metabolites via Agilent 6546 LC–QToF (ESI +/-) with curated PCDL (AutoMS/MS on PBQC) and METLIN + in-house PCDL. Lipids via Agilent 6546 LC–QToF with Poroshell HPH-C18, METLIN Lipids PCDL + in-house PCDL.	PFAS in water (30 PFAS by USEPA Method 537) and liver (28 PFAS by UHPLC/HR-MS; PFOS dominant). Also discusses co-occurring legacy metals/metalloids at wetlands (from prior work).	Surface water PFAS analysed (lake water).	Site; sex; body size (SVL) and body condition (scaled mass index); statistical models with site as random effect; omics regression/enrichment against liver PFAS; pathway analysis using Gallus gallus library.	Field blanks + field replicates for water PFAS; isotope dilution quantification; PFOS/PFHxS branched standards for isomers; omics internal standards (13C-phenylalanine, 13C2-succinic acid; d5-TG lipid mix); pooled QC (PBQC) and blank samples; amino/organic acid standard mix QC; reference mass ions and AutoMS/MS on PBQC; data normalization, log-transform and autoscaling; FDR threshold used.	Yes: GLMMs for PFAS–health relationships; multivariate SIMCA + MetaboAnalyst regression/enrichment with FDR≤0.05; internal standards and external standard mix used; pathway impact via MetaboAnalyst.	Yes, field co-exposure context: PFAS in urban wetlands plus other legacy contaminants (metals/metalloids) discussed; suggests possible synergistic impacts (e.g., selenocompound metabolism perturbation, and PFAS may magnify metal effects), but not formally tested as interaction experiment.	High individual physiological variability and site-specific stressors create ‘noise’; small sample size reduces statistical power after FDR; recommends sampling more individuals and measuring metals to tease antagonistic effects; limited reptile pathway annotation in metabolomics software.	Data available on request; supplementary tables for QA/QC and results.	Not explicitly stated in extracted sections	PFAS water analysis by Eurofins (USEPA 537) and liver PFAS by Symbio (in-house method); uses prior contaminant datasets for wetlands; satellite imagery from Google Earth Pro.	Metabolomics in Ecotoxicology and Environmental Science	Metabolomics in Ecotoxicology and Environmental Science
	Primary research	It's not all about PFAS: Metal(loid)s are associated with physiological and metabolic changes in a native frog from conservation wetlands.	Lettoof et al. 2025	https://doi.org/10.1016/j.envpol.2025.127097	Field study across 11 Perth wetlands with PFAS gradient; quantified liver PFAS and metals and linked to whole-organism metrics and metabolomics across liver, muscle, fat, gonads/eggs; identifies stronger associations for Zn, Se, Cu than PFAS and derives metabolic points of departure (mPOD) from BMCs.	Motorbike frog Ranoidea moorei (syn. Litoria moorei)	11 wetlands around Perth, Western Australia (no explicit coordinates in extracted text).	97 frogs (54F, 43M) across 11 wetlands; ~4 per sex per site (min 3). Environmental PFAS snapshot: 3 surface water + 5 soil samples per wetland. Metals in liver for all frogs minus one male.	11	Liver (PFAS + metals + metabolomics subsample); thigh muscle, fat pad, gonads/eggs for metabolomics.	PFAS: targeted; metals/metalloids: targeted; metabolomics/lipidomics: untargeted QToF (feature ID in MetaboScape).	Untargeted metabolomics/lipidomics QToF with MetaboScape 2024 identification; MetaboAnalyst 6.0 for filtering/normalization and pathway impact regressions; GLMMs and GAMMs (site random effect); DRomics for benchmark concentration modelling; mPOD derived from first peak of BMC distributions.	Frog liver PFAS: 61 accepted (22 above RL; linear PFOS most abundant). Metals/metalloids: targeted set incl Zn, Se, Cu. Environmental PFAS: water (47 accepted) and soil (75 accepted).	Surface water and soil PFAS quantified (snapshot).	Site random effects; sex; GAMM selection to link contaminants to health metrics; GLMMs linking tissue features to liver contaminants; BMC/mPOD for metabolome responses.	Handling of below-RL values (half limit). Emphasizes MSI environmental context reporting and cautions against post hoc correlations with limited environmental samples. Unannotated features retained for mPOD.	Significance via GLMMs with FDR<0.1; DRomics dose-response/BMC; pathway impacts via regressions. Structural confirmation for some features not done (noted limitation).	Yes: PFAS plus metals assessed; whole-organism metrics mainly associated with Zn/Se/Cu not PFAS; explores mPOD for metals.	No environmental metals measured (budget); limited environmental PFAS sample size; many features unannotated; structural confirmation by spiking out of scope; folliculogenesis/hormonal state may confound females; BMC/mPOD sensitive to exposure range; oxidative stress biomarkers not measured.	Raw data provided in supplementary materials.	Yes (Morrison et al., 2007 MSI environmental context reporting requirements cited)	Wetland PFAS gradient from prior reports; wetlands classification from DBCA datasets; environmental PFAS snapshots; uses published methods and software pipelines.	Metabolomics in Ecotoxicology and Environmental Science	Metabolomics in Ecotoxicology and Environmental Science
	Primary research	Ecosurveillance reveals subtle metabolic effects on the non-native cane toad (Rhinella marina) from low levels of accumulated environmental per- and polyfluoroalkyl substances.	Lettoof et al. 2025	https://doi.org/10.1016/j.envpol.2025.125968	Field study across six SEQ locations along PFAS gradient; quantified PFAS and metals/metalloids in cane toad livers and linked to whole-organism metrics and multi-tissue omics responses.	Cane toad Rhinella marina (adult)	Six creek/river locations around Southeast Queensland (map provided; coordinates not in extracted text).	52 adult toad livers (n=52). Environmental composites per location: water (3 pooled) and soil (5 pooled).	6	Liver (PFAS, metals, CCM + untargeted metabolomics/lipidomics + proteomics); thigh muscle, fat pad, gonads/eggs for CCM metabolomics.	PFAS: targeted (38). Metals/metalloids: targeted (36). Metabolomics: targeted CCM across tissues; liver also untargeted metabolites/lipids. Proteomics: liver.	CCM quantified using LC–QqQ in multiple tissues; liver screened for untargeted metabolites/lipids by QToF; liver proteomics on pellet. Bioinformatics with MetaboAnalyst 6.0 and STRING using regression against liver total PFAS.	Liver PFAS (16 detected above LOD; PFOS dominant, PFDoDA second); liver metals/metalloids (36). Environmental PFAS in water and soil (USEPA 1633).	Water and soil PFAS and metals/metalloids pooled per location.	GLMMs with location and sex as random effects; tested PFAS×metal interactions for some metrics; omics focused primarily on total PFAS.	Nondetect handling (half LOQ); MetaboAnalyst 6.0 filtering/normalization; multiple testing correction (FDR). Analytical lab details: Eurofins for water/soil; QAEHS for liver.	Associations via GLMMs; omics: pathway and chemical enrichment via regression against PFAS with FDR adjustment; some significant FDR signals limited (e.g., male fat glycerophospholipid metabolism).	Yes: PFAS and metals co-measured; weak PFAS×Ni interaction effect on body condition; discusses limitations of current pathway tools for interactions.	Low PFAS burdens vs higher trophic consumers; generally weak metabolic signals; nomadic movements limit BAF estimation; eggs not screened for PFAS so maternal transfer not confirmed; parasite interaction models failed due to zero inflation.	Data will be made available on request.	Not explicit in extracted text	Eurofins Australia (NATA) for PFAS in water/soil; PFAS gradient data partly unpublished; Google Maps base cartography.	Metabolomics in Ecotoxicology and Environmental Science	Metabolomics in Ecotoxicology and Environmental Science
	Primary research	Concentrations of per- and polyfluoroalkyl substances in estuarine systems can vary greatly within tidal cycles (NB not a metabolomics paper)	Singh et al. 2025	https://doi.org/10.1016/j.scitotenv.2025.179196	This study looked at how the concentrations of 44 PFAS changed over 24 hours in three estuaries in Victoria, Australia.Concentrations of ΣPFAS showed between four- and seven-fold differences during the 24-hour sampling period. Environmental measurements showed this was likely due to seawater diluting the concentration of PFAS in the estuary during tidal influxes. Teh data shoew that randomly time…	none	Not in paper but can be requested from authors	Duplicate, one-litre samples were taken every hour for each of the three sites	3	n/a	n/a	LC–QqQ-MS	44 types of PFAS	Water	pH, temperature, tide height, redox value, dissolved oxygen, total dissolved solids and electrical conductivity	Each batch of samples included multiple QA/QC samples. First, a method blank of PFAS-free Milli Q water spiked with internal standards and surrogate solution (containing PFAS congeners) was used to detect, and control for, any contamination stemming from the sample preparation process. Secondly, a laboratory control sample was prepared by spiking PFAS-free MilliQ water with internal standard, sur…	n/a - not a metabolomics paper	n/a - not a metabolomics paper	Authors note that that correlations detected in this paper between PFAS concentrations and tide height could be just that, and correlations are not causation.	Data is available on request.	n/a - not a metabolomics paper		Metabolomics in Ecotoxicology and Environmental Science	Metabolomics in Ecotoxicology and Environmental Science
	Primary research	Untargeted NMR-based metabolomics for field-scale monitoring: Temporal reproducibility and biomarker discovery in mosquitofish (Gambusia holbrooki) from a metal(loid)-contaminated wetland	Melvin et al., 2018	https://doi.org/10.1016/j.envpol.2018.09.071	Field-scale untargeted 1H NMR metabolomics to test temporal reproducibility and biomarker discovery in fish from a contaminated antimony-processing wetland vs reference wetland; two sampling events (June vs Oct 2017) capturing rainfall/temperature differences and associated changes in water and fish metal(loid) burdens.	Mosquitofish Gambusia holbrooki (juvenile female)	Urunga Wetland (30°30′19″S, 153°00′35″E) and Reference Wetland (27°57′58″S, 153°22′40″E)	Metabolomics: 18 fish per site per event (June & Oct 2017) = 72 samples. Water metals: triplicate per site per event (n=3). Fish metals: 12 fish per site (June) and 10 per site (Oct) for ICP-MS.	2	Whole-body fish polar metabolite extracts (and lipid fraction separated but focus on polar metabolites); water for metal(loid) chemistry	Untargeted metabolomics (1H NMR); targeted metals/metalloids by ICP-MS	Modified Bligh–Dyer extraction with methanol:chloroform; 1H NMR at 800 MHz (Bruker Avance III HDX) with TSP reference; binning (0.02 ppm) and metabolite assignment via Chenomx + HSQC confirmation with HMDB; multivariate stats in MetaboAnalyst 3.0 (PCA, oPLS-DA) and Wilcoxon rank-sum with FDR 0.05.	Water and fish metal(loid)s including Sb, As, Cd, etc (suite via ICP-MS); focuses on antimony processing legacy contamination and co-occurring metals/metalloids.	Water analysed (metals/metalloids).	Controlled for sex by using juvenile females; two seasonal/climatic timepoints; site differences assessed with multivariate models; normalized to fish weight and removed water spectral region.	ICP-MS: external calibration multi-element standard; in-line internal standards (Sc, Y, In, Tb, Bi); CRMs (SLRS-6 river water; DOLT-5 dogfish liver) with typical recoveries 80–120%. NMR: TSP internal reference; D2O lock; standardized acquisition; normalization and scaling; FDR correction.	Yes: significant metabolites by Wilcoxon rank-sum with FDR<0.05; NMR reference standard TSP; CRMs and internal standards for ICP-MS.	Field mixture context: contaminated wetland has Sb processing legacy with co-occurring metals/metalloids; study discusses confounding variables and mixture effects but does not quantify synergy/antagonism.	Temporal/seasonal variability affects quantitative outcomes; cautions against broad temporal comparisons; need more sampling and paired metal analyses to establish dose-response; field variability complicates attribution.	Supplementary data via DOI.	Not stated (uses environmental metabolomics recommendations from literature; MetaboAnalyst used).	HMDB used for metabolite verification; ANZECC/ARMCANZ trigger values cited; BOM rainfall data referenced.	Metabolomics in Ecotoxicology and Environmental Science	Metabolomics in Ecotoxicology and Environmental Science
	Book Chapter	Environmental assessment of metal impacted soils using community metabolic profiling	Jones 2022	https://doi.org/10.1016/B978-0-12-816460-0.00017-4	This book chapter describes the use of 1H-nuclear magnetic resonance spectroscopy and gas chromatography-mass spectrometry-based metabolomic to assess the changes in biochemical profiles of microbial communities living in contaminated soils with very different physicochemical characteristics (e.g., levels of metal contamination underlying geology, pH, and soil type) is presented. Multivariate pat…	Study assesses the soil metabolome as a whole, individual species were not assessed	not listed in the chapter directly but can be found in the paper the chapter is based on at https://doi.org/10.1002/etc.2418	three replicates per site	11	na	untargeted	NMR and GC-MS	Soils tested for barium managanese copper lead calcium aluminum cadmium and zinc	soil	metals as well as pH (soil and pore water) total organic carbon and moisture content	sample blanks were run but this was a proof of concept paper so QA/QC was limited	PCA of the 1H NMR data showed that replicate samples of each site cluster together, indicating good reproducibility. Although some of the sites overlap in the PCA, two sites clustered together, away from the other sampling locations. Because of the large geographic and geological differences between the sites, it is likely that their metabolic similarity is a response to their similar pollution p…	Metals were the main stressor in this study	Metabolites in soils are from microbial or plant origin and are not present in standard databases. This led to some features in the data being unidentified. No other omics technique was used.	Data is available on request.	no		Metabolomics in Ecotoxicology and Environmental Science	Metabolomics in Ecotoxicology and Environmental Science
	Method / Protocol	Marine Metabolomics: a Method for Nontargeted Measurement of Metabolites in Seawater by Gas Chromatography-Mass Spectrometry	Sogin et al. 2019	https://doi.org/10.1128/msystems.00638-19	This study develops a new method to remove salt from marine samples without altering the metabolome. The method is called SeaMet and detects metabolites down to nanomolar concentrations from less than 1 ml of seawater. The authors test the method and show it provides a nontargeted and quantitative analysis of marine metabolites, thus providing new insights into nutrient cycles in the oceans.	Marinobacter adhaerens and the in situ metabolome of coral reef and mangrove sediment porewaters	Yes, Carrie Bow Cay (16°04′59″N, 88°04′55″W) and Twin Cayes (16°50′3″N, 88°6′23″W), Belize	replicates were used but numbers varied in different sections, Metabolite mixture aliquots (n = 5, or 6 for SPE); Replicate cultures (n = 3) of Marinobacter adhaerens, Replicate porewater profiles were collected from coralline (n = 4) and mangrove (n = 6) sediments	n/a, it's a method development paper	coral reef and mangrove sediment porewaters	untargeted	GC-MS	none	seawater and sediment porewater	n.a. this is a method developent paper looking at the best way to remove salts from seawater samples	Sample replicates (see column H) and QC samples (n = 3) to control for technical variation in the cell culture experiment. These were made by were prepared by combining 0.25 μl of each culture supernatant and an extraction blank generated by drying down 0.5 ml of MQ water. Metabolite recovery was assessed by adding 2.5 nmol of the metabolite in the mix to the solution and calculating the variatio…	Yes, 113 metabolite standards in seawater, representing major metabolite groups involved in primary metabolic pathways. Data is in the supplementary information of this paper	There was no stressor tested	Authors note the paucity of annotated marine metabolites in metabolomics databases	All metabolite profile data are publicly available at MetaboLights (https://www.ebi.ac.uk/metabolights/) under identification numbers MTBLS826, MTBLS839, MTBLS843, MTBLS844, MTBLS848, and MTBLS849.	no		Metabolomics in Ecotoxicology and Environmental Science	Metabolomics in Ecotoxicology and Environmental Science
	Primary research	QuEChERS Extraction and Simultaneous Quantification in GC-MS/MS of Hexahydrocannabinol Epimers and Their Metabolites in Whole Blood, Urine, and Oral Fluid	Di Trana et al. 2024	https://doi.org/10.3390/molecules29143440	In this paper the authors developed and validated a comprehensive GC-MS/MS method to quantify various hexahydrocannabinol (HHC) epimers and their metabolites in whole blood, urine, and oral fluid. A novel QuEChERS extraction protocol was optimized selecting the best extraction conditions suitable for all the three matrices.	none	n/a	Sample replicates were - whole blood (n = 4), urine (n = 3), and oral fluid (n = 3).	n/a, it's a method development paper	n/a, it's a method development paper	Targeted but not metabolomics focussed	GC-QQQ-MS	none	n/a	n/a	Spiked calibrators, quality control samples and related working standard solutions concentrations for all the target analytes in the three matrices studied	yes, standards of all ten compounds investigated were used.	There was no stressor tested		Yes, in the supplementary information	n/a - not a metabolomics paper		Metabolomics in Ecotoxicology and Environmental Science	Metabolomics in Ecotoxicology and Environmental Science
	Primary research	Investigating the biochemical effects of heat stress and sample quenching approach on the metabolic profiling of abalone (Haliotis iris).	Nguyen et al. 2021	https://doi.org/10.1007/s11306-021-01862-8	This study used GC–MS metabolomics to show that acute heat stress (24 °C) causes major metabolic disruption in Haliotis iris, particularly in haemolymph, including oxidative stress, altered amino acid and fatty acid metabolism, and a shift from aerobic to anaerobic energy pathways. It also demonstrated that dry ice is a reliable and safer field alternative to liquid nitrogen for quenching abalone…	Abalone (Haliotis iris)	N/a (laboratory exposure)	Twenty adult abalone exposed to 14°C vs 24°C for 24 h; haemolymph and muscle sampled; four quenching protocols compared (liquid nitrogen, dry ice, cold methanol solution, normal ice).		Haemolymph and muscle tissue	Targeted	GC–MS-based metabolomics (central carbon metabolites)			Temperature treatment (14 vs 24°C), exposure duration (24 h), quenching protocol.		Reported significant metabolite differences (10 in muscle; 46 in haemolymph) under heat stress; standards not specified	Method + stressor comparison (heat + quenching)	Field sampling logistics; quenching protocol can influence profiles (especially muscle).	Open access paper; details in supplementary information (not extracted).			Metabolomics in Ecotoxicology and Environmental Science	Metabolomics in Ecotoxicology and Environmental Science
	Poster	Evaluation of Tissues Preserved in RNAlater for Metabolomics Analysis.	Nguyen et al. 2025		Poster evaluating the effect of RNAlater preservation on untargeted metabolomics (Metabolon Global Discovery Panel), including reproducibility, coverage, and whether biological signatures are maintained vs fresh frozen.						Untargeted metabolomics					Assessed reproducibility, sensitivity, biochemical/pathway coverage; instrument contamination/carryover (as described)				Resource requires form download; underlying dataset not publicly linked in summary.			Metabolomics in Ecotoxicology and Environmental Science	Metabolomics in Ecotoxicology and Environmental Science
Wild Caught samples	Primary research	Persistent pollutant exposure impacts metabolomic profiles in polar bears and ringed seals from the High Arctic and Hudson Bay, Canada	Remili et al. 2025	DOI: 10.1016/j.envres.2025.120862	This study explores the relationships between contaminants and metabolites in the polar bear and ringed seal liver. It discusses the metabolites with the highest VIP scores in discriminating profiles between the two species and suggests which features are likely explained by differences in diet. It then uses spearman correlation to correlate specific features with PFAS compounds.	Polar bears and ringed seals	No coordinates but 2 regions are Western Hudson Bay (Canada) and Baffin Bay(High Artic/Greenland)	Polar bear: 15 replicates each from two different regions Ringed seals: 15 replicates and 13 replicates from Same two regionsas polar bears.	2	Liver	Targeted	Metabolites: QQQ-HPLC-MS/MS and FI-HPLC-MS/MS	PCBs, OCPs, OCs, PBDEs, HRFs, PFAS and mercury	No	Age and sex determined	Yes. Contaminants: native and mass-labelled standards of all contaminants. several NIST SRM and CRMs (i.e. Whale blubber and Lake Superior fish tissue) used for the different contaminant classes. Metabolites: Method blanks and internal reference material (Salmon liver) as weall as isotopically-labelled and native internal standards were spiked	- Correlation between liver metabolites and PFAS in both species, particularly in lipid metabolism and PC profile. - Metabolite responses were more significant in ringed seals despite a higher concentration of PFAS in polar bears.	Yes the presence of multiple stressors were determined. Spearman correlation was performed with metabolites and contaminants but synergistic/antagonist effects between the contaminants are not discussed.	Storage of samples at -35C to -20C for two years. That POPs concentrations in liver are in wet weight not lipid weight which may underestimate concentrations. That correlations are not cause-effect.	Data is available on request.	No		Wild Caught samples	Wild Caught samples
	Primary research	Metabolomic profiles of the endangered St. Lawrence Estuary beluga population and associations with organohalogen contaminants	Simond et al. 2020	https://doi.org/10.1016/j.scitotenv.2020.137204	This study analysed the metabolites in skin and contaminants from several classes (PCBs, OC, PBDEs, HRFs and SCCPs) in the blubber of 40 beluga males from Eastern Canada. A targeted metabolomics approach is employed and correlations between SCCPs and fatty acids was reported.	Beluga	Authors state that GPS coordinates of the sampling locations were recorded for each beluga but they are not provided.	40 males	3	Skin and blubber	Targeted	QQQ-HPLC-MS	PCBs, OC, PBDEs, HRFs and SCCPs	No	Only analysed males to control for sex, age not determined	Spiked internal standards used for HFR, PCB and OC analyses and recovery reported. External NIST standard (whale blubber) contined PCBs, OCs and PBDEs used. Various releavant internal metabolite standards spiked with skin samples.	The concentrations of Acetylornithine and four fatty acids in the beluga skin was correlated with SCCP concentrations in the blubber. This may indicate disruption to lipid metabolism or amino acid metabolic pathways.	Multiple stressors were analysed but Synergistic effects between contaminants was not discussed	No limitations expressed.	Yes, some data is available in the SI, no statement is made on accessing the data.	No		Wild Caught samples	Wild Caught samples
	Primary research	Lifelong Exposure to PCBs in the Remote Norwegian Arctic Disrupts the Plasma Stress Metabolome in Arctic Charr	Gauthier et al. 2018	https://doi.org/10.1021/acs.est.7b05272	This study investigates the impact of lifelong exposure of PCBs to the plasma metabolome in the Arctic charr (Salvelinus alpinus) in a lake on a remote Norwegian Island, Bjørnøya. Large immature fish from 2 lakes were sampled and plasma was collected for untargeted metabolomics. Authors state the fish from the contaminated lake had changes primarily to the mobilisation of energy substrate and rel…	Fish - Arctic charr (Salvelinus alpinus)	No but map provided with locations of the 2 lakes	10 fish per site, 20 in total	2	Plasma	Untargeted	Hybrid quadruople-Orbitrap LC-MS	PCBs	No	Age and sex determined. Size of fish controlled to large (>400g) immature fish.	Not mentioned	Fish from the contaminated lake had changes to energy substrates, amino acid synthesis, oxidation substrates and gluconeogenesis.	Mention of historic trace levels of other metals but no	The fish in one lake were all smaller than the other lake and this may have influenced the metabolites as well.	Yes, some data is available in the SI, no statement is made on accessing the data.	No	Study references previous study for muscle contaminant concentrations (doi: 0.1016/j.aquatox.2017.03.017	Wild Caught samples	Wild Caught samples
	Primary research	Metabolic signatures associated with environmental pollution by metals in Doñana National Park using P. clarkii as bioindicator	Gago - Tinoco et al. 2014	https://doi.org/10.1007/s11356-014-2741-y	Metal concentrations and the metabolites in several tissues from a species of Crab in Spain are measured in this study. Markers of oxidative stress and energy production are dysregulated in crabs from the polluted sites, however, no correlation with the metals is performed, nor is the potential impact of other contaminants discussed.	Crab - Red Swamp Crayfish (Procambarus clarkii)	No, but the 5 sites were in spain and called: Lucio del Palacio, Matochal, Partido, Ajolí, and Bernabé	3 crabs per site, 15 in total	5	individual organs (digestive gland, muscle, gills, and antennal glad) excised. Total metals content in main crab tissues (digestive gland, muscle, and gills)	Untargeted	QToF-LC-MS/MS	Metals (Cu, Zn, As, Cd)	No		Not mentioned	Energy metabolism dysregulation compared to crabs in reference site. Alterations to metaboltes associated with oxidative damage.	Correlations between them or synergistic effects not dicussed.	Not openely expressed, does discuss how future studies should aim to understand the response of crabs exposed to single metal or other contaminants, but does not discuss the possible impact of other contaminants on metabolome.	Not stated	No		Wild Caught samples	Wild Caught samples
	Primary research	Bioaccumulation and metabolic response of PFAS mixtures in wild-caught freshwater turtles (Emydura macquarii macquarii) using omics-based ecosurveillance techniques	Beale et al. 2022	https://doi.org/10.1016/j.scitotenv.2021.151264	Short communication; preliminary field study demonstrating PFAS mixture bioaccumulation in freshwater turtles and associated serum multi-omics signatures (metabolomics, lipidomics, proteomics) indicating metabolic disturbance despite normal appearance.	Freshwater turtle Emydura macquarii macquarii	Impacted waterway in Queensland not disclosed (confidential). Control site chosen as similar except contamination activities.	Turtles: n=5 total (4 impacted, 1 control). Water PFAS reported: impacted n=6, control n=3 (commercial lab). Omics technical replicates: triplicate for most samples; Samples 2 and 4 in duplicate.	2	Serum (PFAS + metabolomics/lipidomics/proteomics); water PFAS for context	PFAS targeted (LC–MS/MS sMRM, isotope dilution). Metabolomics: targeted CCM + untargeted polar metabolites. Lipidomics: untargeted. Proteomics: SWATH-MS.	One-pot extraction from 100 µL serum with Captiva EMR cartridges. Targeted CCM on Agilent 6470 QqQ; untargeted metabolites/lipids on Agilent 6546 QToF; proteomics on SCIEX 6600 TripleTOF SWATH-MS. ChemRICH + MetaboAnalyst 5.0 for enrichment/pathway impact.	Serum: 49 PFAS; Water: Σ28 PFAS reported (impacted 32.0 µg/L; control 0.011 µg/L). PFOS dominant; FBSA and FHxSA reported in serum.	Water PFAS measured via commercial lab (method not provided); metals screened in water and negligible.	Impacted vs control comparison; limited biological replication led to qualitative fold-change focused interpretation.	PFAS: duplicates; SRM NIST 1957; pooled serum (non-spiked, spiked pre- and post-extraction); procedural blanks; MDL 0.18–1.5 ng/mL; isotope dilution. Omics: stable isotope internal standards (13C-Phe, 15N-Gln, 13C2-succinate, D4-homocysteine) with RSDs reported; most samples triplicate.	Yes; FC thresholds (metabolites/lipids ≥2, proteins ≥1.5) and BH-adjusted p≤0.05 for enriched outputs (qualitative due to n control=1). Standards used (labelled ISTDs; SRM NIST 1957; pooled serum spikes).	Discusses PFAS mixture risk and synergy evidence from literature; metals screened and negligible so focus on PFAS mixture effects.	Very small sample size, especially control (n=1); site location confidential; environmental covariates not analysed; water PFAS analyte list did not include FBSA/FHxSA so comparability limited.	Supplementary data via DOI; QA/QC in Supplementary Information.	Yes (Sumner et al., 2007 minimum reporting standards cited)	Water PFAS by NATA-accredited commercial lab; permits and monitoring context by QLD DES; cites unpublished biota screening data.	Wild Caught samples	Wild Caught samples
	Primary research	Bioaccumulation and impact of maternal PFAS offloading on egg biochemistry from wild-caught freshwater turtles (Emydura macquarii macquarii)	Beale et al. 2022	http://dx.doi.org/10.1016/j.scitotenv.2022.153019	This study investigates PFAS bioaccumulation and maternal offloading in freshwater turtles (Emydura macquarii macquarii) and associated biochemical effects on eggs. PFAS concentrations were higher in eggs than maternal serum, with most PFAS stored in the yolk. Eggs from impacted sites showed altered metabolism, reduced lipid quality, and decreased calcium and immune‑related proteins, highlighting…	Emydura macquarii macquarii (freshwater short-necked turtle)	Not reported (site locations confidential/undisclosed)	Adult females n=13; eggs harvested 58 from 8 turtles; multi-omics on 17 individual eggs (duplicates per turtle; one reference turtle triplicate); PFAS in eggs via pooled composites (5 eggs pooled per maternal turtle; one reference pool used 6 eggs)	3 (impacted, control, reference)	Maternal serum; oviducal eggs fractionated into albumen, yolk, eggshell (plus eggshell for metals)	Both (targeted PFAS; targeted CCM metabolites; untargeted metabolomics, lipidomics; untargeted proteomics; targeted metals)	Targeted CCM: UHPLC–QqQ-MS (Agilent 6470); Untargeted metabolites/lipids: UHPLC–QTOF-MS (Agilent 6546); Eggshell proteomics: SWATH-MS on SCIEX 6600 TripleTOF; Metals: ICP-MS	PFAS (serum Σ45; eggs Σ30); eggshell metals (bulk/trace via ICP-MS)	Not analysed in this paper (site characterization referenced from prior work)	Site category (reference/control/impacted); sample normalization (internal standards + biomass); data transformation/scaling; pooled vs individual egg analyses; controlled handling (flash frozen, -80°C storage)	Blank subtraction; internal standards (Succinic Acid 13C2 for metabolomics; TG-d5 for lipidomics); NATA-accredited PFAS lab for egg PFAS; QA/QC details in Supplementary	Statistics: univariate/multivariate; One-way ANOVA (reported); pathway enrichment/impact (MetaboAnalyst). Quantitation used spiked internal standards; targeted PFAS quantified with isotope dilution.	Primarily PFAS exposure; eggshell metals screened as potential co-stressors but no explicit synergy/antagonism analysis.	Egg maturity/developmental stage unknown (left-censored); small sample size; sites confidential; no direct hatchling/fitness outcomes; recommends controlled incubation/time-series sampling.	Supplementary data available; site/location-specific data restricted due to ongoing investigation.	Yes (Metabolomics Standards Initiative referenced: Goodacre et al., 2007; Morrison et al., 2007)	Yes (pathway databases/tools and literature comparisons; PFAS analyses by external accredited laboratory)	Wild Caught samples	Wild Caught samples
	Primary research	Host–Gut Microbiome Metabolic Interactions in PFAS-Impacted Freshwater Turtles (Emydura macquarii macquarii)	Beale et al. 2022	https://doi.org/10.3390/metabo12080747	Integrated omics study combining faecal 16S rRNA amplicon sequencing and LC–MS metabolomics to infer host vs microbiome vs co-metabolism changes associated with PFAS exposure in wild-caught freshwater turtles.	Emydura macquarii macquarii (freshwater short-necked turtle)	Not reported (site location confidential)	Faecal samples: PFAS-impacted n=5 turtles; reference n=5 turtles (adult females)	2 (PFAS-impacted, reference)	Faeces (metabolomics + microbiome); serum PFAS and clinical biochemistry reported for context	Both (targeted CCM metabolomics + untargeted polar metabolomics; plus microbiome sequencing)	Targeted CCM: UHPLC–QqQ-MS (Agilent 6470); Untargeted metabolites: UHPLC–QTOF-MS (Agilent 6546); Microbiome: MinION 16S rRNA amplicon sequencing; integration via MetOrigin	PFAS in serum (Σ47 PFAS reported for impacted turtles; reference below reporting limits)	Water quality summarized (supplementary) for sites; no sediment/soil analyses	Impacted vs reference sites; adult females; clinical health check; metabolomics normalization (internal standards, biomass, median/log/scale); microbiome QC (read filtering, rarefaction, NSTI filtering)	Internal standards and blank subtraction for metabolomics; replicate DNA extraction (triplicate subsamples); sequencing depth saturation (rarefaction); filtering thresholds (OTU abundance, variance, NSTI)	Significance via fold-change (>2) and p<0.05 (volcano); enrichment/pathway impact; Spearman correlations. Quantitation supported by internal standards for targeted CCM.	Acknowledges other site physico-chemical differences (e.g., salts) could contribute; no formal synergy/antagonism modelling.	Small sample size; sites confidential; potential confounding environmental parameters; host genome not available so nearest turtle genome used for MetOrigin; causality not established.	Available on request; not publicly available due to ongoing PFAS investigation.	Not reported	Yes (MetOrigin uses curated databases such as KEGG/HMDB; PICRUSt2 inference)	Wild Caught samples	Wild Caught samples
	Primary research	Heavy metal concentrations in feathers and metabolomic profiles in Pacific black ducks (Anas superciliosa) from Southeastern Australia	Nzabanita et al. 2025	https://doi.org/10.1093/etojnl/vgae004	This study measures the concentration of metals and the metabolites in an Australian waterbird species, the Pacific Black Duck. No significant correlation was found between the metals (Cr, Cu, Fe, Hg, Mn, Pb and Zn) and the 21 assigned metabolites .	Pacific Black ducks (Anas superciliosa)	Lake Connewarre Game Reserve (38°15' S, 144°29' E), Dowd Morass Wildlife Reserve (38°08' S, 147°13' E), and Macleod Morass Wildlife Reserve (37°54' S, 147°39' E)	44 in total. Site 1 (n=11, all female), site 2 (=14, 6 males and 8 females) and site 3 (n=19, all female).	3	Contaminants determined in wing feathers, metabolites in wing muscle	Untargeted	GC-MS	Metals	No	Age determined	Lipid mixture and amino-acid standard solution CRM used as external standards.	No significant responses.	Metals and correlations between them or synergistic effects not dicussed.	Small sample size. Birds collected from a small geographical area. Sex-bias as not all site had both sexes. Metabolite analysis was semi-quantitative and suggests targeted analyses in future.	Data is available on request.	No		Wild Caught samples	Wild Caught samples
	Book Chapter	Analysis and Interpretation of Metabolite Associations Using Correlations	Saccenti et al. 2023	https://doi.org/10.1007/978-3-031-39094-4_3	Chapter in book covering metabolomics fundamentals, analytical platforms (LC–MS/GC–MS/NMR), targeted vs untargeted workflows, data analysis, and applications including environmental metabolomics.	Not applicable (methods/reference book)	Not applicable	Not applicable	Not applicable	Not applicable	Both (conceptual coverage)	Conceptual coverage of LC–MS, GC–MS, NMR and associated separation and MS platforms (e.g., QqQ, QTOF, Orbitrap)	Not applicable	Not applicable	Not applicable (methods discussion)	Not applicable (general best-practice discussion)	Not applicable	Not applicable	Not applicable	Not applicable	Not assessed (varies by chapter)	Yes (chapter-level citations and literature synthesis)	Wild Caught samples	Wild Caught samples
	Review	Metabolomics as a valid analytical technique in environmental exposure research: application and progress	Wei et al. 2022	https://doi.org/10.1007/s11306-022-01895-7	Comprehensive review of metabolomics applications for assessing biological effects of environmental exposures (radiation, heavy metals, air pollutants including PM2.5, and persistent organic pollutants), summarizing analytical platforms, biomarkers, and mechanistic insights.	Multiple (human, rodent, aquatic and terrestrial organisms; literature review)	Not applicable	Not applicable (review of published studies)	Not applicable	Multiple matrices across studies (serum, plasma, urine, tissues, organs, feces)	Both (review covers targeted and untargeted metabolomics)	NMR; GC–MS; LC–MS; UPLC–QTOF–MS; CE–MS (conceptual and applied examples)	Radiation exposure; heavy metals (Cd, As, Hg, Pb, Cr); air pollutants (PM2.5); POPs (PCBs, dioxins, PFAS incl. PFHxA); PAHs	Not applicable (contextual across reviewed studies)	Exposure type, dose, duration, organism, tissue specificity (as reported in reviewed literature)	Discussed conceptually; references best practices and analytical validation across platforms	Summarizes statistical and biomarker validation approaches from source studies; standards usage varies by study	Yes (review discusses mixed exposures and complex environmental stressor scenarios)	Heterogeneity of study designs; need for targeted validation and mechanistic confirmation; limited causal inference	Not applicable (review article)	Yes (references MSI minimum reporting standards literature)	Yes (systematic literature synthesis)	Wild Caught samples	Wild Caught samples
Caged Field Metabolomics	Primary research	Untargeted Metabolomics Analyses and Contaminant Chemistry of Dreissenid Mussels at the Maumee River Area of Concern in the Great Lakes	Legrand et al. 2023	https://doi.org/10.1021/acs.est.3c00812	This study applied untargeted metabolomics and contaminant chemistry to dreissenid mussels caged for 30 days at four sites along the Maumee River (Great Lakes). Mussel metabolomes, measured by NMR, differed significantly from a Lake Erie reference site, showing alterations in energy metabolism and amino acids. Tissue contaminant profiles varied by location: upstream mussels showed pesticide signa…	Mussles (Dreissena sp.)	Site codes and coordinates reported in Supporting Information (Table S1).	300 - 500 per cage 30 days	4	Whole mussel soft tissue (polar extracts)	Untargeted	NMR	PAHs, PCBs, PBDEs, PPCPs, pesticides, alkylphenols (tissue)	no	Same source population, 30-day caging, handling/timepoint comparisons.	2 mmol sucrose in a 10% D2O sealed standard sample was used as a system suitability test(SST) before the analysis of experimental samples.19 Control materials used to evaluate technical precision included a process blank, an in-house pooled mussel control material (MCM), an NIST standard reference material (SRM 2974a - Organics in freeze-dried mussel tissue), and a technical replicate added to ea…	The findings demonstrate the potential of metabolomics for assessing aquatic ecosystem health and highlight the need to account for mussel metabolic cycles and stressor-specific responses. Distinct metabolomic and contaminant signatures underscore the value of integrating these approaches into biomonitoring programs in the Great Lakes.		Without sediment and water quality data for the present study, it is difficult to distinguish between real-time contaminant exposure, noncontaminant abiotic stressors, and food quality.Additionally, experimental factors such as caging, length ofexposure, and seasonality of mussel metabolism may also obscure upstream and downstream site differences. The present holistic analysis does provide insig…	Yes			Caged Field Metabolomics	Caged Field Metabolomics
	Primary research	Neurotoxicological effects on marine mussel Mytilus galloprovincialis caged at petrochemical contaminated areas (eastern Sicily, Italy): 1H NMR and immunohistochemical assays	Cappello et al. 2015	http://dx.doi.org/10.1016/j.cbpc.2014.12.006	This article investigates the neurotoxicological effects of environmental pollution, mainly related to petrochemical activities(Hg and PAHs), on the marine mussel Mytilus galloprovincialis.	Mussels - Mytilus galloprovincialis	Priolo (37°1201000N; 15°1304400E) and Vendicari (36°4703500N; 15°0805200E)	200 mussels at each site caged for 30 days	2	Gills	Targetted	1H NMR	PAHs and Hg	No		2,2-dimethyl-2-silapentane-5-sulfonate (DSS) Internal Standards used for NMR	Adverse and compromising effects on caged M. galloprovincialis, were previously reported, which included inducing severe morphological damage to the gills, as well as metabolic alteration. Specifically, changes observed in metabolites may indicate disturbances in osmotic regulation, energy metabolism and neurotransmission. Mussels caged at the polluted site showed a significant 42% depletion in s…	The site represented a heavily polluted site but details were not discussed if there were antagonistic or synergistic effects.		Not stated - not readily available	No	Site considered under national interest due to pollution. Pollution concentrations previously reported - Istituto Centrale per la Ricerca scientifica e tecnologica Applicata al Mare (ICRAM), 2005. Valutazione preliminare dei dati della caratterizzazione ambientale della Rada di Augusta – aree prioritarie ai fini della messa in sicurezza di emergenza. Sito di bonifica di interesse nazionale di Pri…	Caged Field Metabolomics	Caged Field Metabolomics
	Primary research	1H NMR-based metabolomics investigation on the eﬀects of petrochemical contamination in posterior adductor muscles of caged mussel Mytilus galloprovincialis	Cappello et al. 2017	http://dx.doi.org/10.1016/j.ecoenv.2017.04.040	This study used 1H NMR-based metabolomics to assess the effects of petrochemical contamination on caged mussels (Mytilus galloprovincialis) in Sicily’s polluted Augusta-Melilli-Priolo area compared to a reference site. After 60 days, posterior adductor muscle tissues showed distinct metabolic alterations revealed by PCA.	Mussels - Mytilus galloprovincialis	Augusta (37°10' 39.201"N, 15°12' 26.286"E) and Brucoli (37°17' 23.67"N, 15°12' 40.68"E).	15 mussles per cage per site for 60 days	2	Posterior adductor muscle (PAM) tissues	Targeted	1H NMR	PAHs and Hg	Sediment and Water samples	Water quality parameters were measured in triplicate	Sexes were not mentioned/separated/ investigated	Pollution was linked to impaired energy metabolism (reduced glucose, glycogen, ATP/ADP), disrupted amino acid metabolism (increased proline, glycine, isoleucine, leucine), and disturbed osmoregulation.		The study primarily focuses on PAHs and Hg, but other pollutants present in the petrochemical area might also contribute to the observed effects.	Not Stated - not readily available	No	Previous papers were cited to include water PAH and Hg Concentrations	Caged Field Metabolomics	Caged Field Metabolomics
	Primary research	Carbonic anhydrase integrated into a multimarker approach for the detection of the stress status induced by pollution exposure in Mytilus galloprovincialis:A field case study	Caricato et al. 2019	ps://doi.org/10.1016/j.scitotenv.2019.06.446	The article examines the sensitivity of the enzyme carbonic anhydrase (CA) in the digestive gland of the mussel Mytilus galloprovincialis as a biomarker for detecting stress induced by chemical pollution exposure. CA induction in the mussel digestive gland is a suitable biomarker to be integrated into a multi-marker approach for detecting and characterizing the stress status induced by pollution …	Mussels - Mytilus galloprovincialis	Augusta (37°10' 39.201"N, 15°12' 26.286"E) and Brucoli (37°17' 23.67"N, 15°12' 40.68"E).	200 mussels at each site caged for 60 days	2	Digestive Glands	Targeted	1H NMR	Hg, Cu, Cr, and Ni (Hg and Cu levels were significantly higher).	Metal contamination was analysed in water/sediment and tissues			Metabolomic analysis revealed changes in amino acids, glycogen, ATP/ADP, and uracil levels, indicating metabolic disturbances in the digestive gland of mussels from the polluted site. The biochemical and cellular responses were integrated with a decrease in the whole-organism Condition Factor, indicating an impaired physiological state of mussels exposed to chemical pollution. CA induction in the…						Caged Field Metabolomics	Caged Field Metabolomics
	Primary research	Metabolomic responses in caged clams, Ruditapes decussatus,exposed to agricultural and urban inputs in a Mediterranean coastal lagoon (Mar Menor, SE Spain)	Campillo et al. 2015	http://dx.doi.org/10.1016/j.scitotenv.2015.03.136	This article presents a metabolomic study of the digestive gland of the clam Ruditapes decussatus transplanted to different sites in the Mar Menor coastal lagoon in Spain.	Clam - Ruditapes decussatus		7 and 22 days of Transplantation	3	Digestive Gand	Targeted	HPLC–MS	Surfactants, PAHs, Triazines, Chlorpyrifos, Propyzamide, Pendimethalin, Flutolanil, Pharmaceuticals	Water analysed - pollutant levels found in El Albujón watercourse and in Mar Menor surface waters, sediment and biota samples from the studied area are briefly summarized.	Metabolomic responses in field studies should be interpreted taking into account environmental parameters such as trophic conditions and the fact that they could present a time-dependent pattern.	The quality of the results was assessed by: (i) checking the extractionmethodwith standard mixtures; (ii) the use ofan internal standard (IS); and (iii) quality control samples (QC).	After 7 days of transplantation, clams at the polluted site showed significantly higher levels of several amino acids, osmotic protectants, and nucleotides compared to the control site. This was likely due to disturbances in osmoregulation and energy metabolism caused by exposure to agricultural and urban pollutants. After 22 days, the metabolite levels in clams were drastically reduced, even low…	Yes the presence of multiple stressors were acknowledged.		Not Stated - not readily available	No	Pollutant levels found in El Albujón watercourse and in Mar Menor surface waters, sediment and biota samples from the studied area are briefly summarized.	Caged Field Metabolomics	Caged Field Metabolomics
	Primary research	1 H-NMR metabolomics profiling of zebra mussel (Dreissena polymorpha): A field-scale monitoring tool in ecotoxicological studies	Hani et al. 2021	https://doi.org/10.1016/j.envpol.2020.116048	This study assessed the health of zebra mussels (Dreissena polymorpha) using 1H-NMR metabolomics and classical energy biomarkers during two months of caging upstream and downstream of wastewater treatment plants in the Meuse River (France and Belgium).	zebra mussel (Dreissena polymorpha)	yes - 1Charleville-M_x0003_ezi_x0003_eres upstream (CM-Upstream), 2- CharlevilleM_x0001_ezi_x0003_eres downstream (CM-Downstream), 3- Charleroi upstream (Cr-Upstream), 4- Charleroi downstream (Cr-Downstream), 5Namur upstream1 (Nam-Upstream1), 6- Namur upstream2 (NamUpstream2) and 7- Namur downstream (Nam-Downstream).	200 per cage	7	Whole tissue	Targeted	1H NMR	Listed and described in supplimentary material	Water			Metabolomics identified 28 metabolites, with lactate, glycine, maltose, and glutamate driving differences between sites, suggesting impacts on osmoregulation and anaerobic metabolism. Of eight energy biomarkers measured, five (LDH, ACP, lipase, total reserves, ETS) showed significant alterations, though without a consistent site pattern.The findings highlight 1H-NMR metabolomics as a powerful com…				No		Caged Field Metabolomics	Caged Field Metabolomics
	Primary research	UntargetedMetabolomicsAnalysesandContaminantChemistryof DreissenidMusselsattheMaumeeRiverAreaofConcerninthe GreatLakes	Legrand et al. 2023	https://doi.org/10.1021/acs.est.3c00812	Field-based biomonitoring study using NMR-based untargeted metabolomics and comprehensive tissue chemistry to assess ecosystem health in dreissenid mussels caged along the Maumee River and a Lake Erie reference site.	Dreissena sp. (dreissenid mussels; primarily D. polymorpha)	Reported descriptively (Maumee River sites and Lake Erie reference; exact coordinates in Supplementary)	Metabolomics: ~20–24 mussels per site; Chemistry: 200–400 mussels per site	4 (3 river sites + 1 Lake Erie reference)	Whole soft tissue (metabolomics and contaminant chemistry)	Untargeted metabolomics; targeted chemical contaminant analyses	1H NMR spectroscopy (700 MHz); spectral binning and multivariate analysis (PCA, PLS-DA); pathway analysis via MetaboAnalyst	PAHs, PCBs, PBDEs, pesticides (e.g., atrazine, metolachlor), PPCPs, alkylphenols	Not directly analysed; interpretation supported by historical and parallel monitoring data	Site, caging duration (30 days), handling method (caged vs in situ), sampling time; normalization and scaling applied	Process blanks; pooled mussel control material; NIST SRM 2974a; technical replicates; system suitability tests	Significance via VIP scores (>1.5), PCA/PLS-DA validation, permutation testing; NIST SRM used for QC	Yes (multiple contaminant classes and abiotic stressors discussed, though not formally modelled)	Whole-body metabolome may mask tissue-specific effects; seasonality and handling effects; lack of concurrent water chemistry	Metabolomics data deposited in MetaboLights (MTBLS6311)	Yes (minimum reporting standards and MQACC recommendations referenced)	Yes (external chemistry laboratories; historical Mussel Watch data)	Caged Field Metabolomics	Caged Field Metabolomics
	Primary research	Active biomonitoring using mussels: an evaluation of the untargeted metabolomics and proteomics responses as biomarkers of stream ecosystem health	Nugroho et al. 2025	https://doi.org/10.1007/s11356-025-36771-z	This study evaluated Sinanodonta woodiana mussels as bioindicators of pollution in the Code Stream, Yogyakarta, using an active biomonitoring approach at three sites with differing pollution levels. Untargeted metabolomics and proteomics were performed on gill and digestive gland tissues.	Mussel - Sinanodonta woodiana	S1 is situated in the upstream part of the Code Stream 7°38ʹ19.5ʹʹS 110°24ʹ11.5ʹʹE. S2 is situated in central Code Stream in Yogyakarta City 7°47ʹ19.2ʹʹS 110°22ʹ06.6ʹʹE. S3 is located downstream of the Code Stream 7°53ʹ34.2ʹʹS 110°23ʹ06.3ʹʹE.	18 mussles per site caged for 28 days	3	gills and digestive glands pooled from each site.	Untargeted	LC-HRMS Orbitrap		No		Control Unexposed Group. Methanol blank used for metabolite analysis.	No Standards were used. Metabolomics analysis identified putative metabolites potentially involved in amino acid, nucleotide, and antioxidant metabolism pathways, indicating adaptive responses to pollutant exposure.Metabolomics revealed significant shifts in amino acid, nucleotide, and antioxidant pathways, identifying several candidate metabolites (e.g., 7-oxocholesterol, 18-HEPE) as biomarkers …	Nothing mentioned other then 'Pollutants" - no detail what the pollutants may be.	No limitations expressed.		No	Previously published data reported Copper and Micro plastics in the Code Stream.	Caged Field Metabolomics	Caged Field Metabolomics
	Primary research	Investigating metabolomic alterations in caged Sinanodonta woodiana exposed to stream pollution	Rivaldi et al. 2025	https://doi.org/10.1016/j.etap.2025.104741	This study investigated metabolomic and enzymatic responses of Sinanodonta woodiana to pollution in Indonesia’s Winongo stream. Mussels were transplanted for 28 days to sites with differing pollution levels, and metabolite profiles, antioxidant enzymes (SOD, CAT), and metallothionein (MT) were measured in gills, mantle, and digestive glands.	Mussel - Sinanodonta woodiana	S1 -Sleman (7◦38’38.0” S, 110◦23’33.6” E). S2- Yogyakarta City (7◦48’28.9” S, 110◦21’13.5” E). S3 - Bantul Regency (7◦52’3.3” S, 110◦20’51.0” E).	18 Mussles per site. Three were collected on days 0, 3, 7, 14, 21 and 28	3	Mussel gills, mantles, and digestive glands	Targeted	HPLC		No		Control: unexpossed mussles. Other QAQC measures not listed.	Pollution caused major metabolic shifts, disrupting amino acid and energy pathways, while enzyme and MT responses peaked around day 14 at the most polluted site. Key metabolites (alanine, glutamate, aspartate, phenylalanine) emerged as candidate biomarkers.The findings support S. woodiana as a bioindicator and demonstrate the value of combining metabolomics with enzymatic biomarkers and multi-tis…		Not Stated	Not Stated - not readily available	No		Caged Field Metabolomics	Caged Field Metabolomics
	Primary research	Metabolomics for biomonitoring: an evaluation of the metabolome as an indicator of aquatic ecosystem health	Pomfret et al., 2020	https://doi.org/10.1139/er-2019-0003	Environmental metabolomics bridges the gap between traditional biomarkers and community-level indicators by capturing stress‑related shifts in organismal metabolism that reflect ecological function and fitness. The abstract argues that metabolomes meet most bioindicator criteria and, with further development, can be integrated into existing aquatic biomonitoring programs to provide earlier warnin…	Not applicable	Not applicable	Not applicable	Not applicable	Not applicable			Not applicable	Not applicable	Not applicable	Not applicable	Not applicable	Not applicable	Not applicable	Not applicable	Not applicable	Not applicable	Caged Field Metabolomics	Caged Field Metabolomics
	Book Chapter	NMR-based metabolomics of dragonfly nymphs exposed to multiple stressors: An approach for field assessments to diagnose effects☆	Brua et al. 2022	https://doi.org/10.1016/B978-0-12-816460-0.00002-2	Book chapter case study combining in situ caging/transplant bioassay and 1H-NMR metabolomics to assess whether boreal snaketail dragonfly nymph metabolomes differ among reference sites and sites exposed to natural bitumen, municipal sewage effluent, and oil sands mining activity in the Lower Athabasca River (Alberta, Canada).	Ophiogomphus colubrinus (boreal snaketail dragonfly nymph)	M0 54°43.590000′N, 113°18.036000′W; M1A 56°37.314000′N, 111°39.324000′W; M3 56°47.628000′N, 111°24.252000′W; M4 57°05.880000′N, 111°33.894000′W	2 nymphs per cage; 8 rock-baskets per site (n=16 nymphs per site; 64 total). After exposure: 2 deaths + 3 escapes; 59 individuals used for metabolomics; whole organism = 1 replicate.	4 (M0 reference outside bitumen; M1A reference inside bitumen; M3 bitumen+municipal sewage effluent; M4 bitumen+municipal sewage effluent+oil sands mining)	Whole-body (single whole nymph per sample; polar extract).	Untargeted (NMR spectral profiling; binning).	Polar metabolite extraction (Bligh–Dyer methanol:chloroform:water 2:2:1.8) from 10 mg dry mass; 1H NMR on Bruker Avance 600 MHz; 0.005 ppm binning; PCA and PLS-DA in MATLAB/PLS_Toolbox.	Multiple stressors: natural bitumen exposure; municipal sewage effluent; oil sands mining activity. Supporting chemistry measured: water nutrients/ions/trace metals/TSS; sediment metals and alkylated/parent PAHs.	Yes – water chemistry (ions, nutrients, metals, TSS) and sediment metals + PAHs measured at day 1 and day 7.	Exposure category; time-of-day standardized for collection (1300–1645 h); physico-chemical variables (temp, DO, pH, conductance etc.) recorded; reference sites combined after no metabolome difference; outlier removal.	Internal reference TMSP; removal of residual water peak bins; autoscaling; cross-validation for component selection; outliers removed using Q residuals/Hotelling T2.	No significant metabolome differences among sites (PCA/PLS-DA showed poor classification: only ~8% variance in class variables). Standard used: TMSP for normalization/chemical shift referencing.	Yes – field multiple-stressor gradient (bitumen ± sewage effluent ± oil sands mining); no evidence of synergistic/antagonistic metabolic effects detected in 7-day exposure.	Likely low contaminant concentrations and/or short (7-day) exposure; sex/age unknown; peak overlap in 1D NMR; recommends longer exposure (up to 6 weeks), temporal sampling, alternative organisms (filter feeders), and/or LC–MS for higher sensitivity and lipid resolution.	Not stated (book chapter; no repository noted).	Not reported	Yes – supporting water/sediment chemistry performed by multiple Environment and Climate Change Canada labs; contextual data from other monitoring reports.	Caged Field Metabolomics	Caged Field Metabolomics
	Primary research	Developing metabolomics-based bioassessment: crayfish metabolome sensitivity to food and dissolved oxygen stress	Izral et al. 2018	https://doi.org/10.1007/s11356-018-3518-5	Reciprocal transfer field experiment testing whether metabolomes of crayfish tissues can detect and differentiate reference vs agricultural vs municipal wastewater impacts across streams; evaluates tissue-specific response rates over 1–2 week exposures.	Faxonius virilis (northern crayfish) – adult females only	Reference (Brokenhead River): 49.925884°N, -96.38316°W; Agriculture (Shannon Creek): 49.278703°N, -98.024131°W; Wastewater (Deadhorse Creek): 49.222439°N, -97.865869°W	Collected n=53 crayfish/site; Week 0 baseline: 5 crayfish/site dissected; Transfer experiment: 48 crayfish assigned across treatments (3 groups of 16: remain/recovery/impact) and sampled at Week 1 or Week 2; per-treatment n typically ~5–8.	3 (reference, agriculture, wastewater)	Hepatopancreas, gill, and tail muscle (polar metabolites).	Untargeted (1H NMR spectral profiling with post hoc metabolite annotation).	Dual-phase extraction methanol:chloroform:water (2:2:1.8); lyophilize; resuspend in phosphate buffer with TMSP; 1H NMR (Bruker Avance 600 MHz, 128 scans, excitation sculpting); 0.005 ppm binning; PCA + GLMs; ANOVA with FDR; Chenomx annotation.	Water quality stressors (nutrients, TSS, dissolved oxygen/temperature time series) and PPCPs (58 analytes by LC–MS/MS; 15 detected, dominated at wastewater site during lagoon discharge).	Water sampled (nutrients/TSS at multiple times; PPCPs once; DO/temperature logged); sediment/soil not reported.	Adult female only; size range 55–80 mm; randomized assignment; no supplementary diet; exposure duration (1 vs 2 weeks); outlier removal using Hotelling T2; separate analyses by tissue and week.	Randomized prep/run order; TMSP internal standard; removal of residual water peak; normalization and autoscaling; planned hypotheses; FDR correction for ANOVA; avoided PLS-DA to reduce overfitting.	GLMs assessed at α=0.10; significant bins via ANOVA with FDR p<0.05; metabolite IDs via Chenomx and published chemical shifts. Standard used: TMSP.	Multi-stressor field context (agriculture non-point + wastewater point-source; associated hypoxia/ammonia/PPCPs). Differentiation between stressor types demonstrated; synergy/antagonism not explicitly modelled.	Tissue-dependent sensitivity and response time; hepatopancreas showed limited/inconsistent discrimination; recommends tissue choice based on monitoring purpose and further testing across regions/stressors and longer exposures.	Supplementary data available with the article (via journal DOI).	Not reported	Yes – PPCP analyses performed by external laboratory (AXYS Analytical Services).	Caged Field Metabolomics	Caged Field Metabolomics
	Primary research	Crayfish tissue metabolomes effectively distinguish impacts of wastewater and agriculture in aquatic ecosystems	Izral et al. 2021	https://doi.org/10.1016/j.scitotenv.2020.143322	Laboratory-based exposure study evaluating how food limitation and dissolved oxygen stress alter the crayfish metabolome, with the aim of developing metabolomics-based bioassessment tools and identifying tissue-specific sensitivity to common environmental stressors.	Faxonius virilis (northern crayfish)	Not applicable – controlled laboratory experiment	Adult crayfish exposed to factorial treatments of food availability and dissolved oxygen; replicate numbers varied by tissue and treatment (reported in study tables).	Laboratory experiment (no field sites)	Gill, hepatopancreas, and tail muscle tissues	Untargeted	1H NMR-based metabolomics with polar metabolite extraction (methanol:chloroform:water); spectral binning; PCA and univariate statistics to assess metabolic responses to stressors.	Food limitation (starvation) and dissolved oxygen stress (hypoxia) – no chemical contaminants	Water dissolved oxygen monitored and controlled; sediment/soil not applicable	Controlled laboratory conditions; adult crayfish; factorial manipulation of food availability and dissolved oxygen; tissue-specific analyses	Internal standard (TMSP); randomized sample processing; normalization and autoscaling; outlier screening	Significant metabolomic shifts detected in response to hypoxia and food stress, particularly in gill tissue; TMSP used as chemical shift and normalization standard	Yes – combined food and dissolved oxygen stress examined, demonstrating interactive metabolic effects under controlled conditions	Laboratory setting limits direct ecological realism; responses may differ under complex field conditions; recommends validation in field-based biomonitoring studies	Not explicitly stated; data available upon request or within supplementary materials	Not reported	No	Caged Field Metabolomics	Caged Field Metabolomics
	Primary research	Linking field-based metabolomics and chemical analyses to prioritize contaminants of emerging concern in the Great Lakes basin	Davis et al. 2016	https://doi.org/10.1002/etc.3409	This study applied field-based metabolomics and chemical analyses to prioritize contaminants of emerging concern in the Great Lakes Basin. Caged fathead minnows were deployed at 18 sites, with liver metabolites profiled by 1H NMR spectroscopy and compared against contaminant concentrations and temperature using partial least-squares regression.	Fathead minnow Pimephales promelas	No coordinates - 5 watersheds: St. Louis River estuary [MN, USA], Detroit River [MI, USA], Maumee River [OH, USA], Milwaukee River estuary [WI, USA], and Fox River [WI, USA]	Two cages with 12 FHMs per cage (6 male, 6 Female) deployed at 18 sites for 4 days	18	Livers	Targeted	1H NMR	132 unique organic compounds were measured in water samples collected from the Great Lakes basin. These contaminants included pesticides, industrial and domestic contaminants, and a suite of pharmaceuticals and personal care products. Of the 132 contaminants analyzed, 86 were detected in at least one of the water samples	Water			N,N-diethyl-m-toluamide (DEET); Benzophenone β-Sitosterol; 3,4-Dichlorophenyl isocyanate; Camphor; Cotinine; Diethyl phthalate; Metolachlor; Bisphenol A; and Caffeine These contaminants were among those with the strongest relationships to endogenous metabolite shifts, as indicated by their Q²Y values in the partial least-squares regression models for male and female fish. It's important to note t…	Temperature mentioned as a potential additional stressor	Assessments of the biological importance of contaminants were restricted to those contaminants affecting liver processes - other tissues or species may respond differently. Care also must be taken in generalizing specific results to other regions because contaminants identified as not having a biological impact at our sites may reach biologically relevant levels elsewhere. depth-integrated grab w…	Data is available on request.	No		Caged Field Metabolomics	Caged Field Metabolomics
	Primary research	Evaluation of targeted and untargeted effects-based monitoring tools to assess impacts of contaminants of emerging concern on fish in the South Platte River, CO	Ekman et al. 2018	https://doi.org/10.1016/j.envpol.2018.04.054	This article evaluates the use of targeted and untargeted effects-based monitoring tools to assess the impacts of contaminants of emerging concern on fish in the South Platte River, Colorado.	Fathead minnow Pimephales promelas	No - wastewater treatment plants (W1 and W2) on the South Platte River in CO (USA).	sexually-mature (6-8 month-old) male fathead minnows (Pimephales promelas) deployed for 5 days. 15 fish per cage, one cage per site	5	Liver	Untageted and targeted	1H NMR	Up to 102 contaminants measured - Estrone - strong covariance between estrone concentrations and the metabolomics responses in the fish. Pesticides -strong covariance between the metabolomics responses and the concentrations of certain pesticides like thiabendazole, malathion, and 1,4-dichlorobenzene.	Water	development and application of untargeted tools (such as metabolomics) is also critical given the complexity of anthropogenic mixtures and the variety of effects they may produce.		Metabolomics analysis revealed that the hepatic metabolome of fish exposed to effluents from the W2 WWTP showed changes consistent with estrogenic impacts, such as elevated alanine and glutamate levels. The untargeted metabolomics approach also detected non-estrogenic impacts, such as increased glutathione levels, suggesting oxidative stress in fish exposed to the W2-S effluent.			Not Stated - not readily available	No		Caged Field Metabolomics	Caged Field Metabolomics
	Primary research	Time-dependent biological responses of juvenile yellow perch (Perca flavescens) exposed in situ to a major urban effluent	Defo et al. 2021	https://doi.org/10.1016/j.ecoenv.2021.112483	Time-dependent biological responses of juvenile yellow perch (Perca flavescens) exposed in situ to a major urban wastewater treatment plant (WWTP) effluent in the St. Lawrence River, Canada.	Juvenile yellow perch (Perca flavescens)	Three enclosures were installed at Canards Island (reference site; 45◦42’0.7’’N and 73◦27’50.6’’O) and three cages at Robinet Island (45◦44’29.1’’N and 73◦25’38.6’’O)	37-40 perch were placed at two sites. Fish were caged at each site for one, three, and six weeks	2	Liver	Targeted	1H NMR	Metal and halogenated flame retardant concentrations,		The authors note that a larger sample size would be required to statistically confirm the apparent separation in the liver metabolome between effluent-exposed and reference fish at week 6.		Liver metabolomic profiles differed between caged and laboratory-reared perch, indicating a caging effect, but were similar between effluent-exposed and reference fish. Gill oxidative stress biomarkers were not affected by effluent exposure, suggesting perch may have developed adaptive strategies. Concentrations of polybrominated diphenyl ethers (PBDEs) and some metals were higher in tissues of p…		The results indicated that the caging itself had an effect on the fish, as evidenced by differences in the liver metabolome and lower body condition of caged fish compared to laboratory-reared fish.The exposure duration of 6 weeks may have been too short to observe significant differences in the liver metabolome between effluent-exposed and reference fish, despite differences in tissue contaminan…				Caged Field Metabolomics	Caged Field Metabolomics
Lab reared organisms exposed to field samples (mesocosms)	Primary research	Assessing the response of an urban stream ecosystem to salinization under different flow regimes	Pimentel et al. 2024	https://doi.org/10.1016/j.scitotenv.2024.171849	Streamside ExStream mesocosm experiment in an urban restored stream applying salinity pulses along a NaCl gradient and normal vs reduced flow velocity; assesses responses across multiple organism groups (macroinvertebrates, algae, fungi, parasites) and ecosystem functions (decomposition, respiration, primary production).	Multiple taxa: macroinvertebrates, eukaryotic algae, aquatic fungi, parasites (incl. microsporidia in amphipods)	Boye River, Germany: 51.5533°N, 6.9485°E (ExStream site)	64 mesocosms; 8 salinity levels × 2 flow levels (16 treatments) with 4 replicates each; ~22 d acclimation + 14 d stressor phase; multiple sample types (benthic/leaf-bag/drift/biofilm/leaves/cotton)	1 (single urban stream field site)	Not serum; benthic and leaf-bag macroinvertebrate samples, drift samples, biofilm scrapings, leaf discs and leaf packs, cotton strips (plus fungal conidia suspensions)	Not applicable	Not applicable (uses metabarcoding + functional assays; not metabolomics)	Stressors: salinity pulses (NaCl; daily ~9 h pulses across a conductivity gradient) and reduced flow velocity (20 vs 10 cm/s); legacy salt pollution noted as context	Yes—conductivity monitored twice daily; water samples for chloride calibration; sediment traps used; (no soil)	Flow velocity treatment; salinity as continuous predictor (median conductivity); discharge calibration; pulsed vs overnight-off dosing; multi-trophic and functional endpoints; extensive bioinformatic workflows	Metabarcoding controls: extraction duplicates, negative controls, replicate merging rules, read subtraction using negatives; functional assay protocols standardized; model diagnostics described	Key significant responses: reduced flow altered most communities and reduced decomposition/respiration; salinity mainly increased macroinvertebrate drift and reduced fungal sporulation; interactions rare (one antagonism in fungal sporulation; one weak/trending synergism for Baetidae drift on additive scale)	Yes—explicit multiple-stressor context (salinity × flow), evaluated for non-additive effects; interactions detected were rare	Limitations: potential stressor legacy/adaptation from historic mining salt; pulsed (not continuous) salinity; dosing deviations and tube blockages; short stressor duration may underestimate chronic effects	Raw datasets and outputs deposited to OSF (doi:10.17605/OSF.IO/247JC)	Not applicable	Yes (uses third-party reference databases: BOLD, GenBank, PR2; sequencing via external provider; OSF repository)	Lab reared organisms exposed to field samples (mesocosms)	Lab reared organisms exposed to field samples (mesocosms)
	Methods / technical article	An automated modular heating solution for experimental flow-through stream mesocosm systems	Pimentel et al. 2024	https://doi.org/10.1002/lom3.10596	Methods paper describing a modular automated heating + mixing module for open flow-through stream mesocosms (ExStream), validated in lab and field; includes drift-mortality tests for invertebrates passing through warm-water mixing to recommend safe warm-water supply temperatures.	Gammarus sp. (drift-mortality tests); stream mesocosm communities (general)	Field validation at Boye River (ExStream): 51.5533, 6.9485; Gammarus sampling site: 51.5574, 6.9365 (decimal degrees)	ExStream: 64 mesocosms (4 temp levels × 16 replicates). Drift-mortality: 250 gammarids tested in groups of 10; outcomes reported per warm-water treatment.	1 field site (+ laboratory trials)	Not applicable (engineering study; mortality of drifting invertebrates assessed)	Not applicable	Not applicable (temperature-control / engineering methods; no metabolomics)	Thermal stress (warming via mixed warm water); tests warm-water supply temperatures (45/55/65°C) and resulting mortality; validates achieved ΔT in mesocosms	Water temperature controlled and logged; filtration/settling addressed due to sediment load (no soil)	Target temperature increases (+2/+4/+6°C), hysteresis settings, warm-water supply temperature, flow rates, filtration constraints; modeling temperature time-series	Temperature loggers; GAMM modeling with AR(1); equivalence tests with ROPE; calibration/checks described; drift mortality analyzed with Fisher’s exact tests	Gammarus mortality significantly increased with warm-water ≥55°C; no increased mortality at ~45°C; recommends max warm-water ≤45°C if organisms drift through mixer	Explicitly intended for multi-stressor field experiments; notes warming can amplify contaminant effects and supports realistic multiple-stressor testing in flow-through systems	Operational constraints include filtration clogging under high sediment loads and disruptions from flood events; recommends filtration/settling improvements and stream selection to reduce clogging	Data + analysis scripts available in supplementary materials	Not applicable	Yes (cites/uses prior ExStream studies; field metadata; R packages)	Lab reared organisms exposed to field samples (mesocosms)	Lab reared organisms exposed to field samples (mesocosms)
	Primary research	Multiple-stressor effects on stream macroinvertebrate communities: A mesocosm experiment manipulating salinity, fine sediment and flow velocity	Beermann et al. 2018	https://doi.org/10.1016/j.scitotenv.2017.08.084	Outdoor ExStream mesocosm experiment testing single and interactive effects of increased salinity (chloride), fine sediment deposition, and reduced flow velocity on stream macroinvertebrate communities across microhabitats (substratum, leaf litter, drift).	Stream macroinvertebrate community (EPT taxa, Chironomidae, Gammarus, etc.)	Felderbach, Germany: 51°20′59.09″N, 7°10′14.03″E (136 m a.s.l.)	64 mesocosms; 2×2×2 full-factorial with 8 replicates per treatment; 3 compartments (substratum, litter bag, drift).	1 (single stream water supply to mesocosms)	Not applicable (macroinvertebrate community sampled from substratum, litter bags, and drift nets)	Not applicable	Not applicable (community ecology; no metabolomics)	Stressors: increased salinity (NaCl; ~+1000 µS/cm; ~312 mg/L chloride), added fine sediment (coverage ~81.8%), reduced flow velocity (16.5 to 9.6 cm/s)	Water chemistry (conductivity/chloride baseline and treatment); sediment cover quantified; no soil	Controlled colonization (24 d) then manipulation (22 d); constant flow rate (2 L/min); randomized block design; compartment-specific sampling; drift propensity computed	Daily flow calibration; randomized block assignment; consistent sampling protocols across compartments; (metabolomics QC not applicable)	Significant effects assessed via ANOVA/MANOVA; many main effects plus 2-way and 3-way interactions (notably 3-way interaction affecting EPT richness)	Yes—multiple stressors; interactions included additive, synergistic, and antagonistic effects; highlights unpredictability and importance of higher-order interactions	Limitations include small mesocosm scale and short duration; taxonomic resolution often family/genus; seasonality and long-term/transgenerational effects not captured	Supplementary data available via journal DOI	Not applicable	Yes (uses external monitoring data sources for site context; literature and threshold comparisons)	Lab reared organisms exposed to field samples (mesocosms)	Lab reared organisms exposed to field samples (mesocosms)
	Primary research	Functional and compositional responses of stream microphytobenthic communities to multiple stressors increase and release in a mesocosm experiment	Mayombo et al. 2024	https://doi.org/10.1016/j.scitotenv.2024.173670	Highly replicated ExStream streamside mesocosm experiment testing effects of reduced flow velocity, increased salinity and increased temperature on microphytobenthos (diatoms and broader microalgae) during stressor application and subsequent recovery, including priority effects after biofilm removal.	Microphytobenthos/periphyton (diatoms; eukaryotic microalgae assemblages)	Boye River, Germany: 51.5533°N, 6.9485°E	Full factorial 2×2×2 with nominal 8 replicates per treatment (64 mesocosms), with minor replicate imbalance due to assignment error; sampling at end of stressor phase (32 channels) and recovery phase (32 channels) plus scraped-area recolonisation samples	1 (single stream/ExStream system; 4 spatial blocks)	Biofilm scraped from mesocosm walls (for digital microscopy, chlorophyll fluorescence and 18S-V9 amplicon sequencing)	Not applicable for metabolomics; community profiling via microscopy and amplicon sequencing (untargeted community assessment)	Not applicable (no metabolomics). Methods include MINI-PAM II chlorophyll fluorescence (F0, Fv/Fm), ethanol chlorophyll extraction with plate reader, digital microscopy (≥400 valves), and 18S-V9 amplicon sequencing with bioinformatic pipeline (natrix2, swarm, PR2, MUMU/LULU-like curation) and multivariate stats (PERMANOVA/NMDS).	Stressors: reduced flow velocity, increased salinity (NaCl dosing; conductivity proxy), increased temperature (~+4°C target, achieved ~+3.45°C); also stressor release/recovery	Water parameters monitored (temperature loggers; conductivity measured daily; background river chemistry measured biweekly); no soil	Stressor phase vs recovery phase; flow jet removal to reduce velocity; salinity dosing via drippers; temperature block-wise treatment; control for phase effects and priority effects (scraped vs non-scraped areas)	Sequencing replicates merged; negative controls subtracted; Hellinger transformation; dispersion tests (betadisper) before PERMANOVA; multiple-comparison correction (Benjamini-Hochberg)	ANOVA/linear models for diversity indices and fluorescence; PERMANOVA for community composition; significant effects mainly from flow velocity and temperature; salinity showed limited effects; no metabolomics standards applicable	Yes—multi-stressor 2×2×2 design; limited interactions detected (notably one temperature×flow interaction in recovery for microalgae OTUs)	Stressor implementation interruptions (pump failure, rainfall/sediment load) reduced effective stressor days; salinity intensity lower than planned; study conducted in spring (cool temps) which may dampen warming effects; recovery time may be insufficient to reach climax community	Datasets and R scripts available on GitHub repository (exstream2022)	Not applicable	Yes (PR2 database; external sequencing service; prior protocols and pipelines referenced)	Lab reared organisms exposed to field samples (mesocosms)	Lab reared organisms exposed to field samples (mesocosms)
	Primary research	Nutrient and moisture limitations reveal keystone metabolites linking rhizosphere metabolomes and microbiomes	Baker et al. 2024	https://doi.org/10.1073/pnas.2303439121	The study investigated the relationship between abiotic stress (nutrient (N and P) limited and replete and moisture limited) soil conditions and rhizosphere microbial communities and metabolites.	soil microbial communities	Greenhouse mesocosm study used soil from Dust Bowl fields in Anadarko Oklahoma USA, study carried out at UC Berkeley USA	30 mesocosms with soil from A, B and C horizons, 5 treatments - control (no nutrient amendment), + N, +P, +NP, and -W (water limited). Sow release urea and rock phosphate added to A horizon of the appropriate treatments. Mesocosms watered with either 50 or 100% mean monthly rainfallat the fieldsite in Oklahoma. Alamo switchgrass was added to each mesocosm to provide roots for rhizosphere. Experim…	N/A	rhizosphere soil	Untargeted	LC-MSMS with Q exactive Orbitrap MS	No analysis of nutrients			not stated but metabolites identified using authentic standards and cited MSI for metabolite identification	Key metabolites of interest were hlorogenic acid, cinnamic acid, glucuronic acid, serotonin, ectoine and acetylcholine. Overview of results: Nutrient addition resulted in increased abundance of organic acids, pentoses and pentose alcohols, sugars, amino acids, nucleosides and miscellaneous compounds such as serotonin and allantoin. Water limitation resulted in increase in fewer metabolites.	interaction between metabolites, particularly serotonin, and abiotic stressors with microbial communities		Yes, raw metabolmics data deposited to Global Natural Products Social Molecular Networking (https://gnps.ucsd.edu) data repository	yes		Lab reared organisms exposed to field samples (mesocosms)	Lab reared organisms exposed to field samples (mesocosms)
	Primary research	Interactive effects of aquatic nitrogen and plant biomass on nitrous oxide emission from constructed wetlands	Cai et al. 2022	https://doi.org/10.1016/j.envres.2022.113716	This study assessed the impacts of 2 different aquatic nitrogen forms - ammonia and nitrate in wastewater from constructed wetlands on plants. Results showed that ammonia resulted in changes to citric acid cycle and glycine, serine, threonine metabolism which meant increased nitrogen uptake and lower N2O emissions.	Plant Acorus calanus L.	none, exposure carried out in a greenhouse at Jinan University Guangzhou, China	6 mesocosms used - 3 for wetland water with ammonia influent and 3 for wetland water with nitrate influent. 6 healthy A. calanus rhizomes were planted in each mesocosm. exposure was 120 days in mesocosm, then plants removed and transferred into reactors with ammonia or nitrate added for additional 15 days.	1	roots	untargeted	GC-MS	ammonia and nitrate	water	temperature, light intensity, humidity	internal standard of which are details not provided, PBQC	Concentrations of 18 metabolites, including glutaric acid, glutamine, citric acid, D gluconic acid, palmitic acid and stearic acid were higher in roots of plants sultured in ammonia compared to nitrate. Oxalate acid, propanedioic acid, galactraic acid and shikimic acid were higher in plants grown in nitrate water.Significant up-regulation in 5 pathways - alanine, aspartate and glutamate (ASG) met…	not assessed		not stated	no		Lab reared organisms exposed to field samples (mesocosms)	Lab reared organisms exposed to field samples (mesocosms)
	Primary research	Detecting copper toxicity in sediments: from the subindividual level to the population level	Jeppe et al. 2017	https://doi: 10.1111/1365-2664.12840	Metabolomics was a more sensitive tool than traditional ecotoxicology assessments to demonstrate adverse effects of copper to macroinvertebrates using field-based microcosms	Chironomus tepperi (non-biting midge)	No coordinates but microcosm experiment carried out at a reference field site in Victoria, Australia	6 treatments (including control), 5 replicate microcosms per treatment. Exposure lasted for 7 weeks		whole organism	targeted (Amines)	LC-MS	Copper	Sediment and water samples		Standards used to determine MRMs to authenticate metabolite IDs	Handful of amine-containing metabolites associated with cysteine metabolism changed with copper exposure, notably homocysteine, lanthionine, gamma glutamylcysteine and glycine. 18 other amine-containing metabolites also significantly changed: asparagine, proline, dihydroxyproline, norepniephrine and kynurenine (increased with increasing copper), Citrulline decreased with increasing copper			yes - data uploaded to Dryad Digital Repository	no		Lab reared organisms exposed to field samples (mesocosms)	Lab reared organisms exposed to field samples (mesocosms)
	Primary research	Mesocosm System to Evaluate BF-MBR Efficacy in Mitigating Oily Wastewater Discharges: an Integrated Study on Mytilus galloprovincialis	Gornati et al. 2019	https://doi.org/10.1007/s10126-019-09923-9	The study investigated the effects of BioFilm Membrane Reactor (BF-MBR) to reduce the impacts of oily wastewater discharges on mussels. Used mRNA expressions, metabolomics and immunohistochemistry to assess the effects on mussel tissues	Mytilus galloprovincialis (Mussels)	No coordinates but exposures carried out in IAMC-CNR Messina Italy	3 mesocosmstreatments - 1 contains seawater only, 1 commercial diesel and dispersant and 1 commercial diesel and dispersant pre-treated through BF-MBR. 300 adult mussels placed in each mesocosm for 2 weeks. 27 adults per mesocosm randomly selected for metabolomics analysis	N/A	gills and digestive gland	untargeted	1H NMR	COD measured to assess total organic compounds	water		DSS as internal standard, spectra were phased, baseline-corrected and calibrated (DSS at 0.0 ppm). Peaks assigned to known chemical shifts and peak multiplicities and byusing Chenomx 500-MHz library database	Differences in metabolites between treatments and tissues. Gills (compared to control): sig increase in amino acids in both treatments (Isoleucine, Leucine, Valine, Alanine), energy metabolites (acetoacetate, glucose,ATP/ADP), osmolytes (hypotaurine, betaine, taurine, TMAO) neurotransmitters (acetyl choline (increase in oil+dispersant, decrease in BF-MBR) and serotonin (Decrease in both treatment…			not stated but provided data in the article	no		Lab reared organisms exposed to field samples (mesocosms)	Lab reared organisms exposed to field samples (mesocosms)
	Primary research	A multi-platform metabolomics approach to identify possible biomarkers for human faecal contamination in Greenshell™ mussels (Perna canaliculus)	Gyawali et al. 2021	https://doi.org/10.1016/j.scitotenv.2021.145363	Multi-platform (GC–MS + LC–MS) metabolomics to characterise tissue-specific responses of Greenshell™ mussels exposed to municipal sewage vs clarified human faeces, aiming to identify low-cost in situ biomarker candidates for human faecal contamination in growing areas.	Perna canaliculus (New Zealand Greenshell™ mussel)	Not reported (seawater and sewage collected in New Zealand; experimental work at ESR laboratory)	15 mussels per tank; 10 mussels/tank processed for metabolomics (3 tissues each; total n=90 tissue samples across 3 treatments); remaining digestive glands (5/treatment) used for norovirus testing	Laboratory exposure (3 tanks; no field sites)	Gill, haemolymph, digestive gland	Both: GC–MS (broad profiling) + LC–MS central carbon metabolism (dMRM) targeted CCM	Extraction in methanol:water (50:50) with isotope-labelled internal standards; GC–MS with MOX/BSTFA derivatisation; LC–MS on Agilent 6470 LC-QqQ (ion-pair RP using dMRM database/method); multivariate (PCA/PLS-DA/OPLS-DA) and univariate (t-test, ANOVA) analyses; ChemRICH; biomarker ROC/AUC	Human faecal contamination (clarified human faeces containing norovirus GII) and municipal sewage (1%); focus on host metabolic response rather than chemical contaminants	Water/seawater and sewage used; norovirus quantified from digestive gland via ISO method/RT-qPCR; no sediment/soil	Treatment type (control seawater vs sewage vs human faeces), exposure duration (12 h), tissue type; biomass normalization using freeze-dried weight	Randomised sequences; pooled biological QC (PBQC) and matrix-free QC inserted regularly; labelled internal standards; reported RSDs for QC materials; signal-to-noise cutoff ≥10; outlier control via Hotelling 95% ellipse on OPLS-DA	Significant metabolites/features via ANOVA (FDR-adjusted p≤0.05) and other tests; biomarker performance assessed via ROC/AUC (e.g., sterols/glutathione patterns in gills; nicotinamide in digestive gland). Standards: isotope-labelled internal standards and QC mixes.	Single-stressor lab exposure comparing two faecal sources; not a field synergy/antagonism design	No full characterisation of sewage/faeces matrices (e.g., 16S rRNA or chemical composition) and their influence on metabolome; no technical tank replicates (focus on biological replicates); biomarker validation needed in follow-up studies	Supplementary data available with article; norovirus results reported; metabolomics data in supplementary and by request as per journal	Yes (mentions MSI minimum reporting standards; Griffin et al., 2007)	Yes (human faeces supplied for norovirus surveillance; instruments and automation provided by Agilent; ISO method referenced for norovirus)	Lab reared organisms exposed to field samples (mesocosms)	Lab reared organisms exposed to field samples (mesocosms)
	Primary research	A multi-platform metabolomics approach to investigate the effects of acute thermal stress on New Zealand black-footed abalone (Haliotis iris)	Nguyen et al. 2025	https://doi.org/10.1016/j.fishres.2025.107426	Short communication using multi-platform metabolomics and lipidomics (GC–MS + targeted LC–MS + LC–QTOF lipidomics) to assess acute thermal stress responses in adult Haliotis iris exposed to 14, 19, and 24°C for 24 h.	Haliotis iris (New Zealand black-footed abalone/pāua)	Chatham Islands (collection location; coordinates not provided)	Adult abalone n=24; 3 temperature treatments (14/19/24°C) with 8 individuals per 100 L tank (single tank per treatment); 24 h exposure after ramping (1°C/hour)	Laboratory experiment (collection field site not specified)	Foot (adductor) muscle tissue (~300 mg collected; ~10 mg used per platform extraction)	Both: GC–MS untargeted profiling; LC–MS targeted CCM (dynamic MRM); LC–QTOF for lipidomics (feature/annotation based)	GC–MS with methylchloroformate (MCF) derivatization; LC–MS targeted CCM on Agilent 6470 LC/TQ; lipidomics on Agilent 6546 QTOF with Profinder; normalization to biomass and internal standards; PLS-DA with LOOCV; one-way ANOVA with Fisher’s LSD	Thermal stress (14, 19, 24°C); no chemical contaminants	Seawater parameters measured (pH, salinity, DO, etc.); no sediment/soil	Temperature ramp rate (1°C/h), exposure duration (24 h), seven-day acclimation at 14°C, unfed during acclimation/exposure; internal standard normalization and range scaling	GC–MS: blanks with d4-alanine, amino-acid mix, pooled QC injected regularly; LC–MS: internal standards (13C-labelled); lipidomics: d5-TG internal mix; pooled QC samples; filtering of low-abundance and blanks	34 metabolites and 34 lipids significantly altered across temperatures (ANOVA p<0.05); multivariate separation by PLS-DA with LOOCV; standards/internal standards used for normalization and QC	No (single-stressor temperature gradient in laboratory)	Single tank per treatment (no tank-level replication); acute 24 h exposure may not represent full marine heatwave complexity; fasting may influence energy metabolites; recommends replicated tanks, ecologically realistic ramping, feeding controls, more tissues	Data available on request (per Data availability statement)	Not reported	Yes (uses MetaboAnalyst; instrument methods/databases; pathway tools and published methods)	Lab reared organisms exposed to field samples (mesocosms)	Lab reared organisms exposed to field samples (mesocosms)
Field Samples collected and used for experiments in a laboratory	Primary research	Metabolomic Investigations of the Temporal Effects of Exposure to Pharmaceuticals and Personal Care Products and Their Mixture in the Eastern Oyster (Crassostrea virginica)	Brew et al. 2020	https://doi.org/10.1002/etc.4627	Time-course untargeted GC–MS metabolomics of eastern oyster adductor muscle following 10-d exposures to four PPCPs (fluoxetine, DEET, EE2, diphenhydramine) individually or as a mixture (1 µg/L each), plus an 8-d depuration; evaluates temporal trajectories and mixture predictability.	Crassostrea virginica (eastern oyster)	Sapelo Island, Georgia, USA (collection location; exact coordinates not provided)	20 aquaria with 14 oysters/tank; 3 replicate tanks per treatment (5 individual PPCPs + mixture) and controls; adductor muscle sampled at days 0, 1, 5, 10, and 18 (depuration day 8), 2 oysters per replicate tank per timepoint (n=6/treatment/timepoint; controls n=10/timepoint).	Laboratory exposure (organisms collected from 1 field site)	Adductor muscle	Untargeted metabolomics (GC–MS polar phase); targeted chemical verification by LC–MS/MS for water and body burdens	Dual-phase extraction (water/chloroform/methanol) adapted from Viant; polar derivatization (MOX then BSTFA+TMCS); GC–TOF-MS; preprocessing/alignment with METAlign; multivariate PLS-DA with LOOCV and trajectory analysis; SAM and t-tests for differential metabolites; putative ID via NIST library.	PPCPs: fluoxetine, DEET, 17α-ethynylestradiol (EE2), diphenhydramine, and mixture (1 µg/L each; 4 µg/L total for mixture)	Water analyte concentrations and tissue body burdens quantified by LC–MS/MS (SRM; EE2 derivatized with dansyl chloride); no sediment/soil	Exposure duration (10 d) and depuration (8 d), time-series sampling, single vs mixture exposures, salinity/temperature/light controlled, daily partial water renewal	PLS-DA outlier check via Hotelling T2 (95% CI); LOOCV model validation; chromatogram alignment/filters; NIST match threshold (>700) for IDs; consistent sampling and randomization	Significant bins/metabolites identified via SAM (p≤0.05) and t-tests (p≤0.05); pathway mapping via KEGG; mixture effects not well predicted from individuals; incomplete recovery after depuration. Standards used for LC–MS/MS transitions; derivatization for EE2.	Yes—chemical mixture effects assessed; mixture did not cluster with individuals and showed non-additive/unpredictable pathway impacts	Untargeted IDs are putative; recommends integrating metabolomics with additional endpoints (oxygen consumption, glycogen, growth); longer depuration may be needed for full recovery; mixture complexity beyond tested set	Data available on Figshare (project link in paper)	Not reported	Yes (NIST library; KEGG; METAlign; MetaboAnalyst; Figshare repository)	Field Samples collected and used for experiments in a laboratory	Field Samples collected and used for experiments in a laboratory
	Primary research	An integrated metabolomic and proteomic study of toxic effects of Benzo[a]pyrene on gills of the pearl oyster Pinctada martensii	Chen et al. 2018	https://doi.org/10.1016/j.ecoenv.2018.03.040	Integrated 1H NMR metabolomics and 2-DE proteomics (MALDI-TOF/TOF) to assess gill toxicity of benzo[a]pyrene (BaP) in pearl oysters at 1 and 10 µg/L over 7 days.	Pinctada martensii (pearl oyster)	Collected from harbor site at Lingshui, Hainan, China (coordinates not provided)	Exposure groups: seawater, solvent control (0.001% acetone), BaP 1 µg/L, BaP 10 µg/L; 30 oysters per 40 L aquarium; metabolomics n=12 biological replicates per treatment; proteomics 3 biological replicates per treatment (4 pooled oysters per replicate).	Laboratory exposure (organisms sourced from 1 field location)	Gill tissue	Untargeted metabolomics (1H NMR) + untargeted proteomics (2-DE spot-based)	Polar metabolite extraction (methanol/chloroform/water) with TSP in D2O buffer; 1D 1H NMR (Bruker AV500) with NOESY sequence; generalized log transform; PLS-DA and O-PLS-DA (SIMCA-P+) to identify discriminating metabolites.	Benzo[a]pyrene (BaP) at 1 and 10 µg/L	Seawater used/renewed daily; no sediment/soil; contaminant is dosing concentration	Dose (1 vs 10 µg/L), solvent control, 7-day exposure, fasting during exposure, acclimation conditions (pH/salinity) and feeding before exposure	Internal standard TSP for NMR; spectral parameters fixed; O-PLS-DA/PLS-DA; proteomics: Bradford assay, spot selection threshold (>1.5-fold; p<0.05), MALDI calibration mixture	Metabolomics: significant metabolite shifts detected mainly at 10 µg/L (arginine, phosphocholine, malonate, acetoacetate ↑; glucose, BCAAs, glutamine, threonine ↓). Proteomics: 13 proteins altered across doses. Standards: TSP for NMR; CalMix5 for MALDI calibration.	No (single contaminant dose-response; integrated multi-omics)	NMR sensitivity limited (<50 metabolites detected); low-dose effects may be missed; metabolite changes mainly at high dose	Not specified in extracted text; results include tables of altered metabolites/proteins	Not reported	Yes (databases: KEGG, UniProt; Mascot search; literature chemical shifts)	Field Samples collected and used for experiments in a laboratory	Field Samples collected and used for experiments in a laboratory
	Primary research	NMR-based characterization of the acute metabolic effects of weathered crude and dispersed oil in spawning topsmelt and their embryos	Van Scoy et al. 2012	https://doi.org/10.1016/j.ecoenv.2011.11.009	Study compares toxicity and metabolic responses of physically dispersed oil (WAF) vs chemically dispersed oil (CEWAF; Corexit 9500) from weathered Prudhoe Bay crude oil in adult topsmelt and embryos; includes direct embryo exposures and maternal exposure/spawning endpoints.	Atherinops affinis (topsmelt); embryos	Adults collected from Elkhorn Slough, Monterey County, CA, USA; laboratories at Marine Pollution Studies Laboratory (Granite Canyon, CA) (exact coordinates not reported)	Adults: 3 replicate tanks per concentration, 15 fish/replicate; 1 surviving adult/replicate sampled for metabolomics at 96 h. Embryo direct exposure: ~10–20 embryos per concentration sampled for metabolomics; maternal embryo analysis limited by low egg production (often 1 replicate).	Laboratory exposures; oil prepared in replicate carboys (field sites only for organism collection)	Adult skeletal muscle; embryo whole extracts	Untargeted (1H NMR fingerprints with targeted peak integration of selected metabolites)	1D 1H NMR spectroscopy (500 MHz adults; 600 MHz embryos) after methanol:water (2:1) extraction; binning (0.005 ppm) and total spectral area normalization; PCA for fingerprints; one-way ANOVA on selected metabolite peak areas.	Weathered Prudhoe Bay crude oil WAF and CEWAF (Corexit 9500); hydrocarbons (THC/TPH), PAHs, BTEX quantified in exposure waters	Exposure water chemistry analysed for THC/TPH (GC-FID), PAHs and BTEX (GC/MS); no sediment/soil	Oil treatment (WAF vs CEWAF), multiple oil loadings/doses, life stage (adult vs embryo), exposure duration (96 h), grow-out (78 d) and depuration/spawning observations	Internal chemical shift standard (TMSP) for NMR; spectral preprocessing (phasing, baseline correction, normalization); replicate exposure design for adults; outlier inspection via PCA	Adults: few significant metabolite changes (e.g., lactate decreased for WAF; phosphocreatine decreased for CEWAF) by ANOVA; embryos directly exposed showed multiple significant metabolite changes by ANOVA. Standards: TMSP for NMR calibration.	Mixture/interaction focus is WAF vs CEWAF (oil + dispersant) rather than factorial stressor interaction; compares dispersed vs non-dispersed oil impacts	Low egg production limited replication for maternally exposed embryos; tissue hydrocarbon burdens not measured; reproductive tissues not assessed by metabolomics; potential lipid interference in spectra.	Not explicitly stated; results provided in paper tables; metabolomics and chemistry summarized in manuscript	Not reported	Yes (oil/dispersant supplied commercially; chemical analyses at CA Dept. Fish and Game lab; embryos from Aquatic Biosystems)	Field Samples collected and used for experiments in a laboratory	Field Samples collected and used for experiments in a laboratory
	Primary research	Metabolic responses of the growing Daphnia similis to chronic AgNPs exposure as revealed by GC-Q-TOF/MS and LC-Q-TOF/MS	Zhang et al. 2017	https://doi.org/10.1016/j.watres.2017.02.046	Water Research study establishing baseline life-cycle metabolome kinetics of Daphnia similis (day 0–21) and assessing chronic metabolic responses to AgNPs (0, 0.02, 1 ppb) using combined GC-QTOF-MS and LC-QTOF-MS; detects early metabolic perturbations without visible morphological change.	Daphnia similis	Not applicable (lab culture; organism sourced from Shanghai Ocean University, China)	Acute: neonates <24 h, triplicates, 6 neonates per group across concentrations; Chronic: 6 replicate vessels per concentration, 5 neonates per vessel in 100 mL; samples collected days 0,2,5,7,10,13,21 and pooled per timepoint for metabolomics.	Laboratory exposures	Whole Daphnia pooled samples (freeze-dried extracts)	Untargeted metabolomics (GC-QTOF-MS + LC-QTOF-MS)	Methanol:water (4:1) extraction with FMOC-glycine internal standard; LC-QTOF-MS (Agilent 1290/6540, ESI+/−) and GC-QTOF-MS (Agilent 7890A/7200, EI) with derivatization (methoxyamine + MSTFA); data processing with MZmine; feature filtering (RSD<30%, DF=100%); multivariate PCA/OPLS-DA (SIMCA-P); Kruskal-Wallis p<0.05 and VIP>1 for significance; metabolite ID via METLIN/HMDB and NIST11 + retention i…	Silver nanoparticles (AgNPs) 0.02 and 1 ppb	Exposure in ASTM hard freshwater; AgNP characterization (TEM, hydrodynamic diameter); no sediment/soil	Time-series life cycle stage; AgNP concentration; chronic exposure and feeding; compares baseline metabolic cycle to exposure-induced shifts	QC samples clustered in PCA; internal standard normalization; mass calibration for GC every ~5 samples; feature screening by RSD/DF; missing value imputation	42 metabolites identified; significance by VIP>1 and p<0.05 (Kruskal-Wallis) across comparisons; notes early abrupt changes during first 10 days with steady state by day 13. Standards: FMOC-glycine internal standard and n-alkanes for retention indices.	No (single stressor AgNPs; but includes baseline developmental trajectory as context)	No explicit limitations in extracted pages; notes mechanisms unclear for some temporal patterns and potential influence of reproductive cycle.	Supplementary data available via journal link	Not reported	Yes (METLIN/HMDB, NIST11; MetaboAnalyst; OECD/ISO guidance)	Field Samples collected and used for experiments in a laboratory	Field Samples collected and used for experiments in a laboratory
	Primary research	Metabolite changes behind faster growth and less reproduction of Daphnia similis exposed to low-dose silver nanoparticles	Wang et al. 2018	https://doi.org/10.1016/j.ecoenv.2018.07.080	21-day chronic OECD 211 exposure of Daphnia similis to environmentally encountered AgNP concentrations (0.02 and 1 ppb) showing increased growth (length/dry mass) but reduced reproduction; dual-platform non-targeted metabolomics (LC-QTOF-MS and GC-QTOF-MS) used to identify metabolic mechanisms (amino acids up; fatty acids down).	Daphnia similis	Not applicable (lab culture; Shanghai Ocean University source)	Chronic test: 180 neonates per concentration (0, 0.02, 1 ppb) divided into 9 beakers (400 mL) each; metabolomics: 10 individuals randomly selected from each replicate for measurement/sample; QC samples used (PCA clustering).	Laboratory exposures	Whole Daphnia (freeze-dried extracts)	Untargeted metabolomics (LC-QTOF-MS + GC-QTOF-MS)	Extraction with methanol:water (4:1) containing FMOC-glycine internal standard; LC-QTOF-MS (Agilent 1290/6540 QTOF, ESI+/−) and GC-QTOF-MS (Agilent 7890A/7200 QTOF, EI) with derivatization (methoxyamine + MSTFA); stats: PCA/OPLS-DA (SIMCA), VIP>1 + t-test p<0.05; metabolite ID via METLIN (LC-MS) and NIST11 with retention index (GC-MS).	PVP-coated silver nanoparticles (AgNPs) 0.02 and 1 ppb	Exposure in reconstituted hard freshwater; AgNP characterization (TEM, DLS); no sediment/soil	AgNP concentration, 21-day exposure with daily medium renewal and feeding schedule; growth endpoints (length/dry mass) and reproduction endpoints (time to first brood, neonates).	QC samples clustered in PCA; internal standard normalization (FMOC-glycine); real-time reference standards for LC mass accuracy; retention index confirmation for GC; VIP+p thresholds.	18 significantly changed metabolites (VIP>1, p<0.05) among 41 identified; amino acids upregulated and fatty acids altered; standards: FMOC-glycine internal standard; MS/MS and library matching.	No (single stressor AgNP dose comparisons)	Not explicitly stated in extracted pages; focuses on low-dose chronic exposures and metabolite associations with phenotypes.	Supplementary data available with article DOI	Not reported	Yes (METLIN, NIST11; KEGG; SIMCA; MeV)	Field Samples collected and used for experiments in a laboratory	Field Samples collected and used for experiments in a laboratory
	Primary research	Integrated approach of eco-epigenetics and eco-metabolomics on the stress response of bisphenol-A exposure in the aquatic midge Chironomus riparius.	Lee et al. 2018	https://doi.org/10.1016/j.ecoenv.2018.06.084	Integrated ecotoxicity assays (acute/chronic), DNA damage (comet), eco-epigenetics (global DNA methylation and histone methylation marks) and non-targeted 1H NMR metabolomics to elucidate BPA stress-response mechanisms in 4th instar Chironomus riparius larvae, including epigenetics–metabolomics crosstalk.	Chironomus riparius (non-biting midge), 4th instar larvae	Not reported (lab colony in Republic of Korea)	Acute toxicity: 10 larvae per concentration (1, 2.5, 5, 7 mg/L) + control; Chronic: 30 larvae per aquarium at 1 mg/L (LC10) with monitoring for 25 days; Comet assay: 10 larvae per group, ~50 cells/slide, 3 slides; Epigenetics and metabolomics performed at 48 h exposure to 1 mg/L (LC10) (replicates reported as n=3 for some endpoints).	Laboratory exposures	Whole-body extracts (metabolomics); whole larvae for DNA/histone extraction	Untargeted metabolomics (1H NMR) + targeted epigenetic endpoints (global methylation)	1H NMR at 600 MHz (Agilent 600); metabolite identification with Chenomx 600 MHz library; OPLS-DA separation and ANOVA for significant metabolites; pathway enrichment with MetaboAnalyst 3.0.	Bisphenol A (BPA) at LC10 (1 mg/L) for mechanistic assays; acute LC values estimated (48h LC10 1.29 mg/L etc.)	Exposure water prepared in EPA moderately hard water; no sediment/soil	Exposure concentration (LC10), exposure time (48 h for mechanistic assays), temperature/photoperiod; chronic reproduction/development endpoints; acetone carrier used in some setup	NMR processing via Chenomx; statistical testing with ANOVA and Tukey HSD; epigenetic assays included positive/negative controls for standard curve in methylation kit; comet assay standardized parameters.	Significant metabolite changes via ANOVA (p<0.05/p<0.01) and OPLS-DA; epigenetics significant hypermethylation of DNA and H3K36; standards: TMSP not mentioned; methylation kits included standards/controls; metabolite IDs from Chenomx library.	No (single chemical stressor; integrates multi-omics endpoints)	Not explicitly stated in extracted pages; study focuses on one sublethal concentration and global (not locus-specific) epigenetic marks.	Supplementary data available with article DOI	Not reported	Yes (MetaboAnalyst; Chenomx library; OECD/USEPA guidelines and kits)	Field Samples collected and used for experiments in a laboratory	Field Samples collected and used for experiments in a laboratory
	Primary research	Metabolomics approach reveals disruption of metabolic pathways in the marine bivalve Mytilus galloprovincialis exposed to a WWTP effluent extract	Dumas et al. 2020	https://doi.org/10.1016/j.scitotenv.2020.136551	Non-targeted LC-HRMS metabolomics on digestive glands of male Mediterranean mussels exposed 7 d to an urban WWTP effluent extract (5% equivalent dilution), with chemical screening of effluent (PhACs/pesticides) and pathway interpretation.	Mytilus galloprovincialis (Mediterranean mussel)	Mussels from Bouzigues, France; WWTP in Hérault, France (coordinates not provided)	10 aquaria with 5 mussels each (n=50). Five aquaria solvent control and five aquaria WWTP extract; metabolomics on males: n=9 controls and n=10 exposed.	1 WWTP + 1 mussel culture source; laboratory exposure	Digestive gland	Untargeted LC-HRMS metabolomics (ESI+ and ESI−) with targeted screening of 80 contaminants in effluent	Biphasic extraction (MeOH/DCM/H2O) from 30 mg dry tissue; LC-HRMS (Exactive Orbitrap) on PFPP column; features via XCMS; PCA/OPLS-DA (SIMCA); pathway analysis via MetaboAnalyst.	WWTP effluent extract (38 pharmaceuticals + 4 pesticides detected); exposure equivalent to 5% effluent dilution.	Effluent extracted by SPE (Oasis HLB) and screened by LC-HRMS; seawater pH/temp/O2 monitored; no sediment/soil.	Exposure type (solvent control vs WWTP extract), 7-day exposure, daily static renewal, controlled temperature/salinity, feeding.	Pooled QC injected repeatedly; feature retained if QC RSD<30%; random injection order; Welch t-test; log transform and Pareto scaling.	Discriminant features selected (p<0.1, amplitude >30%); 23 metabolites confirmed with standards (level 1) and 15 putatively annotated (level 2). Includes amino acids, purine/pyrimidine metabolites, TCA intermediates, oxidized glutathione.	Yes (complex mixture exposure) though not factorial; notes potential additive/synergistic interactions.	Inter-individual variability; limited metabolite identification due to incomplete mussel metabolome; recommends field confirmation.	Supplementary data available via journal DOI	Yes (metabolite identification levels referenced to Sumner et al., 2007)	Yes (HMDB, KEGG, MetaboAnalyst, XCMS; external RT behavior reference)	Field Samples collected and used for experiments in a laboratory	Field Samples collected and used for experiments in a laboratory
	Primary research	Identifying health impacts of exposure to copper using transcriptomics and metabolomics in a fish model	Santos et al. 2010	https://doi.org/10.1021/es902558k	Integrates hepatic transcriptomics (cDNA microarray) and 1H NMR metabolomics plus phenotypic endpoints to identify pathways and health impacts of environmentally relevant waterborne copper exposure in male stickleback.	Gasterosteus aculeatus (three-spined stickleback), males	Not reported (UK laboratory exposures)	Five Cu concentrations (3.2, 10, 32, 64, 128 µg/L) + water control; duplicate tanks; 4-day exposure; pooled RNA from 8 fish per group in initial screen; individual transcriptomes analyzed for 10/32/128 µg/L; comet assay on blood cells.	Laboratory exposure	Liver (transcriptome and metabolome); blood cells (comet assay)	Metabolomics: untargeted 1H NMR; transcriptomics: microarray; targeted RT-qPCR validation	One-dimensional 1H NMR spectroscopy on liver extracts with SAM statistics and PCA; integration with microarray analysis; RT-qPCR validation of selected genes.	Copper (waterborne) 3.2–128 µg/L	Water Cu concentrations measured by DPASV-HMDE; water sampled throughout.	Cu concentration gradient; exposure duration (4 d); duplicate tanks; controlled husbandry; endpoints included DNA damage and morphometrics (HSI/GSI/condition).	Measured exposure concentrations (70–88% nominal); SAM/FDR control; PCA; RT-qPCR validation; appropriate statistical tests (ANOVA/rank-based, Mann-Whitney).	DNA strand breaks increased at all concentrations; hepatic NAD+ and lactate increased and metabolome shifted concentration-dependently; cholesterol biosynthesis genes strongly downregulated at 128 µg/L with RT-qPCR confirmation.	No (single contaminant gradient)	Short-term lab exposure; metabolite fold-changes modest though significant; suggests conserved pathways across vertebrates.	Microarray data deposited in ArrayExpress (E-MAXD-42 and E-MAXD-43)	Not reported	Yes (ArrayExpress, GeneSpring; prior methods and EPA criteria referenced)	Field Samples collected and used for experiments in a laboratory	Field Samples collected and used for experiments in a laboratory
	Primary research	NMR-based metabolic toxicity of low-level Hg exposure to earthworms	Tang et al. 2018	https://doi.org/10.1016/j.envpol.2018.04.027	Two-dimensional NMR metabolomics to investigate sublethal metabolic toxicity in Eisenia fetida earthworms after 2-week exposure to environmentally relevant low mercury-contaminated soil; integrates histology and proposes metabolic network links/biomarkers.	Eisenia fetida (earthworm)	Soil collected from Baodi District, Tianjin, China: 39°41′N, 117°25′E	Soil exposure: 10 earthworms per pot, 3 replicate pots per treatment, 14 d. Metabolomics: 10 individuals per group homogenized/analysed. THg/MeHg: 6 worms selected; histology: 3 worms per group.	1 soil source (aged spiked soil maintained in lab); laboratory exposure	Whole-body homogenate (polar metabolites); posterior gut for histology	Untargeted metabolomics (1H NMR with 2D validation: 1H-1H TOCSY and 1H-13C HSQC)	Two-step extraction (methanol/water and chloroform/water buffers) with TSP internal standard; 1D 1H NMR (500 MHz NOESYPRESAT) plus 2D TOCSY and HSQC; binning and PQN normalization; PCA/OPLS-DA with permutation testing; correlation network analysis (igraph).	Soil mercury (spiked with HgCl2 aged); THg in soil 0.77±0.09 mg/kg vs control 0.05±0.01 mg/kg; MeHg quantified; earthworm THg/MeHg assessed.	Soil THg/MeHg measured (AFS and GC-CVAFS); soil pH and organic carbon reported.	Exposure (control vs low-level Hg soil), 14-day duration, depuration periods; constant temperature/humidity/light.	TSP internal reference; PQN normalization and Pareto scaling; OPLS-DA validated by 2-fold CV and 2000 permutations; metabolite IDs cross-validated with 2D NMR and HMDB/Chenomx.	Student’s t-test and OPLS-DA identified metabolite shifts: glutamine and HEFS decreased; glycine, alanine, glutamate, scyllo-/myo-inositol, t-methylhistidine increased; TSP internal standard.	No (single contaminant low-level Hg in soil)	Traditional endpoints (mortality/weight) insensitive at low Hg; future multi-omics suggested; mechanisms inferred from networks.	Supplementary data available via journal DOI	Not reported	Yes (HMDB, Chenomx suite; R packages; published metabolite libraries)	Field Samples collected and used for experiments in a laboratory	Field Samples collected and used for experiments in a laboratory
Wildlife‑derived cell lines	Review	Understanding PFAS toxicity through cell culture metabolomics: Current applications and future perspectives	Nguyen et al. 2024	https://doi.org/10.1016/j.envint.2024.108620	Review of how cell culture metabolomics (2D/3D, primary cells and cell lines) is being applied to understand PFAS toxicity, including key pathways disrupted (lipids, amino acids, mitochondria), biomarker discovery, and future integration with single-cell metabolomics, imaging MS, extracellular flux analysis and multi-omics.	Multiple (review; includes human and model organism cell cultures)	Not applicable	Not applicable (review)	Not applicable	Cell cultures (primary cells and established cell lines; 2D and 3D systems) (review)	Both discussed (review; includes targeted/untargeted metabolomics and lipidomics)	Discusses workflow steps (collection/quenching/extraction/profiling/data analysis) and platforms (LC-MS, GC-MS, UHPLC-MS, CE-MS, IM-MS; NMR), pathway tools (MetaboAnalyst, KEGG, LipidMaps) and integration with other endpoints.	PFAS broadly (e.g., PFOA, PFOS, PFHxA, PFBS, 6:2 Cl-PFESA) and other environmental contaminants discussed as context	Not applicable (review)	Highlights differences by cell type (primary vs cell line), culture system (2D vs 3D), PFAS compound, dose and duration; emphasizes standardization of quenching/harvesting and normalization.	Discusses need for standardized methodology, careful quenching and normalization strategies; emphasizes data processing/normalization and use of statistical methods (PCA/PLS-DA etc.) (review).	Summarizes reported PFAS-induced metabolic perturbations across studies and biomarker candidates; standards depend on individual studies (review).	Discusses mixtures and integration with other technologies/omics; not a primary experimental multiple-stressor test (review)	Notes limited number of PFAS cell-culture metabolomics studies, heterogeneity of models, need for standardization, challenges in sensitivity/spatiotemporal dynamics and multi-omics integration.	No data used for the article (stated)	Not specified in extracted text	Yes (compiles literature; references pathway databases and tools)	Wildlife‑derived cell lines	Wildlife‑derived cell lines
	Primary research	Red blood cell metabolism in Rhesus macaques and humans: comparative biology of blood storage	Stefanoni et al. 2020	https://doi.org/10.3324/haematol.2019.229930	Comparative metabolomics and lipidomics of leukofiltered red blood cells (RBC) from Rhesus macaques and humans during refrigerated storage (0–42 days) including [1,2,3-13C3]glucose tracing; highlights species- and sex-specific differences relevant for transfusion models.	Macaca mulatta (Rhesus macaque) and Homo sapiens	Rhesus colony on Morgan Island, South Carolina, USA; human donors in USA (exact coordinates not reported)	Rhesus macaques n=20 (10M/10F, ~5 years) and humans n=21 (11M/10F, 30–75 years). Stored RBC sampled days 0,7,14,21,28,35,42; tracing incubations with 13C-glucose for 1 h.	Single rhesus colony; human volunteers (not site-specific); laboratory storage study	Red blood cells and supernatants (storage media)	Both: targeted metabolomics with stable isotope-labeled internal standards; untargeted metabolomics and lipidomics	UHPLC-MS metabolomics/lipidomics (Vanquish UHPLC + Q Exactive MS). Extraction with methanol:acetonitrile:water (5:3:2). Data processing with Compound Discoverer/LipidSearch; statistics with t-tests/repeated measures ANOVA and MetaboAnalyst.	Not an environmental contaminant study; assesses storage-induced metabolites, lipid oxidation products, plasticizers (phthalates) and xenometabolites (e.g., caffeine, cotinine) in stored RBC	Not applicable	Species (human vs macaque), sex, storage time (0–42 d), standardized storage solution (AS-3) and temperature (4–6°C), isotope tracing.	Leukofiltration; standardized storage bags; targeted quantification against stable isotope-labeled standards; repeated measures statistics.	PLS-DA and hierarchical clustering/t-tests for differences; targeted validation with stable isotope-labeled internal standards; identified differences in glutathione/sulfur, purine oxidation, arginine metabolism, acylcarnitines, lipid peroxidation.	No (comparative biology/storage conditions; xenometabolite exposome noted)	Anesthesia in macaques; donor age differences; colony genetic background; storage additive optimized for human RBC; inability to resolve some isobars.	Online supplementary materials; not explicitly indicating a public metabolomics repository in excerpt.	Not reported	Yes (MetaboAnalyst; LipidSearch; Compound Discoverer; dietary/drug xenometabolite interpretation)	Wildlife‑derived cell lines	Wildlife‑derived cell lines
	Review	Experimental design and reporting standards for metabolomicsstudies of mammalian cell lines	Hayton et al. 2017	https://doi.org/10.1007/s00018-017-2582-1	Review proposing standardized experimental design and minimum reporting standards for mammalian cell culture metabolomics, highlighting discrepancies across studies in quenching, extraction, and normalization; provides recommended reporting checklist and best-practice workflow.	Mammalian cell lines (review)	Not applicable	Not applicable (review)	Not applicable	Cultured mammalian cell lines and culture media (intracellular and extracellular metabolites)	Focus on MS-based untargeted metabolomics in cell culture, but discusses targeted studies and multiple platforms	Compares reported practices across studies (washing/quenching solvents, scraping vs trypsinization, mono/biphasic extraction, homogenization) and recommends best-practice steps; discusses QC pooled samples and normalization (cell number, DNA, protein, TIC).	Not applicable (methods/standards review; examples include drugs/toxins/nanoparticles in surveyed literature)	Not applicable	Emphasizes culture conditions (media, serum, passage number, confluence), treatment dose/time, quenching timing/temperature, separation of intra/extracellular pools, and biomass normalization.	Recommends pooled QC samples, internal standards for instrumental drift, documentation of extraction recovery/stability; discourages trypsinization due to metabolite leakage; highlights need for consistent reporting.	Not an outcomes paper; discusses statistical needs and normalization approaches; references MSI/CIMR reporting standards for in vitro biology.	Not applicable	Notes lack of consensus and inconsistent reporting; need for studies on passage-number effects; normalization controversies; calls for community adoption of standards.	Not applicable (review)	Yes (discusses Metabolomics Standards Initiative and CIMR in vitro reporting document)	Yes (literature synthesis; MSI/COSMOS resources)	Wildlife‑derived cell lines	Wildlife‑derived cell lines
	Primary research	Investigating chemical risk in green and loggerhead turtles foraging in Moreton Bay using species-specific cell-based bioassays	Kenney et al. 2025	https://doi.org/10.1016/j.marpolbul.2025.117589	Blood from green and loggerhead turtles foraging in Moreton Bay was extracted for organic contaminants (QuEChERS) and tested for cytotoxicity in species-specific primary fibroblast cell cultures; assesses whether trophic differences translate to different chemical risk.	Chelonia mydas (green turtle) and Caretta caretta (loggerhead turtle)	Moreton Bay, Queensland, Australia (sample region eastern banks; coordinates not provided)	Blood samples from 14 sub-adult green turtles and 14 loggerheads (sub-adult/adult) collected May 25–27, 2021. Extracts tested in duplicate wells with minimum two assay trials; EC20 derived from 2-fold 4-point dilution up to REF=2.	One foraging area (Moreton Bay); laboratory bioassay	Whole blood extracts; primary skin fibroblast cell cultures (GT12s-p green; LT05s-p loggerhead)	Effect-based mixture toxicity (non-targeted extraction); targeted endpoint cytotoxicity	N/A (resazurin cell viability assay; EC20, toxic units TU calculated; non-targeted QuEChERS extraction of organics)	Mixtures of organic contaminants extracted from turtle blood (QuEChERS targets POPs, pesticides, PAHs broadly); chromium used as reference compound	Not directly (focus is blood extracts)	Species, cell line (species-specific sensitivity), mixture toxicity, relative enrichment factor, QA/QC threshold RSD 20% for within-trial replicates, additional trials up to 5 if needed.	Method blanks (Milli-Q water), positive control Triton X-100 0.1%, negative controls media; reference compound Cr; replicate RSD thresholds; substitution for non-detect effects.	TU from EC20; Mann-Whitney test showed no significant difference between species' extracts in species-specific cells; loggerhead extracts more toxic in green cells in majority; correlation between responses in both cell lines.	Yes—complex mixture effects from environmental exposures in blood extracts (mixture interactions acknowledged)	Small sample size; cytotoxicity only (other endpoints may differ); temporal variability highlighted; data available on request.	Data available on request	Not applicable	Yes (QuEChERS method validated in prior studies; references; Queensland Govt flood history cited)	Wildlife‑derived cell lines	Wildlife‑derived cell lines
	Primary research	Towards the development of standardised sea turtle primary cell cultures for toxicity testing	Finlayson et al. 2019	https://doi.org/10.1016/j.ecoenv.2019.01.117	Assesses within- and between-individual variability in cytotoxicity responses of primary skin fibroblast cultures from green and loggerhead turtles exposed to five contaminants; proposes framework for standardized species-specific in vitro assays.	Chelonia mydas (green turtle) and Caretta caretta (loggerhead turtle)	Queensland, Australia: Moreton Bay, Hervey Bay, Mon Repos, Boyne River/Gladstone (coordinates not provided)	Cell cultures from 7 green turtles and 5 loggerheads; each contaminant tested in duplicate wells per run, at least two independent assay runs per compound; passages 6–15 used; resazurin viability after 24 h exposure.	Multiple sampling locations within QLD; in vitro lab assays	Primary skin fibroblast cell cultures	Not metabolomics; targeted cytotoxicity assay	N/A (resazurin cell viability assay; EC50 calculated with Hill slope equation in GraphPad Prism)	DEET, iodoacetic acid (IAA), cadmium nitrate (CdII), zinc chloride (ZnII), sodium chromate (CrVI)	Not applicable	Species, individual cell culture variability, contaminant concentration (7-point serial), exposure time (24 h), solvent controls and positive control (Triton X-100)	Negative controls (MeOH/water), positive control (1% Triton X-100), replicate runs; within-culture and between-culture RSD computed; passage range controlled.	EC50 values derived from dose-response curves; variation generally within factor of five across cultures; no metabolomics standards.	No (single-compound exposures in vitro)	Limited number of cultures; adults mostly for loggerheads; recommends keeping solvent <0.1% in future for subtle endpoints; FBS batch variation may affect metals speciation.	Supplementary data available via journal DOI	Not applicable	Yes (OECD guidance referenced; literature comparisons)	Wildlife‑derived cell lines	Wildlife‑derived cell lines
Strengths and weeknesses	Review	The metabolomics of oxidative stress	Noctor et al. 2015	https://doi.org/10.1016/j.phytochem.2014.09.002	Review of oxidative stress metabolism in plants with emphasis on ROS, antioxidants/redox buffers, and metabolite signatures; discusses measurement challenges and reanalyzes datasets from catalase-deficient (cat2) plants as model oxidative stress systems.	Plants (primarily Arabidopsis thaliana; review)	Not applicable	Not a primary new experiment overall; reanalysis of published datasets; includes examples with biological repeats (e.g., 3–6) in figures.	Not applicable (laboratory plant studies)	Plant tissues (leaf extracts) and metabolites; discusses compartmental pools (chloroplast, mitochondria, peroxisome, apoplast, vacuole)	Both discussed; notes relatively few non-targeted studies specifically focused on oxidative stress; includes non-targeted GC–MS profiling of polar metabolites in cat2 datasets.	Discusses non-targeted profiling (e.g., GC–MS of derivatized polar metabolites) and targeted assays (LC–MS/MS for lipid peroxides, HPLC for antioxidants); emphasizes compartmentation and marker metabolites (e.g., GSH/GSSG, lipid-derived electrophiles, amino acids).	Not environmental contaminants per se; oxidative stress induced by conditions (excess light, drought, pathogens, pollutants) and genetic catalase deficiency; discusses ROS and oxidation products.	Not applicable	ROS type and compartment (singlet oxygen vs superoxide vs H2O2), stressors (light, pathogens, pollutants), antioxidant pools, phytohormones (SA/JA/auxin), and genotype (catalase-deficient cat2).	Discusses challenges/artefacts in ROS quantification; uses multiple assay types for H2O2; emphasizes need for genetically encoded probes; metabolomics relies on statistical significance across multiple studies for robust markers.	Reanalysis identifies metabolites reproducibly altered in cat2 across studies (e.g., gluconate up; myo-inositol down; amino acids, GSSG-related products). Specific standards depend on platforms; not fully detailed in excerpt.	Discusses interactions among stressors and signaling pathways (SA/JA antagonism, ROS compartment effects); not factorial field study.	No single platform measures whole metabolome; ROS measurement is difficult; compartmentation complicates interpretation; no single 'oxidative stress metabolome'.	Supplementary data available via journal (as stated)	Not reported	Yes (reanalyzed published datasets; literature synthesis)	Strengths and weeknesses	Strengths and weeknesses
	Review	On the history of oxidative stress: Concept and some aspects of current development	Sies 2018	https://doi.org/10.1016/j.cotox.2018.01.002	Historical/conceptual review of oxidative stress in redox biology and toxicology; refines definition to include disruption of redox signaling and/or molecular damage; distinguishes oxidative eustress vs distress and surveys sources, adaptive responses, and disease links.	General (review; multiple organisms)	Not applicable	Not applicable (review)	Not applicable	Not applicable	Not applicable	N/A (conceptual review; discusses redox signaling and need for spatiotemporal redox pattern methods)	Not measured; discusses endogenous/exogenous oxidant sources and exposome concept	Not applicable	Defines oxidative stress intensity spectrum; outlines oxidant types and endogenous vs exogenous sources; highlights master regulators (Nrf2/Keap1, NF-κB) and adaptive programs.	Not applicable	Not applicable	Discusses exposome and multiple oxidant sources; not experimental	Notes overuse/oversimplification of term oxidative stress; calls for specific pathway-focused approaches and improved measurement of spatiotemporal redox patterns.	No specific funding; not a data paper	Not applicable	Yes (literature synthesis; Redox Code, exposome concept)	Strengths and weeknesses	Strengths and weeknesses
	Review	Metabolic Flexibility as an Adaptation to Energy Resources and Requirements in Health and Disease	Smith et al . 2018	https://doi.org/10.1210/er.2017-00211	Narrative review describing the concept of metabolic flexibility, physiological regulation (feeding/fasting, exercise), and links to disease states; discusses molecular regulators and interventions.	Primarily humans; includes evidence from animal models (general)	Not applicable	Not applicable (review)	Not applicable	Not applicable (review)	Not applicable	Not a metabolomics methods paper (review; may reference metabolomics/flux studies conceptually)	Not applicable	Not applicable	Discusses physiological states and interventions as conceptual variables	Not applicable	Not applicable	Not applicable	Not extracted (review; general knowledge gaps discussed)	Not applicable	Not applicable	Not applicable	Strengths and weeknesses	Strengths and weeknesses
	Review	Rhythms of behavior: are the times changin'?	Häfker et al. 2020	https://doi.org/10.1016/j.conb.2019.10.005	Review of behavioral rhythms across taxa (diel/circadian, seasonal/circannual, lunar/circalunar, tidal/circatidal) with emphasis on aquatic environments, endogenous oscillators, environmental cues, and anthropogenic disruption (climate change, light pollution, chemicals).	Multiple (review; broad taxonomic coverage incl. humans)	Not applicable	Not applicable (review)	Not applicable	Not applicable	Not applicable	N/A (chronobiology/behavior review; not metabolomics)	Not measured; discusses anthropogenic stressors (light pollution, chemical pollution) as potential threats	Not applicable	Discusses environmental cue types (light, temperature, oxygen, food, pressure, magnetic fields) and endogenous clocks; contrasts terrestrial vs aquatic habitats and naturalistic vs lab conditions.	Not applicable	Not applicable	Discusses interacting rhythms and multiple environmental drivers; not experimental	Mechanistic understanding limited outside few model species; many rhythms/clocks poorly characterized; calls for naturalistic studies and mechanistic work.	Not applicable (review)	Not applicable	Yes (literature synthesis)	Strengths and weeknesses	Strengths and weeknesses
	Review	The blood exposome and its role in discovering causes of disease	Rappaport et al. 2014	https://doi.org/10.1289/ehp.1308015	Review/synthesis of blood exposome; compiles blood concentrations of 1,561 chemicals and maps chemical similarities by concentrations, disease-risk citations and pathways to motivate EWAS.	Humans	N/A	N/A (compiled across studies; subject numbers vary by chemical)	N/A	Blood / serum / plasma (compiled from HMDB and NHANES plus literature)	Compiled targeted measurements; discusses untargeted HRMS capability and limitations.	Data mining + similarity mapping (MetaMapp); discusses HRMS-based untargeted profiling conceptually.	Includes pollutants (e.g., PFAS, PCBs, pesticides, dioxins/furans), metals (e.g., lead, arsenic), plus drugs, food and endogenous molecules (compiled).	No	Categorises chemicals by source; compares distributions; uses Kruskal–Wallis tests for median differences across categories.	Not lab QC; relies on curated databases; uses geometric means when multiple reports.	Statistical significance via Kruskal–Wallis; not a standards/CRM quantification study.	Notes inability to evaluate chemical interactions/mixtures on disease risks.	Database composition biases; pollutant non-detect exclusions; publication/pathway biases; cannot assess interactions.	Supplemental material (e.g., Table S1) summarises compiled chemical data.	No	Yes—HMDB, NHANES, PubMed, NCBI Biosystems, MetaMapp	Strengths and weeknesses	Strengths and weeknesses
	Review	Circadian rhythms and environmental disturbances – underexplored interactions	Prokkola and Nikinmaa 2018	https://doi.org/10.1242/jeb.179267	Commentary synthesising mechanisms linking circadian rhythms with oxygen variability, temperature and xenobiotics in fish; calls for improved temporal sampling designs.	Fish (multiple species discussed in cited literature)	N/A	N/A (commentary)	N/A	N/A (commentary; discusses plasma hormones, liver transcriptome/enzymes in cited examples)	N/A	Not a metabolomics study; discusses endocrine, transcriptomic and enzymatic rhythms; references ecotoxicology examples.	Conceptual/examples include xenobiotics and pharmaceuticals (e.g., diclofenac) in cited studies.	N/A	Stresses controlling for time-of-day, photoperiod, temperature, feeding and acclimation; recommends matched sampling of controls.	N/A	N/A	Highlights interactions among hypoxia, temperature and pollutants with circadian regulation; not a formal synergy/antagonism field test.	Gaps: few studies incorporate rhythmicity; limited cross-species/latitude data; difficult to link transcription to integrative phenotypes.	No primary dataset (commentary)	No	Yes—synthesis based on published literature	Strengths and weeknesses	Strengths and weeknesses
	Book chapter / guidance synthesis	Community insights and guidance from the field	Beale and Jones 2022	http://doi.org/1016/C2017-0-04429-4	Book chapter synthesising lessons from 23 environmental metabolomics case studies; provides checklist and guidance for planning, collecting, analysing and interpreting environmental metabolomics studies.	Multi-taxa (Animalia, Plantae, microbial communities) across case studies	Not systematically provided; stresses need to capture environmental/biological metadata, photos, water quality, weather.	Community guidance: MSI minimum 3; rule of thumb 4–5 biological replicates per treatment; technical replicates often unnecessary with labeled standards and pooled QC.	Variable across case studies; not harmonised.	Variable across case studies (e.g., blood, tissues, whole organisms, soils, sediments, waters).	Mostly untargeted metabolomics; some targeted contaminant and biomarker monitoring in case studies.	Case studies include LC-MS (most common), GC-MS, NMR, FT-ICR-MS, MALDI-MS imaging; some multi-platform and multi-omics approaches.	Subset of case studies include contaminant analyses (e.g., PFAS, pesticides, pharmaceuticals, metals).	Yes (many case studies across aquatic/terrestrial environments).	Source of exposure (field vs lab), acclimation, life history timing, diurnal cycles, environmental metadata, feeding regimes; recommends early pipeline planning and permits/ethics.	Notes lack of universal QC; recommends pooled biological controls, labeled standards, QA/QC samples for extraction efficiency and instrument performance; calls for harmonisation.	Variable; highlights need for authentic standards, robust identification/annotation and biomarker validation.	Many case studies involve multiple perturbations (contaminants, temperature stress, ecosystem changes) but formal synergy/antagonism analyses are uncommon.	Complex matrices bias results; high proportion of unidentified features; metadata gaps; labour-intensive sampling and data analysis; limited standards and SRMs.	No single dataset; based on 23 case studies (published and unpublished).	Yes—explicit discussion of MSI (Morrison et al. 2007; Sumner et al. 2007) and reporting needs.	Yes—case studies plus potential retrospective metadata from regulatory programs and historical weather datasets.	Strengths and weeknesses	Strengths and weeknesses
	Primary research	Standard reporting requirements for biological samples in metabolomics experiments: environmental context	Morrison et al. 2007	http://doi.org/10.1007/s11306-007-0067-1	Metabolomics Standards Initiative (MSI) Environmental Context Working Sub-Group: minimum reporting requirements/metadata for environmental metabolomics samples, environments and processes.	N/A (guideline; covers diverse taxa conceptually)	Recommends reporting latitude/longitude in decimal degrees; not a single study site (N/A).	N/A	N/A	N/A (guideline; discusses sample types incl. tissues, biofluids, soil/sediment/water).	N/A	N/A (reporting standard, not analytical study)	N/A (suggests recording pollutant concentrations where relevant)	Discussed as possible substrates/components; not analysed here.	Emphasises comprehensive metadata (diet, sex, age, strain, cycles, temperature, habitat, etc.) to contextualise metabolomics results.	N/A (focus on metadata standardisation rather than lab QC)	Yes—MSI reporting requirements; ontology/CV recommendations.	Discusses importance of capturing environmental stressors; gives examples of interacting stressors as motivation, but no field synergy test.	Requirements are minimal not exhaustive; modular and extensible.	No primary dataset; worked examples referenced via project resources.	Yes (MSI Environmental Context reporting requirements)	References other standards initiatives (MIAME, MIGS, MIAMET, MIAPE, etc.)	Strengths and weeknesses	Strengths and weeknesses
	Review	Tracking complex mixtures of chemicals in our changing environment	Escher et al. 2020	https://doi.org/10.1126/science.aay6636	Review of approaches to isolate, characterise and track complex chemical mixtures across matrices; integrates HRMS NTA/suspect screening with bioassays and effect-based monitoring.	Multi-context (humans and biota; examples include fish, mussels, polar bears)	N/A	N/A	N/A	Conceptual examples: blood/tissue, biota, dust, passive samplers; plus environmental matrices (water, sediment, soil).	Emphasises untargeted (NTA) and suspect screening; targeted analyses remain essential for some compounds.	HRMS (LC/GC-HRMS), NTA, suspect screening, HRMS/MS; effect-directed analysis (EDA) and in vitro bioassays; mixture modelling (BEQbio/BEQchem).	Broad classes: pesticides, industrial chemicals, pharmaceuticals, plasticizers, flame retardants, chlorinated paraffins, PFAS; transformation products and unknowns.	Yes (discussed; not new measurements)	Space/time variability; sampling strategies; matrix effects; mixture models (concentration addition vs independent action).	Recovery standards (isotope-labelled) for chemical analysis; independent recovery experiments for bioassays; parallel cytotoxicity assays; emphasizes stringent QC for bioassays.	Yes—bioanalytical equivalent concentrations (BEQbio) relative to well-characterized reference chemicals for specific MOA.	Discusses mixture toxicity; notes synergy typically limited and less relevant at low, environmentally realistic doses; highlights co-stressors (temperature, oxygen, acidification).	Many features remain unidentified; incomplete mass-balance (BEQbio > BEQchem); matrix suppression; limited toxicity data for many chemicals.	No primary dataset; synthesis and conceptual frameworks.	No explicit MSI citation in the extracted text.	Yes—CompTox, NORMAN suspect list exchange, PubChem, ToxCast/Tox21, literature sources.	Strengths and weeknesses	Strengths and weeknesses
	Review	Circadian physiology of metabolism	Panda 2016	https://doi.org/10.1126/science.aah4967	Review of circadian regulation of metabolism, integrating molecular clock mechanisms with feeding-fasting and light cues; discusses -omics evidence including metabolomics and benefits of time-restricted feeding.	Primarily mammals (mouse and human) with references to insects; review	N/A	N/A	N/A	Discusses multiple tissues (SCN, liver, pancreas, gut, adipose, muscle) conceptually; no new sampling.	N/A (review)	Discusses multi-omics including metabolomics in liver and other tissues; no single platform used (review).	None	No	Highlights timing of feeding, light, sleep, and systemic factors (hormones, temperature) as drivers of diurnal rhythms; discusses DIO vs time-restricted feeding.	N/A	N/A	Discusses circadian disruption (shift work, diet) and metabolic disease risk; not field synergy testing.	Notes open questions on TRF mechanisms and translation to humans; emphasizes need for systematic analyses.	N/A	No	Yes—synthesis of published animal and epidemiological studies	Strengths and weeknesses	Strengths and weeknesses
	Primary research	Rhythmic Oxygen Levels Reset Circadian Clocks through HIF1α	Adamovich et al., 2017	https://doi.org/10.1016/j.cmet.2016.09.014	Experimental study showing daily rhythms in blood and tissue oxygenation in rodents; physiological O2 cycles synchronize cellular clocks in cultured cells via HIF1α and low-oxygen pulses accelerate jet lag adaptation in mice.	Mice and rats; cultured mouse cell lines (Hepa-1c1c7, NIH 3T3)	N/A	Examples: oxygen consumption mean of 8 mice; blood oxygen 4 animals per time point; kidney telemetry n=5 rats (as reported in figures).	Laboratory settings (N/A)	Blood oxygen; kidney tissue oxygen (rats); mouse kidney and brain nuclear extracts; cultured cells for gene/protein expression.	Not metabolomics; targeted physiological and molecular assays (oxygen, qPCR, immunoblot).	N/A	None	No	Controlled oxygen cycles (5%/8% O2) and ambient pulses (16%/14% O2); controlled CO2 and temperature; avoided luciferase reporters due to oxygen sensitivity.	Continuous monitoring of O2/temperature/CO2; use of housekeeping genes (Tbp, Hprt, Rplp0) for qPCR normalization; controls include constant O2 and dexamethasone synchronization; siRNA controls.	Statistical significance reported; gene expression by qPCR and protein by immunoblot; HIF1α dependence tested by siRNA and heterozygous mice.	Focus on oxygen as systemic cue; no field multi-stressor synergy/antagonism analysis.	Avoided luciferase reporters because luciferase activity is oxygen-sensitive; mechanism may involve multiple clock genes (Cry2/Rora not sufficient alone).	Supplemental information (figures/tables) referenced; no public dataset indicated in text.	No	N/A (primary experimental)	Strengths and weeknesses	Strengths and weeknesses
	Review	Metabolomics reveal circadian control of cellular metabolism	Ratnasekhar et al., 2020	https://doi.org/10.1016/j.trac.2020.115986	Review summarizing recent metabolomics advances characterizing baseline circadian metabolism across humans, mice, Drosophila and cyanobacteria; discusses experimental design and analytical challenges (sampling, normalization, rhythm detection).	Humans, mice, Drosophila melanogaster, cyanobacteria (review)	N/A	N/A (review; cites examples such as 4–10 mice per time point and pooling as approaches)	N/A	Discusses plasma/serum, urine, saliva, breath, muscle biopsies, liver, SCN, organelles, cyanobacteria cultures (from reviewed studies).	Discusses both targeted and untargeted approaches used in literature.	NMR and MS-based metabolomics (GC-MS, LC-MS, CE-MS) with discussion of rhythm detection algorithms (JTK_CYCLE, ARSER, RAIN, LS, eJTK, MetaCycle), sampling resolution, normalization strategies.	None (focus on circadian metabolism; mentions xenobiotic metabolism as pathway in reviewed mouse liver study).	No	Emphasizes controlling light-dark, feeding-fasting, temperature, sleep-wake; discusses sampling resolution (preferably 1h over 48h for discovery) and inter-individual variability.	Recommends circadian QC markers (cortisol, peroxiredoxins) and use of internal standards and pooled QC samples to manage batch/matrix effects.	Discusses statistical detection of rhythmicity and multiple testing control (FDR/q-values); identification challenges.	Not a field multi-stressor paper; discusses circadian disruption (shift work, sleep deprivation) and metabolic effects conceptually.	Highlights challenges: sampling logistics, low amplitude metabolite rhythms, batch effects, normalization pitfalls (e.g., creatinine rhythmicity), metabolite ID limitations.	N/A (review)	No explicit MSI mention in extracted text	Yes—compiles and discusses many published studies	Strengths and weeknesses	Strengths and weeknesses
	Primary research	Atlas of Circadian Metabolism Reveals System-wide Coordination and Communication between Clocks	Dyar KA et al. 2018	https://doi.org/10.1016/j.cell.2018.08.042	Primary multi-tissue circadian metabolomics study: 24-hr metabolomics profiling of eight mouse tissues under chow vs high-fat diet to map temporal coordination, tissue-specific oscillations, and rewiring of metabolite correlations by nutrient stress.	Male C57BL/6J mice	N/A	5 male mice per time point per diet (with a few losses at specific brain timepoints); timepoints every 4 hr; 6 timepoints for SCN/mPFC/muscle/sperm and 7 timepoints (incl. ZT24) for serum/liver/BAT/WAT.	Laboratory (N/A)	SCN, medial prefrontal cortex, gastrocnemius skeletal muscle, brown adipose tissue, white adipose tissue, liver, serum, cauda epididymal sperm.	Untargeted (non-targeted) metabolite profiling; additional targeted functional assay for UCP1 inhibition by purine nucleotides.	Mass spectrometry metabolomics using LC/MS and GC/MS. Samples run on Metabolon HD3 (LTQXL + UPLC + GC/MS) and HD4 (Q Exactive HRAM + UPLC) platforms; metabolites categorized by Metabolon superpathways; rhythmicity via JTK_CYCLE.	None (dietary manipulation: high-fat diet vs chow as exposure/perturbation).	No	Circadian time (ZT) sampling across 24 hr; diet (chow vs 60% kcal high-fat); 12h light/12h dark; statistical models include time, diet, and interaction terms.	Run-day median correction; removal of metabolites with >50% missing values; log10 transform; outlier removal (>4 SD); k-nearest-neighbor imputation for missing; permutation-based robust correlations.	Diet effects via linear regression/ANOVA; circadian oscillation via JTK_CYCLE (adjusted p<0.05); cross-tissue correlations Bonferroni corrected. Functional proton leak assays used defined nucleotide additions (GDP, GMP, IMP).	Assesses interaction of circadian timing with chronic nutrient stress (HFD) across tissues; not a field synergy/antagonism study.	Notes some biological replicates lost during processing for select brain timepoints; multi-platform differences (HD3 vs HD4) and missingness handled by imputation.	Yes—interactive CircadiOmics portal; raw 24-hr metabolomics intensity data deposited (10.17632/zndtmk8xc6.1) and Table S4.	No explicit MSI citation in paper.	Yes—CircadiOmics database/portal; Metabolon curated libraries and pathway annotations.	Strengths and weeknesses	Strengths and weeknesses
	Primary research	Effect of Rainfall on Water Parameters in Recreational Lakes in Heidelberg, Germany	Abhishek et al. 2024	https://doi.org/10.61927/igmin153	Assesses the impact of sporadic rainfall events (Aug–Sep 2023) on physicochemical parameters, nutrients and trace metals in five recreational lakes near Heidelberg, Germany, comparing conditions before and after rainfall.	Not applicable (surface water quality study)	Waidsee (49.53, 8.63); Waldsee (49.55, 8.58); Vogelstangsee (49.50, 8.54); Oberer Vogelstangsee (49.50, 8.54); SRH Lake (49.41, 8.65)	Five stations sampled before and after rainfall with three timing replications per station	5 recreational lakes	Not applicable	Targeted	Not applicable	Nitrates, phosphates, sulphates, zinc, copper; physicochemical parameters (pH, DO, conductivity, redox, turbidity)	Surface water (lake water)	Rainfall occurrence, before vs after precipitation, spatial differences among lakes	In situ calibrated probes; laboratory spectrophotometric analysis; standardized sampling depth; statistical analysis (ANOVA, Duncan test)	Yes; statistical significance assessed using ANOVA and Duncan MRT (P < 0.05)	Rainfall-driven dilution effects examined; no explicit synergistic/antagonistic stressor experiments	Short-term study period; limited to five lakes; no long-term or seasonal assessment	Yes – data included within the article	No	Weather forecasts from Deutscher Wetterdienst (Germany)	Strengths and weeknesses	Strengths and weeknesses
	Primary research	Rainfall Runoff and Dissolved Pollutant Transport Processes Over Idealized Urban Catchments	Zhang et al. 2020	https://doi.org/10.3389/feart.2020.00305	Develops and validates a two-dimensional physically based model for rainfall–runoff and dissolved pollutant transport over urban catchments, explicitly accounting for building layout and spatially variable pollutant distributions.	Not applicable (physical hydrology and water quality study).	China (Hohai University laboratory); idealized urban catchments.	Multiple rainfall events across three catchment layouts and four rainfall intensities.	Laboratory-scale experimental catchments.	Not applicable.	Targeted (dissolved pollutant tracer).	Not metabolomics-based; hydraulic–solute transport modeling with NaCl tracer.	Dissolved pollutant (sodium chloride as tracer).	Surface runoff water.	Rainfall intensity, building layout, pollutant spatial distribution.	Model validation against laboratory experiments; Nash–Sutcliffe efficiency.	Statistical goodness-of-fit (NSE); calibrated transport parameters.	Indirectly examined via combined effects of rainfall, buildings and pollutant distribution.	Idealized laboratory setups; constant rainfall; simplified pollutant chemistry.	Yes – all data included in article and supplementary materials.	Not applicable.	No.	Strengths and weeknesses	Strengths and weeknesses
	Review	Links between thermoregulation and aging in endotherms and ectotherms	Flouris et al. 2015	https://doi.org/10.4161/23328940.2014.989793	Review comparing thermoregulatory mechanisms implicated in aging across endotherms and ectotherms; argues low body temperature benefits lifespan and discusses candidate mechanisms (e.g., brown adipose tissue/uncoupling proteins, immune modulation, behavioral thermoregulation).	Multiple (endotherms and ectotherms; examples include humans, mice, fish, Drosophila, C. elegans)	N/A	N/A (review)	N/A	N/A (review; discusses body temperature regulation, brown adipose tissue, etc.)	N/A	N/A (not a metabolomics study)	None	No	Body temperature, ambient temperature, cold exposure/acclimation, metabolic rate, thermosensory neurons, endothermic vs ectothermic thermoregulation.	N/A	N/A	Discusses interactions among temperature, metabolism, immune function, and ecological costs of thermoregulation; not an empirical field mixture analysis.	States that mechanistic pathways are not fully elucidated, particularly in ectotherms; calls for further mechanistic work.	N/A	No	Yes—synthesizes published literature	Strengths and weeknesses	Strengths and weeknesses
Data analysis and reporting	Discussion / policy / guidance	Open Science in regulatory environmental risk assessment	Brock et al. 2021	https://doi.org/10.1002/ieam.4433	Discussion paper arguing that Open Science (transparency, data accessibility, FAIR principles) can increase trust, reproducibility, and inclusivity in regulatory environmental risk assessment (ERA). Reviews opportunities, barriers, stakeholder roles, and implications for problem formulation and weight-of-evidence.	Not species-specific; discusses protection goals for wildlife, populations, communities, and ecosystem services in ERA.	N/A	N/A (discussion/guidance paper).	N/A	N/A	N/A	Not a metabolomics study; discusses ERA data broadly (toxicity, exposure, modelling, omics as supporting evidence).	General (regulated chemicals such as pesticides, industrial chemicals, pharmaceuticals; conceptual discussion).	Discussed conceptually across environmental compartments.	Transparency, data reliability and relevance, problem formulation, protection goals, stakeholder involvement, regulatory frameworks.	Emphasizes reporting standards, reliability/relevance evaluation tools (e.g., Klimisch, CRED), and transparent documentation.	N/A (no experimental hypothesis testing).	Addresses multiple stressors conceptually via weight-of-evidence and ERA frameworks.	Notes challenges around confidentiality, misuse of data, preprints, data overload, and uneven stakeholder capacity.	Data available on request (no primary dataset).	No	Yes—draws extensively on regulatory guidance, literature, and stakeholder initiatives.	Data analysis and reporting	Data analysis and reporting
	Book chapter / guidance (ERA theory & practice)	Fundamentals of Ecological Risk Assessment	Wenning et al. 2024 (Chapter 22)	https://doi.org/10.1002/9781119742975.ch22	Book chapter describing ecological risk assessment (ERA) theory and practice: planning, screening-level ERA, detailed ERA steps, exposure/effects characterization, risk characterization, and emerging methods (Bayesian models, multi-stressor approaches, omics & AOP integration).	General wildlife taxa (fish, amphibians, birds, mammals, reptiles; focus on populations/ecosystem integrity rather than individuals).	N/A	N/A (guidance chapter; notes using maxima/95th percentile concentrations in SLERA; robust sampling needed to meet DQOs).	N/A	Not primary omics study; discusses measuring contaminants in water, sediment, soil, vegetation, prey tissues; mentions omics integration conceptually.	N/A	Not a metabolomics study; discusses integrating environmental omics (genomics/transcriptomics/proteomics/metabolomics) and AOPs as emerging ERA tools.	Discusses chemicals and mixtures, metals, organochlorine and perfluorinated chemicals; uses COPEC concept; provides soil screening values for metals and exposure equations.	Discussed extensively (surface water, sediment, soil; plus air, prey, vegetation).	Problem formulation (CSM), exposure pathways, receptor selection, fate/transport, degradation/biotransformation, effects thresholds, safety factors, uncertainty and weight-of-evidence.	Emphasizes data quality objectives (DQOs), acceptable laboratory practices for ecotoxicity studies, and data quality limitations in SSDs and ERA.	Risk metrics include hazard quotients, toxicity reference values, SSDs, WOE; not metabolomics significance testing.	Addresses chemical mixtures and notes additive/synergistic/antagonistic possibilities; also multi-stressor and climate change interactions; acknowledges additivity/synergy often uncommon at low concentrations.	Highlights uncertainty as major limitation; mixtures increase uncertainty; limited data for many species/chemicals; climate change incorporation still limited; SSD data quality challenges.	No primary dataset (book chapter).	No	Yes—draws heavily on regulatory guidance and published literature; includes tables of screening values and guidance resources.	Data analysis and reporting	Data analysis and reporting
	Primary research	Proposed minimum reporting standards for chemical analysis (CAWG) Metabolomics Standards Initiative (MSI)	Sumner et al. 2007	https://doi.org/10.1007/s11306-007-0082-2	Metabolomics Standards Initiative Chemical Analysis Working Group (CAWG) proposes minimum reporting standards for the chemical analysis portion of metabolomics: sample preparation, chromatographic and MS/NMR parameters, QC/method validation, data preprocessing, and metabolite identification levels.	N/A (standards/guideline)	N/A	Recommends minimum biological replicates n=3 (n=5 preferred) for sampling/analysis.	N/A	N/A (guideline; discusses tissues and biofluids generally).	Applies to both; addresses relative vs absolute quantification, targeted and discovery studies.	Covers MS (GC-MS, LC-MS, CE-MS), NMR, FT-IR, stable isotope/flux analysis, and data preprocessing workflows.	Not a study; mentions xenobiotics should be distinguished from endogenous metabolites when reporting unknowns.	N/A	Reporting requirements for sample prep, chromatography, instrument configuration, acquisition parameters, and processing steps to enable reproducibility and reuse.	Encourages instrumental performance validation and method validation; outlines LLOQ/LOD, accuracy/precision, calibration, internal standards, replicate analyses, and QC reporting.	Defines identification confidence levels (1 identified; 2 putatively annotated; 3 putatively characterized class; 4 unknown) and recommends orthogonal evidence with authentic standards for level 1.	N/A (reporting standard; not field).	Acknowledges standards focus mainly on MS and NMR due to popularity; needs more input for CE, electrochemical detection and other techniques; identification criteria still evolving.	No primary dataset; provides links to MSI workgroup resources and forums.	Yes (this paper is an MSI CAWG minimum reporting standard).	Builds on prior literature and aligned standards efforts (e.g., MIAME/other MSI groups); no third-party experimental data.	Data analysis and reporting	Data analysis and reporting
	Methods	Mind your Ps and Qs – Caveats in metabolomics data analysis	Xu and Goodacre 2025	https://doi.org/10.1016/j.trac.2024.118064	Comprehensive review of common statistical and chemometric pitfalls in metabolomics data analysis, including misuse of p-values, multiple testing, PLS-DA/OPLS-DA validation, Q2 interpretation, and feature selection.	General (examples across biological systems).	N/A	Discusses implications of small sample sizes and non-independent replicates; no primary sampling.	N/A	Discusses biofluids, cells, tissues conceptually; no primary data.	Primarily untargeted metabolomics.	UPLC-MS, GC-MS, NMR with univariate and multivariate statistical modelling.	None (methodological/statistical focus).	No	Statistical assumptions, multiple testing, model validation, overfitting, permutation testing.	Advocates rigorous validation, permutation testing, proper training/test splits, and transparent reporting.	Critiques misuse of p-values, Q2, and inappropriate significance claims.	Not addressed.	Highlights reproducibility crisis, software misuse, and limited statistical literacy.	Data available on request.	No	Yes—review of published studies and methods.	Data analysis and reporting	Data analysis and reporting
	Methods	Metabolites are not genes — avoiding the misuse of pathway analysis in metabolomics	Lee et al. 2025	https://doi.org/10.1038/s42255-025-01283-0	Commentary highlighting conceptual, biological, and analytical pitfalls of applying gene-centric pathway analysis methods to metabolomics data, and proposing best-practice considerations to avoid misleading interpretations.	General (conceptual; examples across mammals and biofluids).	N/A	N/A (commentary).	N/A	Examples discussed include urine, serum, and tissue metabolites; no primary data.	Primarily discusses untargeted MS-based metabolomics.	Conceptual discussion of MS-based metabolomics, pathway analysis, annotation challenges, flux analysis.	None (endogenous metabolites).	No	Pathway coherence, metabolite transport, compartmentalization, annotation confidence, database limitations.	Emphasizes rigorous metabolite annotation, manual validation, and biological context.	Not applicable; critiques statistical/pathway significance inference.	Not addressed.	Notes incomplete metabolome coverage, database gaps, isomer ambiguity, and misuse of automated tools.	N/A (commentary).	No	Yes—draws on published literature and pathway resources.	Data analysis and reporting	Data analysis and reporting
	Methods	DRomics, a workflow to exploit dose-response omics data in ecotoxicology	Delignette-Muller et al. 2023	https://doi.org/10.24072/pcjournal.325	Presents DRomics (R package + Shiny apps) for analysing dose-response omics data in ecotoxicology, including selection of responsive features, dose-response modeling, benchmark dose (BMD) estimation and tools for biological interpretation across omics levels.	General ecotoxicology organisms; tool supports varied omics including non-model species and communities (meta-omics).	N/A	Supports designs with many doses (>6 preferred) and can handle situations with low or even no experimental replicates; recommends ≥6–7 doses (never <4).	N/A	N/A (method paper; applicable to transcriptomics, proteomics, metabolomics and anchoring endpoints).	Untargeted omics (transcriptomic/proteomic/metabolomic) in dose-response designs.	Dose-response modelling workflow (trend tests, model family incl. biphasic models), BMD estimation with bootstrap CI; integrates with limma/DESeq2; Shiny apps for interpretation.	Not a measurement study; focuses on analyzing pollutant dose-response omics data (general pollutants).	Not directly; applicable to lab/field ecotoxicology datasets.	Dose gradient, FDR control (Benjamini-Hochberg mandatory), batch effects (can be corrected), response trends (up/down/U/bell), multi-omics comparisons.	Statistical controls include FDR correction; tools for PCA/outlier detection; bootstrap CIs for BMD; encourages robust dose-response design.	Significant responsive items via ANOVA or linear/quadratic trend tests; BMD-zSD described; supports pathway-level summaries via quantiles of BMDs.	Can be applied to different conditions/timepoints and community exposure histories; not explicitly synergy/antagonism.	Highlights dependence on good design; limited model averaging planned due to trend characterization; acknowledges challenges for annotation in non-model organisms.	Code and scripts available (CRAN/GitHub); example data embedded in DRomics package; Shiny apps available online.	No explicit MSI reference in excerpt.	Yes—builds on other DR tools and published datasets; uses Bioconductor packages.	Data analysis and reporting	Data analysis and reporting
	Methods	DRomics: A turnkey tool to support the use of the dose–response framework for omics data in ecological risk assessment	Larras et al. 2018	https://doi.org/10.1021/acs.est.8b04752	Introduces DRomics, an R package and web tool for analysing dose–response omics data, enabling modelling of monotonic and biphasic responses and derivation of benchmark doses for ERA.	Demonstrated on green algae Scenedesmus vacuolatus; applicable to diverse organisms.	N/A	Designed for many doses with few replicates; example uses 5 replicates across concentrations.	Laboratory study.	Transcriptomics (microarray); applicable to metabolomics and other omics.	Untargeted omics data.	Dose–response modelling using linear, exponential, Hill and Gaussian–probit models; BMD-zSD estimation.	Example chemical: triclosan exposure.	Waterborne exposure in algal cultures.	Concentration gradients, trend type, model selection, false discovery rate control.	Statistical QC via FDR correction, model-fit diagnostics, repeatability analysis.	Significant responses via trend tests; ECs/BMDs derived statistically.	Tool applicable but not explicitly tested here.	Performance depends on experimental design; fewer concentrations reduce robustness.	Yes—R package, web application, and example datasets available.	Not explicitly cited.	Yes—compares with BMDExpress and other ERA tools.	Data analysis and reporting	Data analysis and reporting
	Methods	Sharing and community curation of mass spectrometry data with Global Natural Products Social Molecular Networking	Wang et al. 2016	https://doi.org/10.1038/nbt.3597	Introduces GNPS, a community-driven platform enabling sharing, analysis, molecular networking and continuous reanalysis of MS/MS data for natural products and metabolomics.	Multi-species (microorganisms, plants, animals, humans; environmental and biological samples).	Global (multi-country data contributors).	Study-dependent; millions of community-submitted spectra.	Global community data repository.	Multiple matrices (environmental, microbial, plant and animal tissues; biofluids).	Primarily untargeted MS/MS.	LC–MS/MS with molecular networking, dereplication and spectral library matching.	Not contaminant-focused; chemical diversity discovery.	Supported when MS/MS data are deposited.	Spectral similarity, annotation confidence, continuous reanalysis.	Community curation, gold/silver/bronze spectral tiers, match ratings.	Reference spectral libraries and cosine similarity thresholds.	Indirectly supported via comparative networking.	Low overall identification rate; reliance on community contributions.	Yes – GNPS/MassIVE repositories.	Aligned with MSI principles but not explicitly framed as MSI.	Yes – MassBank, NIST, ReSpect, HMDB, MetaboLights.	Data analysis and reporting	Data analysis and reporting
	Commentary	The hidden impact of in-source fragmentation in metabolic and chemical mass spectrometry data interpretation	Giera et al. 2024	https://doi.org/10.1038/s42255-024-01076-x	Shows that in-source fragmentation (ISF) during ESI-LC–MS/MS can account for >70% of detected features, explaining much of the so-called dark metabolome as analytical artefacts rather than true metabolites.	Not species-specific; analysis based on chemical standards (METLIN database).	N/A	Database mining study; no biological replicates.	N/A	Not applicable (chemical standards and database analysis).	Untargeted MS feature interpretation.	LC–MS/MS with ESI; mining METLIN MS/MS spectra at 0 eV to assess in-source fragmentation prevalence.	N/A	N/A	Ionisation conditions, collision energy (0 eV), instrument platform comparisons.	Use of curated METLIN database with defined intensity thresholds; cross-instrument comparison.	Yes—931,000 molecular standards from METLIN used to quantify ISF contribution.	N/A	Focuses on analytical artefacts; does not negate existence of unknown metabolites but urges reinterpretation of LC–MS features.	Yes—analysis code and METLIN data accessible.	Not explicitly cited.	Yes—METLIN MS/MS database.	Data analysis and reporting	Data analysis and reporting
	Guidelines	Mass spectrometry–based metabolomics: a guide for annotation, quantification and best reporting practices	Alseekh et al. 2021	https://doi.org/10.1038/s41592-021-01197-1	Provides comprehensive best-practice guidelines for MS-based metabolomics, covering sampling, replication, quantification, ion suppression, annotation, reporting standards and data sharing.	Broadly applicable across plants, microbes and animals.	N/A	Recommends ≥4 biological replicates; discusses technical and analytical replication.	N/A	Guidelines cover tissues, cells, biofluids (serum, plasma, urine).	Primarily untargeted MS-based metabolomics, with relevance to targeted approaches.	GC–MS and LC–MS workflows; annotation via MS/MS, standards, databases; reporting via mzTab and repositories.	Not contaminant-focused; methodological guidance.	Applicable but not specifically addressed.	Sampling, quenching, extraction, ion suppression, batch effects, normalization, reporting transparency.	Strong emphasis on QC: pooled QC samples, reference materials, recovery and recombination experiments.	Emphasizes authenticated standards and annotation confidence levels (A–D).	Not directly addressed.	Acknowledges incomplete metabolome coverage and challenges in standard adoption.	Guidelines; supplementary Excel templates provided.	Yes—explicitly discusses and builds on Metabolomics Standards Initiative (MSI).	Yes—references major metabolomics databases and community tools.	Data analysis and reporting	Data analysis and reporting
	Database / resource article	Metabolomics Workbench: An international repository for metabolomics data and metadata, metabolite standards, protocols, tutorials and training, and analysis tools	Sud et al. 2015/2016	https://doi.org/10.1093/nar/gkv1042	Describes Metabolomics Workbench, an NIH Common Fund metabolomics data repository and analysis platform providing study metadata and raw/processed MS and NMR data across >20 species, plus metabolite structures, protocols, standards, and integrated exploratory analysis tools.	Cross-species (humans, other mammals, plants, insects, invertebrates, microorganisms; repository spans >20 species).	N/A	N/A (repository paper; emphasizes metadata requirements for reproducibility and MSI-based templates).	N/A	Repository covers diverse sample types (tissues, biofluids including serum; study-dependent).	Both (repository includes targeted and untargeted MS/NMR studies).	MS and NMR data including LC-MS and GC-MS; provides analysis tools (PCA, PLS-DA, volcano, clustering, network correlation etc.) and metadata templates (mwTab, Excel).	N/A (repository includes many study types; not focused on contaminants per se).	May be included depending on deposited studies; not specific in this article.	Standardized metadata capture: project, study design, treatment, collection, sample prep, chromatography, analysis, MS/NMR; supports data deposition, curation, and reuse.	Metadata templates include QC-relevant fields (sample storage, prep, extraction, instrument parameters); repository provides protocols and standards resources.	N/A (describes tools; not a single study).	N/A	Notes heterogeneity of data and need for metadata standards; aims to integrate and exchange with other repositories (e.g., MetaboLights) via metabolomeXchange.	Yes—public repository; data downloadable via FTP and REST; templates and mwTab format supported.	Yes—adopts MSI minimum reporting recommendations and provides MSI-aligned metadata templates.	Yes—curates metabolite structures from public databases (HMDB, ChEBI, PubChem, KEGG, LIPID MAPS, etc.).	Data analysis and reporting	Data analysis and reporting
	Database / resource article	MetaboLights: open data repository for metabolomics	Yurekten et al, 2024	https://doi.org/10.1093/nar/gkad1045	Describes MetaboLights, a global open repository for metabolomics studies with raw data and metadata across organisms and techniques; highlights growth, curation, data reuse and new MetaboLights Labs (Galaxy workflows) for standardized processing and annotation.	Cross-species and cross-technique repository (majority human studies; also model organisms and plants).	N/A	N/A (repository paper; includes QC sample concepts like pooled QC and long-term reference in metadata).	N/A	Repository includes many sample types; common include human blood plasma/serum/urine and mouse liver/blood; study-dependent.	Both, with untargeted MS more prevalent than targeted; MS more prevalent than NMR.	Supports LC-MS, GC-MS, DI-MS and NMR; ISA model/metadata; curation links metabolites to ChEBI; MetaboLights Labs provides Galaxy workflows (msConvert, XCMS, BEAMSpy; NMR tooling).	Not a study; repository includes toxicology studies among others; not specific here.	Possible within repository depending on submissions; not specified as focus.	Metadata standardization (ISA, FAIR); QA/QC adoption; improved upload and architecture; limits on submitted studies; community outreach and standards.	Curation assigns ChEBI IDs; supports QA/QC metadata (pooled QC, long-term reference); encourages QA/QC reporting and standardized workflows.	N/A (resource paper).	N/A	Notes technological challenges due to growth; NMR raw data often compressed complicating reuse; ongoing development to improve queryability and workflows.	Yes—public repository; data available under EMBL-EBI terms and code under Apache 2.0 (GitHub); MetaboLights Labs open Galaxy instance.	Mentions alignment to ISA and FAIR; MSI not explicitly cited in excerpt.	Yes—ChEBI integration; submissions from community; GNPS reuse and other repositories interoperability.	Data analysis and reporting	Data analysis and reporting
	Standards review	A decade after the metabolomics standards initiative it’s time for a revision	Spicer et al. 2017	https://doi.org/10.1038/sdata.2017.138	Evaluates compliance of public metabolomics datasets with MSI reporting standards and argues that MSI guidelines require revision to improve metadata quality and reuse.	Multi-species (human, plant, microbial, animal studies assessed via repositories).	N/A	Repository compliance study; no experimental replicates.	Multiple repositories (MetaboLights, Metabolomics Workbench, MetaPhen, MeRy-B).	Not applicable (metadata analysis).	Both, as reported across deposited studies.	Meta-analysis of reporting standards compliance across public metabolomics repositories.	N/A	Not applicable.	Metadata completeness, biological context reporting, MSI guideline structure.	Assessment of compliance against defined MSI minimum reporting standards.	Not applicable; focus on reporting standards rather than biological effects.	Not addressed.	MSI guidelines difficult to interpret; low compliance partly due to complexity and burden of metadata submission.	Yes—analysis based on public repository records.	Yes—critical evaluation of MSI.	Yes—public metabolomics repositories.	Data analysis and reporting	Data analysis and reporting
	Primary research	MetaboLights—an open-access general-purpose repository for metabolomics studies and associated metadata	Haug et al. 2012	https://doi.org/10.1093/nar/gks1004	Describes MetaboLights, the first general-purpose open-access repository for metabolomics data, enabling standardized data sharing and reuse across species and platforms.	Cross-species (human, mouse, C. elegans, Arabidopsis, others).	N/A	Not applicable (database description).	Global repository.	Various tissues, biofluids and organisms as deposited by users.	Both targeted and untargeted metabolomics supported.	Repository supporting NMR and MS metabolomics; ISA-Tab metadata framework.	Study-dependent.	Supported depending on study.	Metadata standardization, data traceability, interoperability.	Guided submission enforcing MSI-compliant metadata; curated metabolite identifiers.	Study-dependent; repository supports annotation confidence.	Supported if deposited; not directly analysed.	Early-stage repository at publication; reliance on community compliance.	Yes—open-access metabolomics datasets.	Yes—explicitly aligned with MSI.	Yes—links to ChEBI, HMDB, METLIN and others.	Data analysis and reporting	Data analysis and reporting
	Primary research	Effects of Preanalytical Sample Collection and Handling on Comprehensive Metabolite Measurements in Human Urine Biospecimens	Braisted et al. 2024	https://doi.org/10.1093/aje/kwae347	Systematic evaluation of how urine sample handling (preservatives, refrigeration, freeze–thaw cycles) affects untargeted metabolomics and false-positive discovery in epidemiological studies.	Human (13 adult volunteers).	USA (Beltsville, Maryland).	13 participants; 30 samples per participant across handling conditions.	Single collection site; laboratory-controlled study.	Urine.	Untargeted metabolomics.	UHPLC–MS/MS (Metabolon platform) with internal standards and pooled QC samples.	Not contaminant-focused; evaluates preanalytical artefacts.	Not applicable.	Preservatives, refrigeration, freeze–thaw cycles, thaw temperature.	Pooled QC samples, internal standards, batch control, replicate correlations.	Yes—statistical testing with BH correction; most metabolites Tier 1 MSI identification.	Simulated case–control scenarios with inconsistent handling.	Small cohort; healthy volunteers only; urine-specific findings.	Yes—Metabolomics Workbench (PR001885).	Yes—MSI tiered identification referenced.	Yes—Metabolon platform and Metabolomics Workbench.	Data analysis and reporting	Data analysis and reporting
	Primary research	How storage post sampling influences the stability of sebum when used for mass spectrometry metabolomics analysis	Walton-Doyle et al. 2024	https://doi.org/10.1038/s41598-024-71598-7	Evaluates stability of sebum metabolomic profiles under different storage temperatures and durations, supporting remote and low-burden sampling.	Human volunteers (n=8).	UK (Manchester).	8 participants; repeated measures across storage times and temperatures.	Single study population; laboratory analysis.	Sebum.	Untargeted metabolomics.	hD–GC–MS and LC–IM–MS.	Not contaminant-focused.	Not applicable.	Storage temperature, storage duration, batch effects.	Batch controls, PCA/PLS-DA validation, ANOVA with FDR.	Statistical significance via ANOVA; library-based feature identification.	Not addressed.	Small cohort; sebum-specific matrix effects.	Yes – MetaboLights (MTBLS7946).	Implicitly aligned; not explicitly.	Yes – MetaboLights repository.	Data analysis and reporting	Data analysis and reporting
	Primary research	Making It Last: Storage Time and Temperature Have Differential Impacts on Metabolite Profiles of Airway Samples from Cystic Fibrosis Patients	Wandro et al. 2017	https://doi.org/10.1128/mSystems.00100-17	Assesses the effect of storage temperature, duration and freeze–thaw cycles on untargeted GC–MS metabolomics of cystic fibrosis sputum.	Human (cystic fibrosis patients).	USA (Michigan, California).	2 patient samples split into 76 aliquots.	Clinical sampling; laboratory analysis.	Sputum.	Untargeted metabolomics.	GC–MS untargeted profiling with BinBase identification.	Not contaminant-focused.	Not applicable.	Storage temperature (4°C vs 20°C), time, freeze–thaw cycles.	Replicate analysis, PERMANOVA, CV assessment.	GC-MS library matching; relative abundances.	Not addressed.	Small number of patients; sputum-specific findings.	Yes – Dryad repository.	Not explicitly.	Yes – metabolomics databases.	Data analysis and reporting	Data analysis and reporting
	Standards / Reporting guideline	Introducing the Lipidomics Minimal Reporting Checklist	McDonald et al. 2022	https://doi.org/10.1038/s42255-022-00628-3	Introduces a consensus-driven, community-developed checklist defining minimum reporting requirements for lipidomics to improve transparency, reproducibility, and peer review.	Not species-specific (methodological standard).	N/A	Not applicable – reporting guideline.	N/A	Applicable to all lipidomic sample types.	Both targeted and untargeted lipidomics.	Guidelines spanning preanalytics, lipid extraction, MS platforms, identification, quantification, QC, validation and reporting.	Not applicable.	Applicable if lipids analysed from environmental matrices.	Sample handling, extraction, instrumentation, identification confidence, quantitation strategy.	Explicit QC and validation requirements included in checklist.	Guideline addresses use of standards and confidence levels.	Not addressed.	Checklist complements, rather than replaces, full methods descriptions.	Yes – checklist hosted by Lipidomics Standards Initiative.	Related but distinct; developed via Lipidomics Standards Initiative (LSI).	No.	Data analysis and reporting	Data analysis and reporting
